# Supplementary material for: The first horse herders and the impact of early Bronze Age steppe expansions into Asia
Source: HighWire-hosted journal article supplement (doi:10.1126/science.aar7711), 2018-05-09
Supplement: aar7711_de_Barros_Damgaard_SM.pdf [file aar7711_de_Barros_Damgaard_SM.pdf]

## Supplementary Materials for

### **The first horse herders and the impact of early Bronze Age steppe expansions into Asia**

Peter de Barros Damgaard\*, Rui Martiniano\*, Jack Kamm\*, J. Víctor Moreno-Mayar\*,  
Guus Kroonen, Michaël Peyrot, Gojko Barjamovic, Simon Rasmussen, Claus Zacho,  
Nurbol Baimukhanov, Victor Zaibert, Victor Merz, Arjun Biddanda, Ilja Merz,  
Valeriy Loman, Valeriy Evdokimov, Emma Usmanova, Brian Hemphill,  
Andaine Seguin-Orlando, Fulya Eylem Yediay, Inam Ullah, Karl-Göran Sjögren,  
Katrine Højholt Iversen, Jeremy Choin, Constanza de la Fuente, Melissa Ilardo,  
Hannes Schroeder, Vyacheslav Moiseyev, Andrey Gromov, Andrei Polyakov,  
Sachihiro Omura, Süleyman Yücel Senyurt, Habib Ahmad, Catriona McKenzie,  
Ashot Margaryan, Abdul Hameed, Abdul Samad, Nazish Gul,  
Muhammad Hassan Khokhar, O. I. Goriunova, Vladimir I. Bazaliiskii, John Novembre,  
Andrzej W. Weber, Ludovic Orlando, Morten E. Allentoft, Rasmus Nielsen,  
Kristian Kristiansen, Martin Sikora, Alan K. Outram, Richard Durbin<sup>†</sup>, Eske Willerslev<sup>†</sup>

\*These authors contributed equally to this work.

<sup>†</sup>Corresponding author. Email: rd109@cam.ac.uk (R.D.); ewillerslev@snm.ku.dk (E.W.)

Published 9 May 2018 on *Science* First Release  
DOI: 10.1126/science.aar7711

#### **This PDF file includes:**

Supplementary Text  
Figs. S1 to S37  
Tables S1, S2, S4 to S13, and S15 to S17  
References

#### **Other Supplementary Material for this manuscript includes the following:**

(available at [www.sciencemag.org/cgi/content/full/science.aar7711/DC1](http://www.sciencemag.org/cgi/content/full/science.aar7711/DC1))

Tables S3 and S14 as Excel files

## Table of Contents

|                                                                                 |    |
|---------------------------------------------------------------------------------|----|
| Table of Contents.....                                                          | 2  |
| S1: Sample description.....                                                     | 3  |
| S1.1 Skeletal materials from Botai.....                                         | 3  |
| S1.1.1 Osteological analysis.....                                               | 4  |
| S1.1.2 Archaeological context.....                                              | 4  |
| S1.2 Skeletal materials from Sholpan and Gregorievka.....                       | 5  |
| S1.3 Okunevo.....                                                               | 5  |
| S1.4 Baikal Hunter-Gatherers.....                                               | 5  |
| S1.4.1 Lokomotiv.....                                                           | 6  |
| S1.4.2 Shamanka II.....                                                         | 6  |
| S1.4.3 Ust'-Ida I.....                                                          | 6  |
| S1.4.4 Kurma XI.....                                                            | 6  |
| S1.4.5 Chronology.....                                                          | 6  |
| S1.5 Anatolian materials.....                                                   | 7  |
| S1.5.1 Kaman-Kalehöyük excavations (Kaman, Kırşehir, Turkey).....               | 7  |
| S1.5.2 Ovaören excavations (Nevşehir, Turkey).....                              | 9  |
| S1.6 Turkmenistan samples.....                                                  | 9  |
| S1.6.1 Namazga samples.....                                                     | 9  |
| S1.6.2 Kara-Depe.....                                                           | 10 |
| S2: Ancient data analyses.....                                                  | 11 |
| S2.1 Data generation.....                                                       | 11 |
| S2.2 Raw read processing and mapping.....                                       | 12 |
| S2.3 Contamination estimates.....                                               | 12 |
| S2.4 Sex determination.....                                                     | 13 |
| S2.5 Relatedness.....                                                           | 13 |
| S2.6 Genotyping.....                                                            | 14 |
| S2.7 Principal Component Analysis.....                                          | 14 |
| S2.8 Model-based clustering.....                                                | 14 |
| S2.9 D-statistics.....                                                          | 14 |
| S2.10 qpAdm modeling.....                                                       | 15 |
| S2.10.1 Methods.....                                                            | 15 |
| S2.10.2 Assessing outgroup informativeness.....                                 | 15 |
| S2.11 qpGraph shows no evidence of Botai-Yamnaya gene flow.....                 | 16 |
| S2.12 Chromopainter.....                                                        | 16 |
| S2.13 SFS-based modeling.....                                                   | 17 |
| S2.13.1 A simple model for Yamnaya ancestry.....                                | 18 |
| S2.13.2 No significant Botai-Yamnaya gene flow detected.....                    | 19 |
| S2.13.3 Modeling the central Eurasian steppe 5,000 years ago.....               | 20 |
| S2.13.4 Combining the Yamnaya and central steppe models.....                    | 21 |
| S2.13.5 Adding a Yamnaya->Okunevo pulse.....                                    | 21 |
| S2.13.6 Robustness of results to errors in medium-coverage ancient samples..... | 21 |
| S2.14 Uniparental marker analysis.....                                          | 22 |
| S2.14.1 Y-chromosome analysis.....                                              | 22 |

|                                                                                                                      |    |
|----------------------------------------------------------------------------------------------------------------------|----|
| S2.14.1.1 Variant calling and haplogroup determination.....                                                          | 22 |
| S2.14.1.2 Y-chromosome phylogeny.....                                                                                | 22 |
| S2.14.1.3 Adding low-coverage ancient branches to a tree estimated with high-coverage Y-chromosomal data.....        | 22 |
| S2.14.1.4 Visualizing ancestral and derived SNPs.....                                                                | 23 |
| S2.14.1.5 Limitations.....                                                                                           | 24 |
| S2.14.1.6 Results.....                                                                                               | 24 |
| S2.14.1.6.1 Steppe – Botai and Yamnaya.....                                                                          | 24 |
| S2.14.1.6.2 Baikal Early Neolithic.....                                                                              | 24 |
| S2.14.1.6.3 Late Neolithic/Bronze Age Baikal and Okunevo.....                                                        | 25 |
| S2.14.1.6.4 Turkmenistan and Anatolia.....                                                                           | 26 |
| S2.14.2 Mitochondrial DNA analysis.....                                                                              | 27 |
| S2.14.2.1 Ancient sample mtDNA lineage determination.....                                                            | 27 |
| S2.14.2.2 Results.....                                                                                               | 27 |
| S2.15 Rare variant sharing between modern populations and the Botai and Yamnaya samples.....                         | 28 |
| S2.15.1 Relative abundance of rare variant sharing with European and East Asian populations at a regional scale..... | 29 |
| S2.15.2 Contemporary geographical distribution of rare variants that are shared with Yamnaya and with Botai.....     | 29 |
| S2.15.3 Geographic maps of rare variant sharing abundance.....                                                       | 29 |
| S3: Radiocarbon dating.....                                                                                          | 30 |

## Supplementary Text

### S1: Sample description

#### S1.1 Skeletal materials from Botai

Recent studies focusing on the archaeology of Copper Age Botai culture (~3500–3000 BCE) provide strong evidence for the practice of horse domestication. First, examination of dental pathologies in Botai horses revealed different types of bit wear in their premolars that are consistent with horse riding (10, 17). Second, equine lipid residue was identified in pottery at the Botai site, indicating animal husbandry and use of secondary products (10). Botai represents the earliest unambiguous evidence for domestic horse herding and riding (17), and, therefore, studying this population is essential for understanding the population dynamics surrounding horse domestication and determining the demographic impact of Botai in other prehistoric groups in which the horse was also a central cultural element. A more detailed description of the Botai site and discussion of the origins of the Botai culture can be found in reference (15).

Samples were taken from 3 different individuals for DNA extraction and analysis. 2 are genetically male, and 1 is a genetically female individual. The fact that all 3 individuals are genetically very similar increases the probability that these individuals accurately reflect Botai population rather than exogenous individuals present at the site through mechanisms like marriage. 2 of the samples were taken from crania curated in Petropavlovsk Museum, denoted as “Botai Excavation 14, 1983” and “Botai excavation 15.” Botai 14 has a calibrated radiocarbon date range from 3108–3517 cal BCE (2 $\sigma$ , UBA-32662) and Botai 15 from 3026–3343 cal BCE (2 $\sigma$ , UBA-32663). Unfortunately, there are no detailed osteological reports regarding these individuals. Botai 14 represents one of the male individuals from the multiple burials alongside many horses discovered in 1983. Botai 15 is an isolated find of a cranium.

The third individual to be sampled was recovered from excavations at Botai in 2016 with several of the authors of this paper present. Osteological and archaeological observations regarding this inhumation are presented below.

#### S1.1.1 Osteological analysis:

1. Inventory: Most of the skeleton was present for analysis. Notable elements that were missing included the right tibia and fibula as well as most of the left hand bones. The majority of the vertebrae and ribs were present, though fragmented, and some were displaced, notably the axis and atlas.
2. Preservation: The general bone preservation was poor varying between (Grade 4 and Grade 5) (74), most likely related to the shallow burial position and to some animal and root disturbance. Overall, the bone surface preservation was not good enough to identify some of the more subtle types of pathological lesions that may have been present (e.g., periosteal new bone formation).
3. Sex: The pelvis had a broad sub-pubic angle (75), the presence of a ventral arc (76), a sub-pubic concavity (76), a medial ischial-pubic ridge (76), and a preauricular sulcus (77). These features are suggestive of a female individual. However, the angle of mandible (75), mandibular ramus (78), and mental protuberance (77) were more indicative of a male; although the nuchal area (77) at the back of the skull was more female in nature. Overall, the morphological characteristics indicated that this was likely to be a female individual, and the genetics confirmed this sex determination.
4. Age: This individual was likely to be older than 45 years of age at time of death, based upon the morphological features of the pubic symphysis (79) and auricular surface (80). Analysis of dental wear (81) indicated that this individual was likely to be middle aged, indicating a slightly younger age of at least 35 years plus.
5. Stature: The female was estimated to be approximately  $1.597 \pm 0.042\text{m}$  based upon measurements extrapolated from the right radius (82) (the only long bone that had not suffered post-mortem fracture in the ground). The individual was relatively slight.
6. Pathologies: Spicules of very discrete new bone formation were evident in left and right maxillary sinuses and are likely to be indicative of sinusitis. The left maxillary first molar had been chipped during life and developed calculus, mineralized dental plaque, at the fracture surface.

#### S1.1.2 Archaeological context

1. The burial was a relatively shallow one, next to a house. The foot end was more deeply buried than the head end. The burial position was not one associated with any particular known burial rite and might be considered to be slightly haphazard, given that the leg positions were not the same in flexion and the right hand was hyperflexed back on itself.
2. A projectile point was recovered from approximately adjacent to the T6 vertebra. This point is of a form consistent with the Eneolithic and made out of a stone material commonly seen worked at Botai. The point was immediately adjacent to the skeleton but not embedded in bone. This point can be interpreted in three ways: (a) this is a victim of violence and the point is associated with their death but was embedded in soft tissue, (b) the point was a grave good, though there are no others, and it is in an abnormal location for that purpose, or (c) it is a Botai point that has only become randomly associated within the deposit.
3. Given the relatively high position in the ground, there was some disturbance of the burial by roots and animal burrows. The displacement of bones was most likely the result of burrowing.
4. Most animal bones in the immediate vicinity were horse bones, but there was also a femur of a European beaver (*Castor fiber* L.).

5. The only material culture associated was the projectile point of Botai type and the skeleton has been radiocarbon dated to a calibrated range of 3368–3631 cal BCE (2 $\sigma$ , UBA-32666), which puts it at the earlier end of the Botai culture range.

### S1.2 Skeletal materials from Sholpan and Gregorievka

Samples from two Early Bronze Age (EBA) (~2200 BCE) skeletons from the vicinity of modern-day Pavlodar, in the River Irtysh region, were also taken. The Botai culture ends at the start of the 3rd millennium BCE. The following 800 years are then relatively poorly understood in this region, with a severe paucity of well-characterized and well-dated sites. However, there are many EBA sites that have been discovered in the last 10 years in the Pavlodar region, including many along the River Irtysh (83) Sholpan 4 and Gregorievka 2 are both EBA funerary sites with stone-lined inhumations in pit-graves under Kurgans (84). The Sholpan 4 skeleton has been radiocarbon dated to a calibrated range of 2468–2619 cal BCE (2 $\sigma$ , UBA-32664) and the Gregorievka 2 individual to 2037–2285 cal BCE (2 $\sigma$ , UBA-32665). The burial form is similar to the Yamnaya of the Pontic steppe, so it could represent migration of Yamnaya people into North Eastern Kazakhstan, replacing earlier Eneolithic populations (27). An alternative hypothesis would be that the EBA formed out of the Eneolithic populations of Northern Kazakhstan but adopted new burial rite forms, potentially through the spread of ideas rather than people.

### S1.3 Okunevo

The Bronze Age Okunevo archaeological culture (~2500–2000 BCE) of South Siberia is characterized by complex burial traditions and art. Okunevo sites were found at the Minusinsk Basin, an area which includes both steppe and taiga environments and is surrounded by mountains. While some authors have suggested that the Okunevo may have descended from more northern tribes that replaced Afanasievo cultures in this region (85), others believe the Okunevo culture was the result of contact between local Neolithic hunter-gatherers with western pastoralists (86). A more extensive description of Okunevo archaeological sites can be found in reference (15).

For the present genetic study we choose 18 samples from 7 kurgans that represent both the Uybat and Chernovaya periods of the Okunevo culture. According to the archaeological data the oldest are 5 samples from Uybat V, kurgan 1, and Uybat III, kurgan 1 (86). Radiocarbon data on two of them (RISE 675 и RISE 677: 2600–2400 BCE) support their early dating. Other samples belong to the Chernovaya period: Okunev Ulus, Verkhniy Askiz, kurgans 1 and 2, Uybat V, kurgan 4, and Syda V, kurgan 3 (86, 87). 8 radiocarbon dates of these samples are within 2300–1900 BCE. The only deviant dating of 2600–2400 BCE was obtained for samples of Syda V, kurgan 3.

### S1.4 Baikal Hunter-Gatherers

For the current study, we have analyzed tooth samples from Lokomotiv, Shamanka, Ust'-Ida, and Kurma, ranging from the Early Neolithic (~5200 BCE) to the Bronze Age (~1800 BCE). In (88) the authors have put forward the following chronology for the prehistory of the Baikal region: Early Neolithic (5503 $\pm$ 14 – 5027 $\pm$ 33 BCE), Middle Neolithic (5027 $\pm$ 33 – 3571 $\pm$ 88 BCE), Late Neolithic (3571 $\pm$ 88 – 2597 $\pm$ 76 BCE), and Bronze Age (1726 $\pm$ 34 – 1726 $\pm$ 34 BCE). The archeological record of the region is marked by the absence of cemeteries during an interval of approximately 1,500 years, with

the suggestion of genetic discontinuity at the level of uniparental markers (89). In reference (15), a more complete description of the material culture of these sites across time is provided.

#### S1.4.1 Lokomotiv

The Lokomotiv cemetery (LOK) was initially discovered in 1897 during the construction of the Trans-Siberian Railway (90). The total area of LOK is estimated to be approximately 5,000 sq. m (91). The site is situated on a promontory at the junction of the Irkut and Angara rivers, approximately 70 km downstream of Lake Baikal, in a downtown park in Irkutsk (52°17.13.N, 104°14.57.E). Since its original discovery, LOK has been excavated on several occasions, mostly in conjunction with various construction projects carried out in and around the park. Between the 1920s and 1950s, 26 graves were excavated (92), but more systematic large-scale excavations were undertaken at LOK only during the 1980s and 1990s, uncovering 59 graves with a total of ~100 individuals (18, 19, 91). Some of these graves were excavated in the section of the cemetery referred to as Lokomotiv-Raisovet (LOR). The cemetery represents the Early Neolithic Kitoi mortuary tradition.

#### S1.4.2 Shamanka II

The Shamanka II cemetery (SHA) is located on the coast of Lake Baikal at its southwest end (51°41.54.N, 103°42.11.E). The cemetery is situated on a narrow peninsula that juts out into the lake in the E-W direction, between the small towns Sliudianka and Kultuk. The site was first discovered in 1962 when 3 graves were found to be eroding away from the cliff of the peninsula. No further fieldwork was done until the 1990s when 7 more graves were rescued from the collapsing cliff. During the 2000s, the cemetery has been excavated by BAP. Including the materials obtained in the 1990s, Shamanka II has produced 97 EN graves of the Kitoi mortuary tradition with about 155 individuals, 12 EBA graves of the Glazkovo mortuary tradition with 10 individuals, and 1 Late Bronze Age grave with 1 individual (88).

#### S1.4.3 Ust'-Ida I

The Ust'-Ida I cemetery (UID) is located on the bank of the Angara River at the mouth of its right tributary, the Ida, ~180 km north of Lake Baikal (53°11.20.N, 103°22.05.E). In the 1950s A. P. Okladnikov recorded 1 grave, and several more were spotted by amateur archaeologists in the mid-1980s (93). From 1987 to 1995, the cemetery was subjected to systematic archaeological excavations directed by V. I. Bazaliiskii (Irkutsk State University). This fieldwork produced 1 EN Kitoi grave, 31 LN Isakovo graves, and 19 EBA Glazkovo graves with 1, 47, and 20 individuals, respectively.

#### S1.4.4 Kurma XI

The cemetery of Kurma XI (KUR), comprised of 26 excavated graves, is located on the northwest coast of the Little Sea area of Lake Baikal, ~12 km northeast of the mouth of the Sarma River XIV cemetery (53°10.45.N, 106°57.46.E). One grave was excavated in 1994 by Irkutsk State Technical University, and the remaining 25 were excavated in 2002 and 2003 by BAP (94). Based on the typological criteria, 6 graves, all with poorly preserved skeletal remains, were classified as Late Mesolithic / EN and the remaining 20 as EBA Glazkovo mortuary tradition.

#### S1.4.5 Chronology

All human skeletal remains examined by BAP are also radiocarbon dated (88). The most recent round of this chronological research has included correction of the conventional  $^{14}\text{C}$  dates for the freshwater reservoir effect and Bayesian modeling of various sets of dates (88, 95–97). Consequently, all individuals included in this study also have associated conventional, corrected, and calibrated  $^{14}\text{C}$  dates presented in the Table S3 together with relevant archaeological and biological information. In most cases, radiocarbon dating confirmed the typochronological assessments.

#### S1.5 Anatolian materials

Kristian Kristiansen, Sachihiro Omura, Süleyman Yücel Senyurt, Fulya Eylem Yediay, Gojko Barjamovic

In this section we provide a compact overview of the skeletal material sampled for sequencing in the present work. For a more comprehensive summary of the main cultural phases of the Caucasus and Anatolia regions from 4000–1500 BCE, see reference (48).

##### S1.5.1 Kaman-Kalehöyük excavations (Kaman, Kırşehir, Turkey)

\*Director: Dr. Sachihiro Omura, Japanese Institute of Anatolian Archaeology, Çağırkan, Kaman, Kırşehir, Turkey

The archaeological site of Kaman-Kalehöyük is situated in the Kızılırmak river basin in Central Anatolia. The main mound measures 280 m in diameter and is 16 m high.

The stratigraphy of the site can be divided into four major sections and several substrata:

- 1) Stratum I Ottoman/Islamic and Byzantine periods (1400–1600 CE)
  - Stratum Ia 1–3: Ottoman Period
  - Stratum Ib 4–5: Byzantine Period
- 2) Stratum II Iron Age and Hellenistic periods (1200–30 BCE)
  - Stratum IIa 1–2: Hellenistic Period
  - Stratum IIa 3–5: Late Iron Age
  - Stratum IIa 6–11: Middle Iron Age
  - Stratum IIC 2–3: Middle Iron Age
  - Stratum IID 1–3: Early Iron Age
- 3) Stratum III Middle and Late Bronze Age (2000–1200 BCE)
  - Stratum IIIa: Late Bronze Age (“Hittite Empire period”) (~1500–1200 BCE)
  - Stratum IIIb: Middle to Late Bronze Age (“Old Hittite period”) (~1750–1500 BCE)
  - Stratum IIIc: Middle Bronze Age (“Assyrian Colony period”) (~2000–1750 BCE)
- 4) Stratum IV Early Bronze Age (2300–2000 BCE)
  - Stratum IVa 1–4: Intermediate Period
  - Stratum IVb 5–6: Early Bronze Age (~2000–2300 BCE)

Context Stratum Ia (Ottoman Samples)

**MA2195 (FEY1):** HS 12-01, 12 07 24, South, Sector L Female, 35–45, Ottoman Ia

**MA2196 (FEY2):** HS 08-07, 08 07 17, North, Sector XXXV, Grid XLIX-48 (99), Provisional Layer 3 Juvenile, 7–8, Ottoman Ia

Context Stratum IIa1–2 (Hellenistic Period Samples)

The Iron Age levels at Kaman-Kalehöyük—including the Hellenistic period—can be divided into 4 architectural substrata from IIa (youngest) to IID (oldest). Substratum IIa can be divided into 5



chronological units based on ceramics. From youngest to oldest these are IIa1–2, IIa3–5, IIab–IIc1, IIc2–3, and IId1–3. In unit IIa1–2 (Hellenistic Period) both human and animal skeletons were found in pits. These fall into 3 different burial types: some containing only animal skeletons, others containing only human skeletons, and some with mixed human and animal skeletons.

**Pit P1156** in the North Sector XV: a human skeleton was buried in a flexed position. Human and animal bones were apparently deposited together deliberately. Such burial features appear only in stratum IIa1–2 and may be correlated with a population change as well as possibly linked to incoming Galatians like at Gordion.

One of the pits **P1056** in sector XV also belongs to the Hellenistic Period.

**MA2197 (FEY3):** P1056 94 07 11 North, Sector XV, Grid XXXVI-52 (5) Provisional Layer 10, Hellenistic period. A skeleton of a juvenile aged 5–6 years came from P1056 was found alongside a small pig and four half-complete ceramic vessels.

**MA2198 (FEY4):** P1156 94 09 08, North, Sector XXVII, Grid XLVI-52 (67) B+C (Female C), Hellenistic Period, stratum IIa1–2

Context Stratum IIIb (“Old Hittite Period” Samples)

Based on findings, such as pottery and seals, stratum IIIb can be dated to the late part of the 2nd millennium BCE contemporary with the emergence of the Hittite state (1990 excavation reports).

**MA2200-01 (FEY6):** HS 89-01, 89 08 17, Sector III, Grid XLI-54 (C), Provisional Layer 48 – IIIb – Old Hittite Period. A partial skeleton was found in the west of section C together with an adult skeleton. Only the upper part of the first skeleton (skull, arms) was preserved (Kaman-Kalehöyük Field Notes 1994).

**MA2203-04 (FEY8):** 535 950810, North, Sector VI, Grid XXXIV-54 (M), Provisional Layer 61, Old Hittite Period. Skeleton HS95-35 belonging to a juvenile was found after removing room R141 on top. This layer is next to room 161, which is contemporary with stratum IIIb.

Context Stratum IIIc (“Assyrian Colony Period” Samples)

The Middle Bronze Age at Kaman-Kalehöyük represented by stratum IIIc yields material remains (seals and ceramics) contemporary with the international trade system managed by expatriate Assyrian merchants evidenced at the nearby site of Kültepe/Kanesh. It is therefore also referred to as belonging to the “Assyrian Colony Period” (98). The stratum has revealed three burned architectural units, and it has been suggested that the seemingly site-wide conflagration might be connected to a destruction event linked with the emergence of the Old Hittite state (99). The first burned architectural unit includes Rooms 148, 150, 298, 305, and 306. The second includes Room 153 and 208. The two units were excavated between 1994 and 2003. The third unit includes Room 367 and 370 and was excavated in 2004. Omura (100) suggests that the rooms could belong to a public building, and that it might even be a small trade center based on the types of artifacts recovered. Omura (100) has concluded that the evidence from the first complex indicates a battle between 2 groups took place at the site. It is possible that a group died inside the buildings, mostly perishing in the fire, while another group died in the courtyard.

**MA2205 (FEY9):** HS 11-1, 110705, North, Sector VIII, Grid XXX-55 (WW), Provisional Layer 75, Assyrian IIIc. Skeleton HS 11-01 was found in Sector (opening) VIII under a floor between Pit 1913 and Pit 3117 near pit 3117. It is thought to be a child based on its small size.

**MA2206 (FEY10):** 940826 **S1 (Skeleton1)**, W4-W7 North, Sector I, Grid XLV-54 (GG) Provisional Layer 27, Assyrian IIIc. Room 153 belongs to one of the burnt architectural complexes that were excavated from Sectors 0, I, XXI, and XXII, and it is associated with the other burnt rooms dating to the Assyrian Colony period. Human skeletons were found between the exit of Room 153 and Wall 6 (Kaman-Kalehöyük Field Notes 1994).



**MA2208-09 (FEY12):** 940826, **S2 (skeleton 2)**, North, Sector I, Grid XLV-54 (GG), Assyrian IIIC. The sample comes from the same location as MA2206 above. There were 2 additional skeletons (S3 and S4) found here for a total of 4 individuals. They are thought to represent an opposing group fighting the individuals in Room 153. The skeletons fell on top of one other. They were not damaged by the fire.

#### S1.5.2 Ovaören excavations (Nevşehir, Turkey)

\*Prof. Dr. Süleyman Yücel Şenyurt, Gazi University, Faculty of Arts, Department of Archaeology, Ankara/Turkey, Email: senyurt63@gmail.com

The multi-period archaeological site of Ovaören site is located in the Nevşehir Province, 20 km south of the Kızılırmak River. The site measures ~500 by ~350 m and consists of three areas main: Yassıhöyük (mound), Topakhöyük (mound), and its large terrace settlement (Fig. S2).

The main mound of Yassıhöyük was enclosed by a city wall 1250 m long during the Late Bronze Age (~1650–1150 BCE) and Middle Iron Age (~950–550 BCE). The Middle Iron Age layers represent a center in the region known as Tabal and belong to the Neo-Hittite cultural sphere (101). Later settlement on the mound dates to the Persian, Hellenistic, and Roman periods, but remains of these periods are mostly scanty.

Excavations conducted in 2013 on the terrace settlement beneath Topakhöyük revealed a number of skeletons in trench GT-137 from an Early Bronze Age context. The trench held 5 m of cultural deposit divided into 6 layers. Although no architectural evidence dated to the Middle Bronze Age was detected in the topmost layer (I), some trace of occupation was indicated by thrash pits that had been sunk into the Early Bronze strata from above. Two stone cist graves (M3 and M4) were found below 30 cm of cultural fill of layer I. Both lacked a cover slab, were empty, and probably robbed (102).

Layer II of GT-137 is represented by architectural remains as well as a mixture of Middle Bronze Age and Early Bronze Age pottery.

Layer III of GT-137 is characterized by large ash pits and scattered stones, especially at the eastern end of the trench, probably constituting a dump. An interesting feature in layer III was a planned cesspit 2 m wide by 2.5 m deep with an inner face created by a single line of stones. Finds, such as a tankard, *depas amphikypellon*, and sherds of wheel-made plates as well as Syrian Bottles date the stratum to the Early Bronze Age III

Layer IV of GT-137 likewise dates to Early Bronze Age IIIa based on architectural remains and finds, such as a bronze toggle pin, wheel-made plates, Syrian Bottles, and *depas amphikypellon*.

Layer V of GT-137 was the richest in terms of architectural finds and dates to the Early Bronze Age II. In this layer, 2 different structures and a well were uncovered. The well was filled with stones, pottery, and human skeletons (Figs. S2 and S3). In total, skeletons belonging to 22 individuals, including adults, young adults, and children, must belong to the disturbed Early Bronze Age II graves adjacent to the well (103). Pottery and stones found below the skeletons demonstrate that the water well was consciously filled and closed. The fill consists of dumped stones, sherds and skeletons, and the closing stones demonstrate that the water well was consciously filled and cancelled.

Samples from Ovaören-Topakhöyük:

**MA2210:** G-137, the well of layer V, individual no. 12.

**MA2212:** G-137, the well of layer V, individual no. 2.

**MA2213:** G-137, the well of layer V, individual no. 10.

## S1.6 Turkmenistan samples

### S1.6.1 Namazga samples

Vyacheslav Moiseyev, Andrey Gromov

Peter the Great Museum of Anthropology and Ethnography (Kunstkamera), RAS.

Whereas most of current Turkmenistan was occupied by deserts during the Holocene, favorable climatic conditions and a good water supply in its southern part meant that agriculture appeared in the area ~5000 BCE. Most Eneolithic sites of Southern Turkmenistan are concentrated in the river valleys north of the Kopet Dag Mountains. The abundant natural flora and fauna in this area included wild fruit trees, wine, barley, sheep, and goats, which formed the basis for introducing agriculture and animal husbandry.

It is generally agreed that the Eneolithic of Southern Turkmenistan resulted from developments in the Neolithic Jeitun culture (104). Most sites of Southern Turkmenistan are multilayer settlements occupied from the Neolithic to the Bronze Age and later. The archaeological periodization of the Southern Turkmenistan Eneolithic is based on correlation of pottery types with cultural layers. In contrast to adjacent Neolithic cultures, Turkmenistan Eneolithic and later Bronze Age pottery were decorated with painted ornaments. The etalon periodization scheme was suggested by B. A. Kuftin and is based on a study of ceramic types from Namazga Depe and Anau settlements. This includes 4 Eneolithic pottery complexes of Anau 1a, Namazga I–III, and 3 Bronze Age complexes of Namazga IV–VI (105, 106). This scheme with several amendments is still in wide use.

The data on early agricultural cultures of Eastern Europe and the Caucuses suggest close interactions between early farmers and ancient pastoralists of the Eurasian steppe zone (107). In the case of Southern Turkmenistan, these would be Yamnaya, and later, Andonovo groups. The first evidence of influence of Yamnaya-Catacomb cultures adjacent to Turkmenistan territories was reported in the 1960s for the Zamanbaba burial site located in the Zarafshan area of modern Uzbekistan (108). This finding was proved by later excavations in the Zarafshan. At present, it is generally agreed that local Neolithic Kelteminar population of the Zarafshan area in the Eneolithic and later times maintained contact with both steppe pastoralists and early farmers of Southern Turkmenistan. Among the main features suggesting influence by Yamnaya (and possibly also Afanasievo) culture on local cultural traditions are such characteristics as single, crouched burials in simple pits graves or graves with a side grave chamber as well as pottery types characteristic to the steppe-zone cultures. Obvious Yamnaya influence in the area was further revealed by a study of the Zhukovo sacral complex 16 km from the city of Samarkand. It has been suggested that one of the main reasons behind the apparent expansion of Yamnaya into the Zarafshan was an abundance of metal resources in the area (109).

### S1.6.2 Kara-Depe

The Eneolithic and Bronze Age settlement of Kara-Depe spanning the end of 5th to the beginning of the 3rd millennia BCE is located 4 km north of the village of Artyk, Akhalsk velayat, Turkmenistan (37.56/59.34). The site was first discovered by A. A. Maruschenko in 1930. It was excavated by B. A. Kuftin in 1952 and V. M. Masson in 1955–1957, 1960, and 1962–1963. The remains of the settlement formed a 15 ha mound, 11.5 m high. The depth of the cultural layers is estimated at 12.5 m.

The Early Eneolithic layers (Namazga I) of the late 5 millennium BCE are represented only by ceramics. For later layers of the same Namazga I period (early 4th millennium) remains of one-room square houses built of raw bricks with painted floors were reported. In the Middle Eneolithic (middle to end of the 4th millennium, Namazga II period), houses still had a single room, but their structure had become more complex. The room was usually divided into a number of sections and had a fenced yard.

Graves were in many cases lined with raw bricks. The deceased were usually buried lying on their side with bent legs. Numerous personal decorations were found, made of silver, gold, turquoise, lapis lazuli, and other kinds of ornamental stones.

The building structure grew more complicated in Late Eneolithic times (Namazga III). The settlement now consisted of one- or two-room houses with additional inner sections and additional compartments forming building blocks. Often these blocks were divided by narrow streets. Some of the most characteristic artifacts of the time are terracotta male and female figurines with complex relief details. While most of the pottery is characterized by monochrome black geometrical ornaments and animal representations of local origin, the presence of imported ceramics from the Southern-Eastern Caspian was also reported (108).

The two samples used for genetic analysis come from burials 42 and 43, matching layers of the Kara 2 (Namazga III period). The grave pit was located lower than the floor of the buildings of the Kara 2 layer, and cut through a Kara 3 cultural layer. The burial place is the largest on Kara-Depa and consisted of 35 inhumations. Graves were lined by raw bricks. Most of the skeletons lay on their right side with bent legs. Only a few pottery fragments were found in the graves.

See reference (48) for an in-depth contextualization of the Namazga and surrounding archaeological cultures.

## S2: Ancient data analyses

Peter de Barros Damgaard\*, Rui Martiniano\*, Jack Kamm\*, José-Víctor Moreno-Mayar\*, Arjun Biddanda, John Novembre, Rasmus Nielsen, Martin Sikora, Richard Durbin\*\*, Eske Willerslev\*\*

\* contributed equally

\*\* corresponding authors

### S2.1 Data generation

74 ancient genomes were generated using state-of-the-art processing of ancient skeletal material: targeting petrous bones or tooth cementum, extracting and building NGS libraries according to approaches described elsewhere (1, 110). However, we coupled these advances to a novel NGS approach by sequencing ancient DNA libraries on the Illumina X10 platform, hereby reducing the sequencing cost considerably. The geographical location of the ancient samples sequenced in the present work is represented on Fig. 1 in the main paper, where we also define the boundaries of western, central, and eastern steppe regions (terrestrial ecoregions shapefile data downloaded from the Nature Conservancy, <http://maps.tnc.org/>). We note that these are present-day geographical limits and may not correspond exactly to the distribution of steppe regions in prehistory.

Briefly, teeth or petrous bones were drilled for either well-preserved cementum or compact otic capsule bone, in the dedicated clean-laboratories (111) of the Centre for GeoGenetics at the University of Copenhagen. The drilled samples were then decontaminated efficiently removing bacterial and fungal DNA using a 30 minute pre-digestion (110) slightly modified to consist of 4.9 mL EDTA and 100 uL Proteinase-K. The DNA was then extracted from the solution using a modified Qiagen PB Buffer binding buffer developed in (1) for binding ultra-short DNA sequences and eluted in 82 uL commercial EB Buffer. Then, 3–4 standard Illumina next-generation sequencing libraries were built per extract using 20 uL extracts per library, according to a modified NEB Next protocol (112). These were amplified using a pool of 4 indexes per library, thus providing the required base complexity for the sequencing of single libraries per lane on the Illumina platform, hereby circumventing “index bleeding”

characteristic of the X platform (113). For all libraries, the Kapa U+ enzyme was used for amplification due to its low GC-bias (114), and all libraries were amplified for 14–18 cycles. Libraries were sequenced in single read mode at the Danish National Sequencing Center using an Illumina HiSeq 2500 to 80 bp, and in paired end mode, 151 cycles (302 cycles total) at the Wellcome Trust Sanger Institute, Hinxton, UK.

In addition to the 74 ancient genomes presented in this study, we also sequenced 41 high-coverage genomes (30X) on the Illumina X10 platform in South Korea (Fig. S5). We merged this novel data with high coverage genomes from previous studies (1, 115). For exhaustive description of genotyping parameters see **Section S2.6**. All saliva samples used for generating high coverage genomes were collected by a close collaborator of the Eske Willerslev research group complying with legal requirements. All donors provided informed written consent stored in Copenhagen. Permission for undertaking the study in the country of the corresponding author in Denmark was obtained according to the Danish National Committee who deemed the study non-notifiable according to the Committee Law paragraph 14. The samples were all anonymized and remain identifiable only by the first author.

In addition, we genotyped 140 individuals from 5 populations in Pakistan (Gujar, Kohistani, Tarkalani, Uthmankhel, and Yusufzai), using the Infinium OmniExpressExome-8 v.1.3 BeadChip array platform. All samples were collected by a member of the Eske Willerslev research group for demographic analyses in the districts of Swat and Dir. All donors provided informed written consent, and permission for undertaking the study in the country of the corresponding author was obtained according to the Danish National Committee who deemed the study non-notifiable according to the Committee Law paragraph 14. We merged this novel data with genotype data from present-day Indian populations (43) and with the merged dataset from (3), which is enriched in individuals with Eurasian ancestry from various time periods ranging between the Mesolithic to the present. The merged dataset consisted of 236811 SNP sites for 1805 individuals from 165 populations.

## S2.2 Raw read processing and mapping

We converted CRAM files containing paired-end sequencing data to interleaved fastq using samtools (116), removing sequences that fail platform and vendor quality checks. Adapter sequences were trimmed using AdapterRemoval2 (117), collapsing overlapping read pairs, trimming Ns and low quality bases (quality threshold 2) as well as selecting reads with minimum length of 30. Single read data was also trimmed using AdapterRemoval2 with the same parameters, except for read collapsing and interleaved input options. Next, we aligned truncated reads to the reference genome hs.build 37.1 using bwa aln (118) -l1024 and bwa samse, and used samtools (116) to keep mapped reads with mapping quality equal or above 30. Read duplicates were removed using Picard MarkDuplicates (<http://broadinstitute.github.io/picard/>), and we added read groups to reads with AddOrReplaceRG. We merged bam files belonging to the same sample, which we then processed with the Genome Analysis Toolkit (GATK) Target Creator (119), providing known indels from the 1000 Genomes followed by Indel Realignment. Finally, we used samtools calmd to generate the MD tag with extended BAQ calculation. Genomic coverage was calculated using qualimap with default parameters (120). We present basic sequencing statistics and post-mortem DNA damage in Table S1.

## S2.3 Contamination estimates

We estimated contamination using two approaches: first, using contamMix (121), an approach that compares the mapping affinities of each mitochondrial read to the consensus sequence of the individual

with the mapping affinities to worldwide dataset of putative contaminants assembled in (122). This approach can be used successfully on all individuals with a mitogenomic coverage > 10X. Secondly, we estimated contamination using a method developed for males in (123) implemented in ANGSD, taking advantage of variation at the X-chromosome to assess contamination. We show estimated contamination values in Table S1.

#### S2.4 Sex determination

We used the Rgamma statistic, i.e., the number of sequences mapping to the Y chromosome divided by the total of number of sequences mapping to sex chromosomes (124) to determine the sex of these ancient individuals (Table S1).

#### S2.5 Relatedness

Including relatives in population frequency-based statistics could lead to incorrect assessments. Secondly, related individuals may be informative for interpretation on social organization. For these reasons, we estimated relatedness between all pairs of individuals using a two-step approach. We first calculate all the outgroup-f3 statistics of the form  $f_3(\text{Individual X, Individual Y; Mbuti})$  in order to identify and flag pairs of individuals with inflated levels of shared ancestry (Fig. S6). To follow up on this method, we estimated biological relatedness between pairs of individuals using LCMLKIN (125) (<https://github.com/COMBINE-lab/maximum-likelihood-relatedness-estimation>). An advantage of LCMLKIN is to use genotype likelihoods instead of genotypes and therefore not assuming that genotypes are ascertained without error. This is of particular importance in ancient DNA studies, where low coverage data is abundant.

First, we selected 300,000 SNPs at random from the Human Origins dataset (42). Next, we called genotype likelihoods at these SNP positions using ‘SNPbam2vcf.py’ provided with LCMLKIN. Finally, we estimated biological relatedness between pairs of individuals using LCMLKIN. Individuals with high relatedness are shown on Table S5.

Having verified that a large number of Okunevo\_EMBA pairs present high levels of relatedness and given that we sampled individuals from 4 distinct burial sites (Syda 5, Uybat, Okunev Olus, and Verkhni Askiz), we wanted to investigate whether these values represented mobility across different communities or instead were the result of temporal and geographic proximity within communities. We plotted pairwise coefficients of relatedness according to geography (Fig. S6) and verify that the highest values were obtained between individuals belonging to the same burial site, in particular those of Verkhni Askiz and Okunev Olus, and we do not see exceptional values of affinity between individuals from different sites. Specifically, the highest values obtained were for individuals belonging to the Verkhni Askiz population with 2 pairs of individuals showing  $\pi_{\text{HAT}}$  of 0.41 (RISE516-RISE672) and 0.48 (RISE515-RISE673) which may imply these are first-degree relatives. Additionally, possible second-degree relatedness, with values around 0.2 were also identified in Verkhni Askiz, but also between 1 pair of Okunev Ulus individuals. The likely explanation for the high relatedness observed between Verkhni Askiz individuals is that they were retrieved from only 2 directly adjacent burials with a span of a mere 100 years. In contrast, the remaining burials span ~400 years.

Four pairs of individuals from the Baikal Lake region also presented high coefficients of relatedness, with each pair of individuals belonging to the same archaeological site: Shamanka\_EBA (DA336 and DA338,  $\pi_{\text{HAT}}$ =0.589; DA334 and DA335,  $\pi_{\text{HAT}}$ =0.388), Lokomotiv\_EN (DA340 and DA341,  $\pi_{\text{HAT}}$ =0.290), and UstIda\_EBA (DA353 and DA361,  $\pi_{\text{HAT}}$ =0.240). Lastly, high



relatedness was also detected in two Namazga\_CA samples (DA379 and DA380) which presented a  $\pi_{\text{HAT}}=0.458$ .

## S2.6 Genotyping

All genomes were genotyped individually using samtools (v1.3.1) mpileup -C50 and bcftools (v1.3.1) using the consensus caller (116). Calls from each genome were filtered for a minimum of 1/3 average depth and a maximum of 2 times average depth, except for the mitochondrial genome, which were filtered for a minimum 10 and maximum 10000 read depth. For males the X and Y chromosome were filtered using half the threshold as for the autosome. The variant calls were subsequently filtered if there were two variants called within 5 nt of each other, for phred posterior probability of 30 and strand bias, end distance bias of  $p < 1e-4$  and read position bias of 0. Additionally, we filtered heterozygote sites if allelic balance for the minor allele was less than 0.25. Per individual calls were merged across all samples using GATK-3.7 CombineVariants (119) to per chromosome files and filtered for deviations from Hardy-Weinberg Equilibrium with  $p > 1e-4$  (126).

## S2.7 Principal Component Analysis

We carried out the PC Analyses on different subsets of populations using 236811 SNP sites previously filtered in (3). These include:

- the full Eurasian panel described in (3), including the novel 74 ancient genomes (Fig. S13; Fig. 2A)
- a subset of the Eurasian panel described in (3), including the novel 74 ancient genomes and the South Asian populations from (43) (Fig. 2B) focusing on the major gradients defining South Asian ancestry
- a subset of the Eurasian panel described in (3) focusing on relevant modern populations from the Altai and Siberia and the ancient genomes (Fig. S23) defining the ANE-to-AEA genetic cline.

We used PLINK 1.9 (127) to perform Principal Component Analyses including the ancient samples in the calculation.

## S2.8 Model-based clustering

We computed model-based clustering analyses on the Eurasian panel in order to explore shared ancestries between the past and present groups. For each  $K = 2$  to  $K = 15$  we computed 20 replicates and we show the admixture proportions for all ranges of  $K$  in Fig. S14. For each value of  $K$ , we estimated the 5-fold cross-validation error based on the maximum-likelihood solution across replicates (Fig. S15). We observe minimum cross-validation error estimates when assuming 6 and 10 ancestral populations. We show admixture proportions for  $K = 6$  in the main text.

## S2.9 D-statistics

We computed allele frequency-based  $D$ -statistics (with *AdmixTools*) to formally test hypotheses about the ancestry composition of different groups in the merged dataset. In brief,  $D$ -statistics of the form  $D(H1, H2; H3, H4)$  are expected to be consistent with 0 if  $H1$  and  $H2$  form a clade in the unrooted tree  $((H1, H2), H3), H4$ . Significant deviations from this expectation may arise due to the proposed tree being wrong, gene flow between the lineages in the tree, or differential error rates



between  $H1$  and  $H2$ . In order to assess the statistical significance of the deviation, we estimated the standard error for each statistic using a weighted block jackknife approach over 5Mb blocks and computed Z-scores for each value of  $D$ . We consider  $D$ -statistics for which  $|Z| > 3.3$  ( $p$ -value  $< 0.001$ ) to be significantly different from  $D = 0$ . Since different groups bear variable error rates mostly derived from post-mortem DNA modifications, we performed this analysis on the complete merged dataset, and a filtered version where we discarded transition polymorphisms.

## S2.10 qpAdm modeling

### S2.10.1 Methods

Following the results presented in previous sections and in the main text, we modeled the admixed ancestry of a set of modern and ancient populations using qpAdm (2), as implemented in *AdmixTools* latest version. This method models a “target” population as a mixture of  $n$  different “source” populations, which are differentially related to a set of  $m$  different “outgroups.” Thus,  $f_4(\text{Target}, \text{Outgroup}_j; \text{Outgroup}_k, \text{Outgroup}_l)$  can be expressed as a weighted sum of all possible statistics of the form  $f_4(\text{Target}, \text{Outgroup}_j; \text{Outgroup}_k, \text{Outgroup}_l)$ . Additionally, qpAdm provides a test for the proposed model via qpWave. This test is meant to assess whether the target and  $n$  source populations derive from at least  $n$  independent “migration streams” from the  $m$  outgroups. Therefore, for each of the proposed models, we first tested if the selected set of outgroups were informative about the different ancestries of a given set of source populations. We tested each model on both the full merged dataset and on a dataset filtered for transition polymorphisms.

### S2.10.2 Assessing outgroup informativeness

For each of the qpWave models described in the main text, we used the following set of outgroup populations genomes:

Ust\_Ishim  
Anzick1  
Kostenki14  
Switzerland\_HG  
Natufian  
Mal'ta (MA1)

Since qpAdm assumes that the source populations are differentially related to the outgroups, we first assessed whether this set of outgroups was informative about the different ancestries carried by the sources. We first computed all possible statistics of the form  $f_4(\text{Target}, \text{Outgroup}_j; \text{Outgroup}_k, \text{Outgroup}_l)$ . If a pair of potential sources is equally related to the outgroups, we expect the  $f_4$ -statistics for this pair to be highly correlated; thus, suggesting that the outgroups are not informative about such sources (42). While we did not find any of the source pairs to yield near perfectly correlated statistics (Fig. S36), pairs such as (CHG, IranN) yielded correlation scores as high as 0.92 indicating that these ancestries might not be optimally identified using our set of outgroups with this approach. In addition, we note that the power will be lower when trying to differentiate between the following pairs:

(Namazga, IranN), cor  $\sim 0.929$   
(Namazga, CHG), cor  $\sim 0.948$   
(Namazga, Turkmenistan\_IA), cor  $\sim 0.938$   
(Steppe\_MLBA, Steppe\_EMBA), cor  $\sim 0.91$   
(CHG, IranN), cor  $\sim 0.929$

For the remaining sources, this test suggests that the set of seven outgroups allows us to confidently differentiate between the different proposed sources. For each model in the main text, we confirmed these results by assessing if the source populations in turn could be expressed as independent “migration streams” from the outgroup populations using qpWave (Table S16). For all models, we found statistically significant evidence ( $p$ -value < 0.05) for the source populations to be differentially related to the outgroup populations. When filtering out transition polymorphisms, we found non-significant qpWave  $p$ -values (Table S17), yet we interpret these results as a consequence of reduced statistical power due to the low number of remaining SNP positions.

#### S2.11 qpGraph shows no evidence of Botai-Yamnaya gene flow

To validate our finding of no Botai-Yamnaya admixture, we used qpGraph (Admixtools <https://github.com/DReichLab/AdmixTools>) to fit a simple admixture graph on Yamnaya, Botai, EHG, CHG, Xiongnu (representing East Asian ancestry), and Mbuti (outgroup), using transversion SNPs and a jackknife block size of .05 Morgans. This graph (Fig. S28) had no direct Botai-Yamnaya gene flow and fit all  $f_4$  statistics ( $|Z| \leq 1.77$ ), agreeing with other results that show no evidence of direct gene flow between Yamnaya and Botai.

#### S2.12 Chromopainter

We extracted from our call set 621,799 positions genotyped in the Human Origins dataset (42). We merged variants in our call set with the Human Origins genotype dataset using PLINK 1.9, and filtering for missingness per individual (--mind 0.51) and missingness per marker (--geno 0.05), resulting in a total of 1,250 individuals genotyped for 581,755 SNPs, including the newly sequenced ancient samples BOT2016 (Botai), Sholpan (Central Steppe EMBA), and Yamnaya Karagash, and the previously published Ust-Ishim (128). We then used SHAPEIT v2.r790 (129) in mode “check” to detect variant alignment errors in our data, which we excluded from the dataset, resulting in 540,070 SNPs. We subsequently phased these genotypes using SHAPEIT with default parameters, providing the 1000 Genomes Phase 3 haplotypes and recombination map as a reference ([http://mathgen.stats.ox.ac.uk/impute/1000GP\\_Phase3/](http://mathgen.stats.ox.ac.uk/impute/1000GP_Phase3/)). Next, we converted phase files with `impute2chromopainter.pl` and converted the 1000 Genomes recombination map with `convertrecfile.pl` into the format required by fineSTRUCTURE. Both of these scripts were downloaded from <http://www.paintmychromosomes.com/>.

We used fineSTRUCTURE v2 (35) (<https://people.maths.bris.ac.uk/~madjl/finestructure/>) to investigate patterns of haplotype sharing in our data. We examined the “chunkcounts” output file produced in our analysis above and estimated the mean haplotype sharing with present-day populations and each one of the 3 newly sequenced high-coverage ancient samples (Fig. S29).

Consistent with previous reports of mass migration of steppe pastoralists into Europe (1, 2), the Yamnaya sample shows a substantial contribution to present-day Europeans, in particular Karelians and Ukrainians. Conversely, Botai shows higher affinity to Yeniseians, Native Americans, Eskimos, Tubalars, Selkups, and other Far Eastern Siberian populations. The affinity between Botai and Eastern and Northern European groups is non-negligible, however when interpreted together with results from other analyses presented in the manuscript, in which we report Botai’s ancestral link to ANE, the observed sharing patterns are likely to derive from the MA1-related ancestry it shares with Yamnaya, rather than from a direct contribution. Furthermore, the intensity of haplotype affinity shared by Yamnaya and West Eurasians is greater than that of Botai to Native Americans, Siberians, or any other

population, which suggests that the first horse domesticators contributed less to the genetic pool of modern populations than the Yamnaya, who have used the horse as a vehicle to spread into West Eurasia. The Early Bronze Age Sholpan sample presented haplotype affinity patterns broadly similar with Botai, with greatest affinity to the Yeniseian and Native American populations, but it is characterized by lower affinity to Europeans. To compare sharing patterns between the 3 samples, we normalized mean haplotype sharing values with present-day populations and present these in a ternary plot (Fig. S30). At the macro population level, Yamnaya has greater sharing with West Eurasians, while both Botai and Sholpan share more haplotypes with Native Americans and Eastern Eurasian populations, but with the latter sample showing greater proportions of Siberian and East Asian ancestry.

To allow for a more detailed comparison at the population level, we plotted pairwise comparisons between Yamnaya and Botai (Fig. S31A) and between Botai and the Sholpan sample (Fig. S31B) and estimated their correlation. Sholpan's patterns of mean haplotype sharing are more correlated with Botai's ( $r = 0.58$ ), and this value is greater than the correlation between Botai and Yamnaya ( $r = 0.51$ ). This may imply that despite ANE ancestry being present at different levels in these samples, both Sholpan and Botai are more related to MA1 than Yamnaya is, and that Yamnaya contains CHG ancestry, which further differentiates it from the 2 samples. In this detailed comparison, Sholpan shows greater affinity with certain Far Eastern populations than Botai, in particular with the Eskimo, Koryaks, Chukchis, and Yakuts as well as with Altai populations and Mongolic-speaking peoples.

To examine geographic differences in haplotype sharing with present-day populations between Botai and Yamnaya, we estimated the total variation distance statistic (130) (Fig. S32). The size of the circles highlights the magnitude of differences, while the color represents total contribution. We observe that Botai and Yamnaya differ in the amount of sharing with East Asians, with Botai showing higher values, but that the overall sharing of Botai and East Asians is very reduced, indicating small proportions of East Asian related ancestry in Botai not present in Yamnaya, consistent with the cline of ancestry shown on Fig. 2. On the other hand, with Native American populations, we observe large magnitude differences between Yamnaya and Botai, but, in this case, Botai shares a substantial amount of haplotypes with these populations.

### S2.13 SFS-based modeling

In this supplement we describe how we used the site frequency spectrum to infer the model in Fig. 4 of the main text.

We followed a strategy of fitting a succession of increasingly complex demographic models. In particular, we fit the following models: (a) a small model for the demographic history of Yamnaya ancestry, (b) a slightly larger model for 3 central Eurasian steppe populations and a Baikal population, and (c) a large, 10-leaf model based on combining the first two models.

Our demographic models consisted of samples from 10 populations: YamnayaKaragash\_EBA, SidelkinoEHG\_ML, Botai\_CA, CentralSteppe\_EMBA, Okunevo\_EMBA, MA1, KK1, Shamanka\_EN (Lake Baikal), Mbuti, and Han. For YamnayaKaragash\_EBA, Botai\_CA, and CentralSteppe\_EMBA, we used a single sample, excluding the low-coverage samples with less than 9x coverage. KK1 also consisted of a single ancient sample. We used 2 samples each from the modern Mbuti and Han populations.

MA1, SidelkinoEHG\_ML, Okunevo\_EMBA, and Shamanka\_EN each consisted of only low-coverage samples (less than 9x coverage). For each low-coverage sample, we chose a random allele at each SNP where there was at least 1 read with mapping quality  $\geq 33$ . While SidelkinoEHG\_ML and MA1 each consisted of a single sample, Okunevo\_EMBA and Shamanka\_EN contained many samples; to speed up the likelihood computation, we downsampled each SNP to have 4 random alleles from

these populations. To adjust for the fact that we did not ascertain SNPs within the low-coverage samples, we only considered SFS entries that were polymorphic within the high-coverage samples and adjusted the denominator of the SFS so that all entries represented *conditional* probabilities, conditioning on the high-coverage samples being polymorphic.

In the remainder of this supplemental section we will usually refer to these populations by shortened names, so that they fit more easily in the figures. These shortened names are “Yamnaya”, “Sidelkino”, “Botai”, “Sholpan”, “Okunevo”, and “ShamEN”. Sholpan is the site of the 9x-coverage CentralSteppe\_EMBA sample; the other shortened names are self-explanatory.

We used the method momi (28) to compute expected SFS values under the multipopulation coalescent, which were then combined into a composite likelihood, where the observed SFS was modeled to be drawn from a multinomial distribution, while the total number of heterozygotes per individual were modeled as independent Poisson variables (we used heterozygotes per individual, rather than the total number of SNPs in the dataset, because it is easier to account for the effect of missing data). Demographic models were then inferred by performing gradient descent to maximize this composite likelihood. To estimate confidence intervals, we used the parametric bootstrap with 300 simulations. We also used the parametric bootstrap to estimate the bias and standard deviation of our estimates.

For all models, we assumed a generation time of 29 years, and a mutation rate of  $1.66 \times 10^{-8}$  per base per generation, based on 2 recent estimates of the mutation rate (131, 132).

#### S2.13.1 A simple model for Yamnaya ancestry

We began by fitting a simple 4-population model relating KK1, Sidelkino, Botai, and Yamnaya, shown in Fig. S16. The model included the following population admixture and split events:

1. An admixture event, where Yamnaya is formed from a CHG population related to KK1 and an ANE population related to Sidelkino and Botai. We inferred 54% of the Yamnaya ancestry to come from CHG and the remaining 46% to come from ANE.
2. A split event, where the CHG component of Yamnaya splits from KK1. The model inferred this time at 27 kya (though we note the larger models in Sections S2.12.4 and S2.12.5 inferred a more recent split time).
3. A split event, where the ANE component of Yamnaya splits from Sidelkino. This was inferred at about 11 kya.
4. A split event, where the ANE component of Yamnaya splits from Botai. We inferred this to occur 17 kya. Note that this is above the Sidelkino split time, so our model infers Yamnaya to be more closely related to the EHG Sidelkino, as expected.
5. An ancestral split event between the CHG and ANE ancestral populations. This was inferred to occur around 40 kya.

We found that specifying a separate population size along each branch led to an over-parametrized model, with identifiability issues and runaway behavior. We thus fit a model with 4 population sizes:

1. A population size along the Botai leaf branch.
2. A population size along the KK1 leaf branch.
3. An ancestral population size at 100 kya.
4. A shared “Eurasian” effective population size along all other internal branches.

We summarize the inferred parameters, along with bootstrap estimates of bias, standard deviation, and 95% confidence intervals, in Table S6. In Fig. S17, we plot the bootstrap distribution of the difference in split times between Yamnaya and Botai/Sidelkino and can reject the hypothesis that Yamnaya split from Botai after Sidelkino at 95% confidence level.

### S2.13.2 No significant Botai-Yamnaya gene flow detected

We used 2 approaches to investigate whether we could detect additional gene flow from Botai to Yamnaya related to the spread of horse domestication. First, we added extra pulses between Botai and Yamnaya and checked whether the inferred pulse strength was significantly different from 0. Second, we checked whether the model without gene flow could adequately fit statistics of excess allele sharing between Yamnaya and Botai. In both approaches, we found no significant signal of gene flow between Botai and Yamnaya.

In the first approach, we tried adding additional pulses between Botai and Yamnaya and re-estimating the MLE (Fig. S18). When adding a Yamanaya->Botai pulse, we inferred no gene flow (pulse strength of 0%). Adding a Botai->Yamnaya pulse, our model inferred a small amount of gene flow (pulse strength of 4.8%), but this was not significantly different from 0 (p-value .18) under 300 parametric bootstraps simulated under the null model without admixture.

In the second approach, we used a modified version of Patterson's "ABBA-BABA"  $f_4$  statistic (133) to test for significant excess sharing between Botai and Yamnaya. In particular, drawing a single random allele from each of 4 populations  $P_1, P_2, P_3, P_4$ , let BABA be the number of SNPs where  $P_1 = P_3 \neq P_2 = P_4$ , and similarly let ABBA be the number of SNPs where  $P_1 = P_4 \neq P_2 = P_3$ . Then  $f_4 = \frac{BABA - ABBA}{N}$

is the difference in the BABA and ABBA counts, normalized by some appropriate constant  $N$ . If the populations are related by the unrooted topology  $((P_1, P_2), (P_3, P_4))$ , then  $f_4 \gg 0$  indicates excess BABA-type incomplete lineage sorting, due either to admixture between  $P_1$  and  $P_3$ , or between  $P_2$  and  $P_4$ .

$f_4$  is simply a statistic of the SFS, and so we can check whether the  $f_4$  statistics of the observed SFS match the  $f_4$  statistics of the expected SFS. Note this is similar to the approach of qpGraph (133) for checking whether  $f_4$  statistics of admixture graphs match the data. However, qpGraph assumes that mutations are old and occurred in the root population, and it requires SNPs to be ascertained within an outgroup; whereas here we consider the effects of all SNPs, including those from recent mutations.

To check for admixture between Botai and Yamnaya, we compared ABBA-BABA counts for quadruples (Yamnaya, Sidelkino; Botai, X), varying the value of X. A relative excess of BABA counts (compared to the model expectation) indicates excess allele sharing between Botai and Yamnaya that is not shared by Sidelkino. However, instead of using the usual  $f_4$  statistic, which is based on the difference of BABA and ABBA counts, we used a modified version of it, which we denote by  $f_4^*$ , and define as

$$f_4^* = \log(\text{BABA}) - \log(\text{ABBA}) = \log\left(\frac{\text{BABA}}{\text{ABBA}}\right).$$

That is, instead of using the difference of BABA and ABBA counts, we use the difference of their logarithms.  $f_4^*$  is robust to certain biases that may affect  $f_4 = \frac{BABA - ABBA}{N}$  through the normalization constant  $N$  (the total number of observed SNPs). In particular, missing data or reference bias may cause a decrease in observed singletons, especially in lower-coverage individuals, leading to a decrease in the total number of SNPs. By contrast,  $f_4^*$  only depends on BABA and ABBA counts, which require 2 copies of each allele and thus are not affected by singleton counts.

To compute the empirical  $f_4^*$ , we counted the number of BABA and ABBA SNPs in every subsample of 4 alleles and took the log-ratio. To compute residuals, we compared this with the log ratio of BABA and ABBA probabilities, dividing by the standard error of  $f_4^*$  under a block jackknife with 100 blocks. We denote this normalized residual by  $Z^*$ , so



$$Z^* = \frac{\log(BABA/ABBA) - \log(P(BABA)P(ABBA))}{SD(\log(BABA/ABBA))}$$

For the model in Fig. S16 (without Yamnaya-Botai admixture), we found that the residuals of  $f_4^*(\text{Yamnaya}, \text{Sidelkino}, \text{Botai}, X)$  were not significantly positive for  $X \in \{\text{KK1}, \text{AncestralAllele}\}$ , as shown in Table S7.

In addition, in Sections 2.13.4 and 2.13.5 below, we consider larger models that includes 6 additional populations (Mbuti, MA1, Sholpan, Shamanka EN, and Han), shown in Figs. S19 and S20. Most notably, these models account for East Asian ancestry in Botai, which is not considered in the model in Fig. S16. We checked the residuals of  $f_4^*(\text{Yamnaya}, \text{Sidelkino}, \text{Botai}, X)$  for these larger models; none of these residuals were significantly positive (Tables S9 and S11), consistent with a model of no recent genetic admixture between Botai and Yamnaya.

### S2.13.3 Modeling the central Eurasian steppe 5,000 years ago

We next examined 3 related populations from the central Eurasian steppe 4–5.5 kya (Botai, Sholpan, and Okunevo), as well as an Ancient East Asian (AEA) population from Lake Baikal 7 kya (Shamanka Early Neolithic). For this model, we also included modern Mbuti and Han samples as well as the ancient MA1 sample from Siberia 24 kya.

We modeled the 3 steppe populations as a mixture of ANE and East Asian ancestry but with Botai having more ANE ancestry than the Okunevo and Sholpan samples. We based this model on several exploratory models for subsets of these populations, as well as PCA and qpAdm results that showed these 3 steppe populations to be closely related and intermediate between ANE and East Asian samples.

More specifically, we modeled the 3 steppe populations as splitting off from a “ghost” ANE population at time  $T_{\text{Steppe-GhostANE}}$ , and receiving a pulse of East Asian ancestry at time  $T_{\text{AEA} \rightarrow \text{Steppe}}$  shortly thereafter. We modeled this East Asian pulse as coming off the ShamankaEN branch. Later, the Botai population is formed at time  $T_{\text{Botai}}$  from an additional admixture event between the Steppe and GhostANE, while the Okunevo and Sholpan populations split from each other at  $T_{\text{Sholpan-Okunevo}}$ .

Additional split times in the model are  $T_{\text{Han-ShamankaEN}}$  for the split between Han and ShamankaEN,  $T_{\text{MA1-GhostANE}}$  for the split between MA1 and GhostANE,  $T_{\text{AEA-ANE}}$  for the split between East Asian and ANE populations, and  $T_{\text{Mbuti-Eurasia}}$  for the split between Mbuti and Eurasian populations. For the population size parameters, we generally inferred separate population sizes at leafs with high-coverage samples, while sharing population size parameters at low-coverage leafs with internal branches. Specifically, the high-coverage samples in Mbuti, Botai, Sholpan, and Han have effective sizes  $N_{\text{Mbuti}}$ ,  $N_{\text{Botai}}$ ,  $N_{\text{Sholpan}}$ ,  $N_{\text{Han}}$ , respectively, while ShamankaEN and the ShamankaEN-Han ancestor have size  $N_{\text{Han}}$ , Okunevo and the Botai-Okunevo-Sholpan ancestor have size  $N_{\text{Steppe}}$ , MA1 and GhostANE have size  $N_{\text{ANE}}$ , the AEA-ANE ancestor has size  $N_{\text{Eurasia}}$ , and the Mbuti-Eurasian ancestor has size  $N_{\text{Ancestral}}$ .

We show the inferred maximum-likelihood model in Fig. S19 and bootstrap confidence intervals in Table S8. Specifically, we inferred the steppe populations to have 51% East Asian ancestry and 49% ANE ancestry, with Botai having an additional pulse of 40% ANE ancestry (for a total of  $.49 + .51 \cdot .4 \approx 0.69$  of Botai ancestry coming from ANE). We inferred the admixture and divergence events relating Botai, Sholpan, and Okunevo to occur ~10–13 kya and inferred the divergence of ShamankaEN from Han ~17.5 kya.



#### S2.13.4 Combining the Yamnaya and central steppe models

We next constructed a large, 10-leaf model that combined the Yamnaya-focused model of Fig. S16 with the central Eurasian steppe model of Fig. S19. We show this model in Fig. S20.

More specifically, we constructed this model by starting with the model in Fig. S16, then adding on the Sidelkino, KK1, and Yamnaya leafs. Yamnaya was modeled as a mixture of Sidelkino with a CHG population related to KK1. We found the likelihood surface for the time of this admixture to be very flat, so we did not estimate this parameter, simply fixing it to occur at the time of the Yamnaya sample.

Compared to the central steppe model in Fig. S19, the divergence time of the central steppe populations decreased slightly, as did the MA1 divergence time; however, the Han-ShamankaEN, ANE-AEA, and Mbuti-Eurasian divergence times remained essentially the same. The ANE and AEA admixture proportions within the central steppe populations also changed by about 5 to 10%. Compared to the Yamnaya focused model in Fig. S16, the KK1-Yamnaya divergence time decreased to about 20 kya, but the KK1-ANE divergence time remained about the same (at ~40 kya), and the Yamnaya admixture proportions also remained essentially the same.

As discussed in Section S2.13.2, we checked whether there was excess Yamnaya sharing with Botai not accounted for by Sidelkino by examining the ratio of ABBA-BABA counts. The  $f_4^*$ (Yamnaya, Sidelkino, Botai, X) statistics (as defined in Section S2.13.2) are listed in Table S10. None of these  $f_4^*$  statistics was significantly positive, consistent with a model of no recent genetic admixture between Botai and Yamnaya. However,  $Z^*$ (Yamnaya, Sidelkino, Botai, Okunevo)  $\ll 0$ , suggesting excess allele sharing between Yamnaya and Okunevo, which agrees with both qpAdm results suggesting a Yamnaya-like contribution to Okunevo, and the geographic proximity of Yamnaya-related Afanasievo settlements to subsequent Okunevo settlements.

#### S2.13.5 Adding a Yamnaya->Okunevo pulse

Based on the  $Z^*$ (Yamnaya, Sidelkino, Botai, Okunevo)  $\ll 0$  statistic in Table S9 as well as parallel lines of evidence from qpAdm and archaeology, we added a pulse from the Yamnaya to Okunevo leafs, resulting in the model in Fig. S21. The model inferred a 16% contribution from Yamnaya to Okunevo. The MLE point estimate and 95% parametric bootstrap confidence intervals are summarized in Table S10. We also show the  $f_4^*$ (Yamnaya, Sidelkino, Botai, X) statistics in Table S11; none of these statistics was significantly different from 0 at the 95% level after a Bonferroni correction.

#### S2.13.6 Robustness of results to errors in medium-coverage ancient samples

A possible complication of fitting the SFS with an explicit coalescent model is that the SFS can be affected by damage, such as inflated singleton counts. When fitting the models above, we addressed these distortions in two ways. First, we excluded SNPs that are transitions, thus excluding false C->T mutations caused by deamination. Second, we did not ascertain SNPs within the samples with less than 9x coverage: MA1, Sidelkino, Okunevo, and ShamankaEN. We required all SNPs to be polymorphic when restricted to the higher-coverage samples, computing the SFS *conditional* on this ascertainment scheme. Note this automatically excludes all singletons within the low-coverage samples, since such SNPs would not be polymorphic within the higher-coverage samples.

In the ascertainment scheme above, SNPs were ascertained within Mbuti, Han, Yamnaya, KK1, Botai, and Sholpan. While Mbuti, Han, and Yamnaya are very high coverage (>20x), the Sholpan (9x), KK1 (11x), and Botai (14x) samples have modest coverage and are potentially susceptible to errors in

ascertainment. We thus reran our results, excluding these medium-coverage ancient samples from the ascertainment scheme. Our inferred demography is shown in Fig. S22, and it is nearly identical to the demography in Fig. S21. The biggest difference between the demographies in Figs. S21 and S22 is that the KK1-Yamnaya split time increases by a few thousand years, from ~20kya to ~24kya.

The similarity between Figs. S21 and S22 suggests the singleton counts for the medium coverage ancient samples are not distorted sufficiently to substantially change the outcome of the analysis, and that excluding the low-coverage samples (<9x) from ascertainment was sufficient to control for ascertainment error.

## S2.14 Uniparental marker analysis

### S2.14.1 Y-chromosome analysis

#### S2.14.1.1 Variant calling and haplogroup determination

We called Y-chromosomal variants in 45 ancient and 103 modern samples (Section S2.1) using bcftools (<http://www.htslib.org/doc/bcftools.html>) (134) mpileup and bcftools call emitting all sites within mappable Y-chromosomal regions (135). Haplogroup determination was done with the script callHaplogroups.py distributed with Yhaplo (136), with the parameter --ancDer, which outputs the allele counts for ancestral and derived SNPs along a path of branches of the Y-chromosome tree. In total, approximately 20,000 phylogenetically informative SNPs from the ISOGG 2016 database ([http://isogg.org/tree/ISOGG\\_YDNA\\_SNP\\_Index.html](http://isogg.org/tree/ISOGG_YDNA_SNP_Index.html)) were used for haplogroup determination. Given the low coverage of the ancient DNA samples and the effect of deamination on lineage determination, we manually inspected ancestral and derived alleles to evaluate their phylogenetic consistency, ensuring that the lineages identified were the most likely considering the data observed. Y-chromosome lineages are presented in Table S13 as well as ancestral and derived counts in Table S14.

#### S2.14.1.2 Y-chromosome phylogeny

We investigated Y-chromosomes in our dataset by first selecting 103 present-day individuals from Africa, Eurasia and the Americas, including the ones newly sequenced in the present work and 6 additional high-coverage ancient samples: Yamnaya (present study), Clovis (137), Ust-Ishim (128), Saqqaq (138), KK1 (7), and BR2 (139). We filtered heterozygous SNPs from this dataset to remove potential deamination and errors and selected variants with exactly 2 alleles, minimum allele count of 1, depth of coverage  $\geq 5$  and genotyping rate 0.97, and restricted variants within callable regions of the Y-chromosome. This resulted in a VCF file with 19534 SNPs, which we converted to tab format with vcf-to-tab (9), and then to multi-fasta with vcf\_tab\_to\_fasta\_alignment.pl (<http://code.google.com/p/vcf-tab-to-fasta>). Next, we performed MUSCLE alignment (140) and built a maximum likelihood tree using MEGA7 (141), which we re-rooted on the African main clade A, to which 2 San and 1 Mbuti individuals belong.

#### S2.14.1.3 Adding low-coverage ancient branches to a tree estimated with high-coverage Y-chromosomal data

The ancient DNA (aDNA) field is abundant in low/medium-coverage data, but considering the difficulties inherent to estimating accurate phylogenies from it, datasets with large number of ancient samples are rarely represented in the form of a tree. Therefore, we aimed to incorporate low-coverage

ancient samples into a pre-computed Y-chromosome tree with high-coverage modern and ancient samples.

The main idea behind this approach is that haplogroup names identified in aDNA samples can be informative about their relative position on the tree. For example, a given sample carrying the M269-R1b1a2 lineage should be placed within the same clade as other R1b1a2-derived individuals. In the case where further downstream markers are not available for that particular sample, which would allow placing it at a more specific branch, the upper bound of confidence for placing the ancient sample would be at the node of all clade(s) containing R1b1a2-derived individuals. Based on this premise, we tried to map a set of Y-chromosome lineages identified in ancient samples to the most related lineages in a tree estimated with high-coverage data.

2 data structures are required: a tree estimated with high-coverage samples and a list of haplogroups identified in ancient low coverage individuals. First, we label each branch of the computed tree with the haplogroup identified for each one of the samples. Next, for each haplogroup in the list of ancient samples, we first attempt to identify matches in the lineages present in the tree. In the event that a single exact match is found, we replace that tip with a subclade containing the ancient sample lineage and the matching tip, as these samples are likely to form a clade in a Y-chromosome tree. In the case of multiple exact matches to the tips of the tree, the ancient sample is added to the node ancestral to those tips—i.e., the most common recent ancestor. In the case where no exact matches were found, we trim the query haplogroup identified in the ancient sample by 1 letter (for example, instead of searching for ‘R1b1a2a2’, we would now try to match ‘R1b1a2a’) and repeat the process, until one, or several partial matches have been identified. Given we are dealing with large amounts of missing data, we opted for the most conservative approach of binding ancient DNA samples to ancestral nodes containing all matches, than directly to the matching tips. The reason for this is simply because sequencing more data could reveal that a given sample belongs in reality to a more downstream branch of the tree. In this way, we only provide the upper bound of where we can confidently map ancient samples to the phylogeny. Using this procedure, we inserted 44 ancient DNA samples (40 from the present study and MA1 (26), Kennewick (142), Loschbour (65), and Bichon (7)) into a tree estimated with high-coverage sequences. Sample mapping to tree locations was confirmed by examination of ancestral and derived SNPs at the branches of the high coverage phylogeny.

In the cases where it was not possible to identify a fully resolved Y-chromosome lineage for a particular sample, the placement of ancient samples in a pre-existing phylogeny may still provide insights into population affinities and biogeographical distribution of ancient and modern haplogroups.

#### S2.14.1.4 Visualizing ancestral and derived SNPs

Given the incompleteness typical of low coverage ancient DNA data, full Y-chromosome haplotype resolution was not possible for the majority of our samples. With this in mind, we generated a visual representation of allele status and missing data at important branches of the tree for ancient and modern samples in our dataset.

Yhaplo’s default behavior uses a decision table, which specifies the number of ancestral and derived SNPs required to continue traversing the tree and which nodes to visit. In this mode, the output only includes derived and ancestral alleles observed in the tree path travelled for lineage assignment. We altered the code of Yhaplo so that positions with missing data (no alleles observed) were also outputted in addition to derived and ancestral alleles.

We used the `table4phylo` function of the R package `adephylo` at each node to generate a table of allelic state at each branch of ISOGG Y-chromosome tree for each haplogroup. Next, we plotted the ISOGG Y-chromosome tree for the relevant nodes to which our ancient samples belong including the

aforementioned table with allele status information for each branch. Trees with allelic information for the N and Q clades to which the majority of our ancient samples were assigned are shown on Fig. S24.

#### S2.14.1.5 Limitations

We present an automated solution for incorporating low-coverage ancient samples into confident Y-chromosome phylogenies, which allows examining phylogenetic affinities with the available data. There are a few limitations inherent to our approach: first, when calling Y-chromosomal variants from low-coverage sequence data, not all lineage defining markers are covered by reads, and, therefore, aDNA samples may be positioned at more ancestral nodes in the tree when, in reality, more data could reveal that they may belong to a better resolved branch of the Y phylogeny. A second limitation of this method is that it only uses known markers which were ascertained in modern populations to determine membership to Y-chromosome lineages, and, therefore, unknown variants are not being used to place low-coverage samples onto the tree. Furthermore, this method depends on haplogroup nomenclature, which may change as more SNPs get discovered and as the nomenclature system is updated. Lastly, by adding branches to the tree on the basis of haplogroup name and not by estimating genetic distance results in loss of branch length information. With this in mind, we urge caution interpreting phylogenetic affinities estimated with low-coverage aDNA samples, due to known problems such as deamination and incompleteness of the data.

#### S2.14.1.6 Results

##### S2.14.1.6.1 Steppe – Botai and Yamnaya

We identified 2 distinct Y-chromosome lineages in the two Botai\_CA male samples: BOT14 was determined to carry a derived allele at M478-R1b1a1 and BOT15 belonged to the basal haplogroup N. In the phylogenetic tree (Fig. 5), the R1b1a1 sample BOT14 is paired with a single individual from the Teleut population of southwestern Siberia/Altai. The marker M478 belongs to the same branch as M73 and both define the R1b1a1 lineage, which occurs almost exclusively in non-Europeans (34). This lineage reaches the highest frequencies in Central Asia and Siberia, in particular in populations surrounding the Altai region, such as the Kumandins (35%) (143), Bashkirs (23%), and Balkars (10%) (34).

The newly sequenced high-coverage Yamnaya sample carries the R1b1a2a2c1 lineage, which is closely related to R1b1a2a2 previously identified in other Yamnaya samples (2) and can be commonly found in present-day Eastern Europeans and in the Caucasus region. In the phylogenetic tree, this sample was placed more closely to one R1b1a2a2 Avar and 1 Okunevo individual. The Upper Paleolithic MA1, whose ancestry is present in both Yamnaya and Botai, carries derived alleles at markers defining the basal R haplogroup, and, therefore, it is placed at the root of all R clades. The geographical distribution of R clades found in our dataset can be seen in Fig. S25.

##### S2.14.1.6.2 Baikal Early Neolithic

In the Baikal\_EN males, N subclades occur in all samples, except for DA250, which belongs to NO1. However, more data may reveal membership to a more downstream clade of the Y-chromosome tree. We have determined Ust-Ishim to belong to a more ancestral lineage ancestral NO lineage, in agreement with recent re-examinations of this sample's Y-chromosomal affinities (115, 136, 144). Also in (136) the authors have pointed out that the Romanian Oase 1 sample (145) also shares this lineage,

which was probably widespread across Eurasia. The presence of subclades of haplogroup O in East Asia and N across Northern Eurasia is consistent with this hypothesis.

Of the remaining samples, individual DA247 belongs to the N lineage and DA251 to N1 but with no possibility of determining N1c2 due to the lack of reads covering the defining markers of this lineage. In our phylogenetic tree, DA245, DA248, and DA362 form a clade with 1 Komi individual and 1 Khanty individual, which all belong to N1c2 (Fig. S26). We note that we have excluded marker L665 that determines N1c2b2, given it presented clear inconsistencies with the haplogroup affiliation of some of the samples, with some presenting the derived allele at L665, but the ancestral allele for many markers upstream of this marker. Sample DA357 presented derived alleles at markers defining C2b (1 ancestral, 3 derived), C2b1 (2 derived), and C2b1a1 (1 derived), which points to a likely assignment to C2b1a1. However, it is worth noting an ancestral allele at C and a derived allele at N1c2, which bring uncertainty to haplogroup determination. Nonetheless, an N1c2 affiliation is unlikely because of an ancestral marker at N1 and considerable support for this sample to belong to C2b1a1.

#### S2.14.1.6.3 Late Neolithic/Bronze Age Baikal and Okunevo

After the Early Neolithic, the archaeological record of the region surrounding the Baikal Lake is characterized by the absence of burial sites that only reappear 1,500 years later during the Late Neolithic (88). After that, the Bronze Age cultures emerge in the area. It was therefore interesting to determine whether there were genetic shifts accompanying these cultural transitions. Additionally, PCR-based studies of these remains had already strongly suggested the presence of discontinuity between the EN and LN/BA at the level of Y-chromosomes (89).

As observed in Fig. 5, the transition observed between the Early Neolithic and Early Bronze was characterized by complete Y-chromosomal lineage turnover, with the former group carrying almost exclusively N lineages and the later presenting instead Q lineages. Interestingly, in the Okunevo culture from the Altai region, prevalence of Q lineages was also observed. It is worth noting that the lineages identified in 2 UstidaLN samples belong to both N and Q haplogroups: individual DA345 was classified as belonging to N1c1(xN1c1a), which has been reported to reach high frequencies (~80%) in the Yakuts (146). This sample was included in the same clade as other Siberian groups, such as Buryats, Yakuts, and Bashkirs. However, due to missing data, it was not possible to discern if this sample is ancestral to all these individuals or instead can be grouped with a particular branch of the tree. The other UstidaLN DA355 carried a derived allele at M346, which defines Q1a2.

1 Okunevo sample and 1 Kurma sample were assigned to Q1a, but additional resolution was not possible given the sparsity of the data. One Okunevo sample (RISE683) belongs to Q1a1b1 (xQ1a1b1a), also identified in 1 Karasuk individual (1) and is extremely rare in present-day populations. In our modern dataset, 1 sample from Uzbekistan carrying Q1a1b1a is the closest match to Q1a1b1. We note that these lineages are distinct than the one presented by Saqqaq Q1a1a-F746, which is prevalent in Inuviat from the Canadian Western Territories (143).

The Okunevo individual RISE670 belongs to Q1a2b-L940 (xQ1a2b1, Q1a2b2), which has a mostly Central Asian distribution. In our modern dataset, 1 Dungan is the closest match.

2 Okunevo and 1 UstidaLN and UstidaBA individuals belong to Q1a2-M346. In (147) this lineage appeared only in 2 individuals, one from the South Asian Brahmin population and the other from European Croats. In our modern dataset, Q1a2 has been identified in a Tajik individual. However, given the incompleteness of allele state at informative positions, it is not possible to determine whether the majority of ancient samples indeed belong to Q1a2(xQ1a2a, Q1a2b), as the Tajik sample, or a further downstream marker defining Q1a2a or Q1a2b, and therefore they were placed at the root of all Q1a2 branches: DA355 Q1a2(xQ1a2b2, Q1a2a1b, Q1a2a1c); DA361 Q1a2



(xQ1a2b,Q1a2a1b,Q1a2a1a1,Q1a2a1a2); RISE672 Q1a2(xQ1a2a,Q1a2b1,Q1a2b2); and RISE674 Q1a2(xQ1a2a,Q1a2c,Q1a2b1,Q1a2b2).

In ancient groups, lineage Q1a2a-L53 was identified solely in the Baikal Early Bronze Age samples from Shamanka and Ust’Ida, which closely match one individual from Turkmenistan. Only individual DA336, which presents Q1a2a(xQ1a2a1), could be excluded from the downstream Q1a2a1 branch, with the others not having enough data to clarify their membership status. Despite this, the data obtained for a subset of Shamanka\_EBA samples provided substantial evidence that these did not belong to either a Clovis-related branch Q1a2a1b defined by M971 or to Kennewick’s M930-Q1a2a1a branch, specifically DA335 Q1a2a (xQ1a2a1a,Q1a2a1b2), DA337 Q1a2a (xQ1a2a1a,Q1a2a1c); DA338 Q1a2a (xQ1a2a1a,Q1a2a1b2); DA353 Q1a2a (xQ1a2a1a,Q1a2a1b,Q1a2a1c1); and DA356 Q1a2a (xQ1a2a1b,Q1a2a1a1d,Q1a2a1a1e).

1 Okunevo sample and 1 UstIda\_EBA belong to Q1a2a1, and where data is available, these samples carry ancestral alleles at markers defining American lineages: DA343 Q1a2a1 (xQ1a2a1a,Q1a2a1b); RISE662 Q1a2a1 (xQ1a2a1b,Q1a2a1a1,Q1a2a1a2).

1 ShamankaBA (DA339) and 3 Okunevo (RISE664, RISE718, RISE719) belong to Q1a2a1c-L330 (xQ1a2a1c1), lineage also present in the Yeniseian-speaking Kets in our dataset. These lineages are also distinct from the ones identified in Clovis (Q1a2a1b-M971) and Kennewick (Q1a2a1a-M930). Geographical patterns illustrate well the regional differences in terms of Q lineages in our modern and ancient samples (Fig. S27): the Q lineages identified in our samples have a Central Asian/Siberian distribution, while the lineages identified in the Paleoamericans Clovis and Kennewick occur mostly in Native American populations.

Interestingly, 1 Okunevo individual (RISE675), presented the R1b1a2 lineage. However, by directly inspecting the BAM file we realized that by applying variant quality filters, these removed the derived allele A at the Z2105 marker (C->A), which defines the R1b1a2a2. This allele is indeed present in RISE675 although only covered by one read, supporting the notion of admixture with Yamnaya-related peoples (largely assigned to R1b1a2a2). In addition to this, the R1b1a1 lineage identified in Botai does not support a direct link between Botai and this Okunevo individual, though we urge caution interpreting these results given the small sample size of Botai males sampled in the present work (n = 2).

#### S2.14.1.6.4 Turkmenistan and Anatolia

The Namazga samples from Turkmenistan belong to J-M304 (DA379) and to J2a1-L26 (DA381). The later Iron Age sample Turkmenistan\_IA from the same region belongs to the F992/Z93-R1a1a1b2 lineage, which has also been identified in Srubnaya Late Bronze Age Steppe (LBA) populations (47). In our dataset, this lineage and their subclades have been identified in 4 Altaians, 2 Kyrgyz, 2 Bashkirs, 2 Tajiks, 1 Teleut, and 1 Uyghur individual. In a larger survey of R1a derived males, it was determined that the vast majority of Z93 lineages occur in Central and South Asian groups, while the sister branch Z282 is mostly restricted to Central and Eastern Europe (148). The fact that the Turkmenistan\_IA sample shares the Z93 lineage with Srubnaya is in agreement with the increased affinity of the Turkmenistan sample to LBA steppe populations.

All Anatolian Early and Middle Bronze Age individuals belong to J2a derived lineages with the exception of the Anatolian MLBA sample MA2208, which instead carries the G2a2b1 lineages, closely related to those present in Anatolian and European Neolithic samples (47, 149). Regarding the J2 lineages identified, transmission through contact with populations related to Caucasus hunter-gatherers or Iranian Neolithic groups is a possible explanation, given they have been shown to carry J/J2 clades (7, 42) (150).



## S2.14.2 Mitochondrial DNA analysis

### S2.14.2.1 Ancient sample mtDNA lineage determination

To investigate mitochondrial DNA lineages in our ancient and present-day dataset, we selected reads aligned to the mtDNA with samtools and uploaded the resulting individual bam files to the mtDNA server (151). We submitted the resulting hsd output file to haplogrep V2, which we used for haplogroup identification, and downloaded the resulting aligned mtDNA sequences in fasta format. The maximum likelihood phylogeny shown on Fig. 5 was generated with RAXML (152), GTRCAT model, and 100 bootstraps, selecting the best tree. In order to minimize uncertainty, we removed 3 samples whose position in the phylogeny did not match the haplogroup identified: Kurma DA354 (D4, haplogrep score 0.61), Anatolia\_IA MA2197 (U8b1b2, 0.57), and Namazga\_CA DA380 (U2b, 0.69).

### S2.14.2.2 Results

We identified a diverse set of mtDNA lineages in our ancient samples belonging to the main clades A, C, D, F, G, H, J, K, R, T, U, W, and Z (Table S15).

Regarding lineage A, 7 Okunevo individuals were included in the A8a (n = 4) and A8a1 (n = 3) clades. A8 mitochondrial lineages are widespread in Far Eastern and Northern Siberian populations, such as the Dolgans, Itelmens, Evens, Koryaks, and Yakuts (153), and in our present-day data it has been detected in 1 Koryak individual. Additional distinct subclades of A were identified in 1 Lokomotiv (A), 2 UstIda\_LN (A, A2), and 2 additional Okunevo (A) samples. Of these, the A2 lineage present in one UstIda\_LN sample is of particular interest, given its subclades occur especially in Chukchis, Eskimos, and Na-Dene-speaking peoples (153). In the present-day dataset we analyze here, it has been found in individuals of the Yukpa, Tsimshian, Athabaskan, and Mayan populations.

The C5c lineage was identified in 4 Okunevo individuals. Interestingly, this lineage has been suggested to be restricted to Altai populations, which would suggest some extent of temporal mtDNA continuity in the region where Okunevo samples were excavated (143). We identified the C4a2a1 in 3 ShamankaBA, 1 Kazakh individual as well as closely matching 1 Yakut (C4a2a1a) and 1 Evenk individual (C4a2a1b). 2 UstIdaBA and 1 ShamankaBA carry the mitochondrial lineage C4a1a3, which was also identified in 1 ancient individual from Ust'-Belaya, dated between 4410–4100 BCE (154). CentralSteppe\_EMBA samples both present subclades of the C4 lineage, with one of the samples carrying C4 and the other C4a1a4a. Regarding modern samples, our results are concordant with other observations that have shown that while C4a1 lineages are more widespread across Siberia, C4a2 are more restricted to Evenks and Yakuts (155).

The Copper Age Botai sample BOT2016 is placed as the root of the Z clade, and it presents haplogroup Z1a. In our modern dataset, haplogroup Z1a was found in an Altay-speaking Teleut individual and it has been reported to be broadly distributed across East/Central Siberia (156). Notably, the presence of the Z1a lineage in Saami, Finns, and Volga peoples has been linked to movements from Siberia into Northern Europe occurring between 3,000–2,000 years ago (157).

Clade D appears to have persisted in the Baikal region from the Neolithic to the Early Bronze Age, with occurrences of lineage D4 lineages across this period of time. Of these, lineage D4e1 occurs exclusively in 2 ShamankaEN. The mitochondrial lineage D4j, however, was identified in both Baikal Neolithic and Bronze Age individuals and typically presents a South Siberian distribution (158). Additionally, D4j was also found in 1 Ottoman individual, which may be the result of contact with Central Asia during this period, as also supported by autosomal ancestry observations for this sample. In our modern dataset, multiple subclades of D4 were identified in Dai, Buryat, Teleut, and Khanty

individuals. We note that the North American Clovis sample carries the D4h3a7 haplotype and that a Devil's Gate Neolithic sample belongs to the D4 haplogroup (25).

In the ancient samples of the present study, clade G is represented by 3 ShamankaEN and 1 ShamankaBA individuals that belonged to G2a1, a subclade of G2a that is mostly restricted to Central Asian populations (159). Interestingly, we note one Scythian individual presented a closely related haplogroup, G2a4 (47). G2a is frequent in Turkic- and Mongolic-speaking populations in Asia (158), which is in agreement with the higher amount of East-Asian-related ancestry identified in the Baikal Neolithic group. In the present-day dataset, it is more closely related to 1 Buryat and 1 Dungan, which present subclades of G2a and G2b, respectively.

Regarding clade H, 3 Okunevo individuals belong to H6a1b and one to H6a. The closely related H6b was also identified in one Tajik individual. H6 lineages can be commonly found in Central Asian populations (158).

Lineage F1b and sublineages were identified in 3 Baikal\_EBA and 1 Baikal\_EN, and in 1 individual each of the present-day Kalmyk, Turkmenistan, and Kyrgyzstan populations. F1b lineages have been reported in two 15-19th century Yakut individuals (160).

One other Botai sample (BOT15) presents the R1b1 lineage, which is also shared by an UstIda LN sample. Curiously this lineage has also been identified in a WHG (139). Yamnaya belongs to haplogroup R1a1a, and, interestingly, it has been found in peoples of the Caucasus and Eastern Europe, which is in agreement with the CHG and EHG composition of this archaeological group.

Regarding haplogroup K, it was identified in a Botai Copper Age sample (BOT14) that carried the mitochondrial lineage K1b2, with closest match in 1 Kazakh individual (K1b2a2). 2 samples from Anatolia also belonged to K, of which 1 Anatolia\_MLBA sample presented the K1a haplogroup, present in both Europe and the Near East, and 1 Anatolia\_Ottoman to haplogroup K.

Regarding clade U, it was identified in MA1(26), Sidelkino EHG (U5a2), and 1 Anatolia\_MLBA (U1a).

The majority of Anatolian Bronze Age samples belong to J derived lineages (J2b1, J1c10a, J1c), and 1 Namazga sample from Turkmenistan carried J1. J2b is typically found in Atlantic and Mediterranean Europe, and J1c is widespread in Europe and commonly found in Neolithic remains (161). Lastly, Turkmenistan\_IA DA382 was assigned to T2c1a, with a hypothesized Middle Eastern origin (161).

## S2.15 Rare variant sharing between modern populations and the Botai and Yamnaya samples

Arjun Biddanda, Rui Martiniano & John Novembre

To further understand the distinct histories of Yamnaya- and Botai-associated ancestry in Eurasia, we carried out an analysis of rare-variant sharing. This analysis leverages the availability of whole-genome sequences for each sample and the whole-genome reference panels provided by the 1000 Genomes (1000G Project Consortium, 215) and Simons Genome Diversity Projects (162). Rare variants are typically the result of recent mutations that have taken place since the out-of-Africa dispersal and are geographically distributed in patterns that reflect the dispersal of descendants from the original carrier of the mutation (163). As such, they can provide useful markers of dispersal and recent ancestry (164).

### S2.15.1 Relative abundance of rare variant sharing with European and East Asian populations at a regional scale

We first merged the dataset consisting of ancient whole-genome sequences from the Botai, Yamnaya, and other samples across Eurasia with the individuals from the 1000 Genomes Project. We then removed all variants that were either C-to-T or G-to-A transitions to avoid confounding due to DNA damage (165). This merged dataset was used to assess rare variants shared between ancient genomes and modern populations. We determined rare variants to be variants that had a global minor allele frequency  $< 1\%$  in the 1000 Genomes Project Phase 3 dataset.

To explore broad-scale spatial patterns of rare variant sharing between ancient and modern genomes, we determined the number of rare variants that were shared between European populations (EUR) and East Asian populations (EAS) of the 1000 Genomes Project for each of several ancient sequenced genomes (Fig. S33). The Yamnaya consistently share a higher proportion of rare variants with European populations, whereas the Botai share a higher proportion of rare variants with East Asian populations (Fig. S33).

### S2.15.2 Contemporary geographical distribution of rare variants that are shared with Yamnaya and with Botai

As a more fine-grained assessment of rare-variant sharing, we next sought to reveal the geographic distributions of contemporary rare variants that are shared with Yamnaya and with Botai. We took an approach that first involves categorizing variants by their geographic distributions. For each variant we then created a vector of length 26 where each entry in this vector represents the frequency of the variant in each of the 26 populations from the 1000 Genomes project. We then assemble all variants into a matrix and applied hierarchical clustering with  $K = 20$  on the SNP-by-SNP distance matrix computed using the Canberra distance (166). For clustering we use the partitioning-around-medoids (PAM) with the cluster library for the R statistical software (167). The resulting categorical assignments and the frequency of variants that fall in each category allow for visualization of rare variant sharing patterns (Figure S34). We also compare the abundance of each category between Yamnaya- and Botai-shared variants, and we see that the Botai show a higher abundance of variants that are found exclusively in East Asian and American populations (Fig. S34).

### S2.15.3 Geographic maps of rare-variant sharing abundance

As a second, more fine-grained, approach to assess rare-variant sharing approaches, we merged the ancient whole genome sequences with the Simons Genome Diversity Project (SGDP) (162) data, due to their finer scale sampling across the globe. Here we used the same set of variants that were rare ( $MAF < 1\%$ ) in the 1000 Genomes and counted the number of these variants that were shared between individuals in the SGDP and each ancient genome. We then plotted maps of the number of rare variants that were shared (Fig. S35). From Fig. S35 we see that Botai have a higher number of rare variants shared with individuals at higher latitudes and among Siberian populations, whereas Yamnaya share much more with European and South Asian populations.

### S3: Radiocarbon dating

Karl-Göran Sjögren

4 human tooth and petrous bone samples from Kara-Depe, Geoksyur, and Takhirbai 3 were dated at the Chrono Centre, Queens University, Belfast. A further sample from Takhirbai 3 failed due to poor collagen preservation. Collagen extraction and other laboratory methods used at the Chrono Centre are described in detail in (168). Details of the datings are given in Table S3.  $^{14}\text{C}$  values were calibrated to 2 sigma intervals at the Belfast laboratory using the Calib software, rev 7.0.0, and the Intcal13 calibration curve.  $\delta^{13}\text{C}$  and  $\delta^{15}\text{N}$  were measured on all samples, as well as C/N ratio. C/N for all samples was between the accepted standard for good collagen quality, i.e. between 2.9 and 3.6.

The calibrated values in Table S3 do not take account of possible reservoir effects. The  $\delta^{13}\text{C}$  values of the samples are within the range for populations subsisting mainly on a terrestrial C3 diet, although slightly higher than usual. If C4 plants were also consumed, this would probably have been only in minor quantities. The  $\delta^{15}\text{N}$  values on the other hand, are higher than expected from such a diet. This may be due to several factors. First, the location of the sites in the vicinity of rivers suggests the possibility of a freshwater fish component in the diet, and the dates may in this case be affected by a freshwater reservoir effect (FRE). Second, elevated  $\delta^{15}\text{N}$  values may result from environmental factors such as dry climate and/or elevation. Third, since the analyzed samples consist of tooth and petrous bone samples, it is possible that the  $\delta^{15}\text{N}$  values are affected by a breastfeeding effect.

It is difficult to evaluate these possibilities on the basis of available data. Freshwater reservoir effects have not been studied in the region, and data from faunal remains at settlements are also not available. The extent of fish consumption is therefore unknown. The present climate of Turkmenistan is indeed arid, and much of the country is occupied by the Karakum desert. The locations of the studied sites at the foothills of the mountains in the south are characterized by slightly higher humidity than areas further north, but it is still arid. It is therefore quite possible that  $\delta^{15}\text{N}$  might be elevated due to climate. Regarding a possible lactation effect, the 2 sampled teeth were not determined, so we do not know which teeth were analyzed.

There is a possibility that the dates may be affected by an FRE of unknown size, although factors such as climate and lactation may well be sufficient to account for the high  $\delta^{15}\text{N}$  values. Also, the correspondence of the Kara-Depe dates with the commonly accepted datings for Namazga III suggests that the FRE may not be exceedingly large.

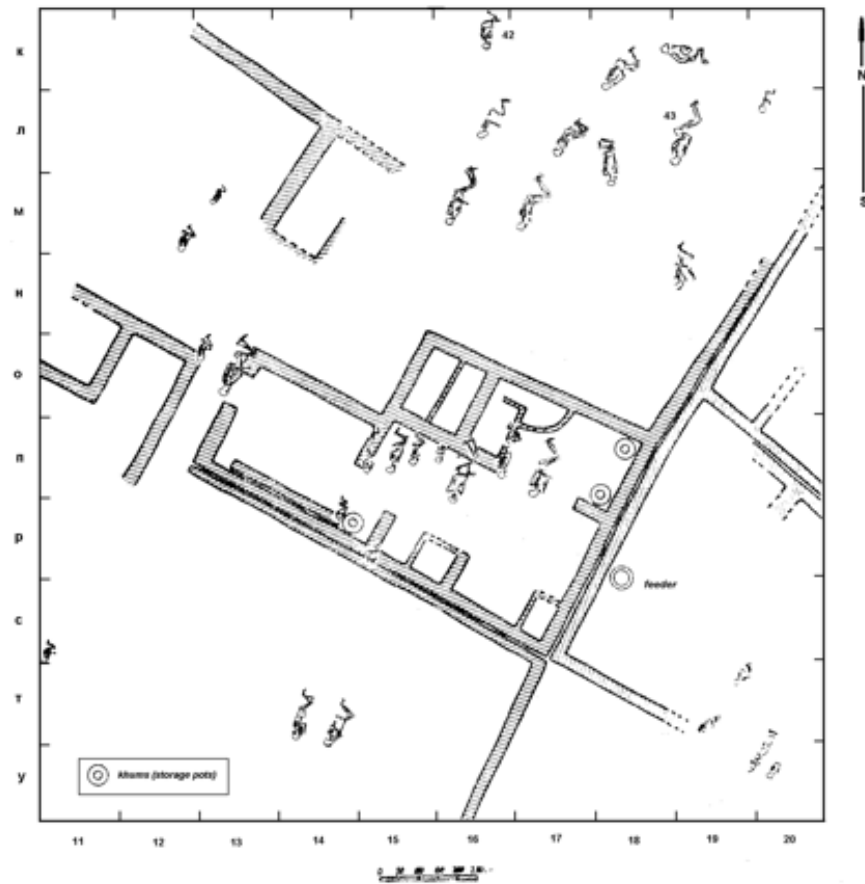

**Fig. S1.**

A plan of the excavation illustrates the burials of the skeletons (Namazga).

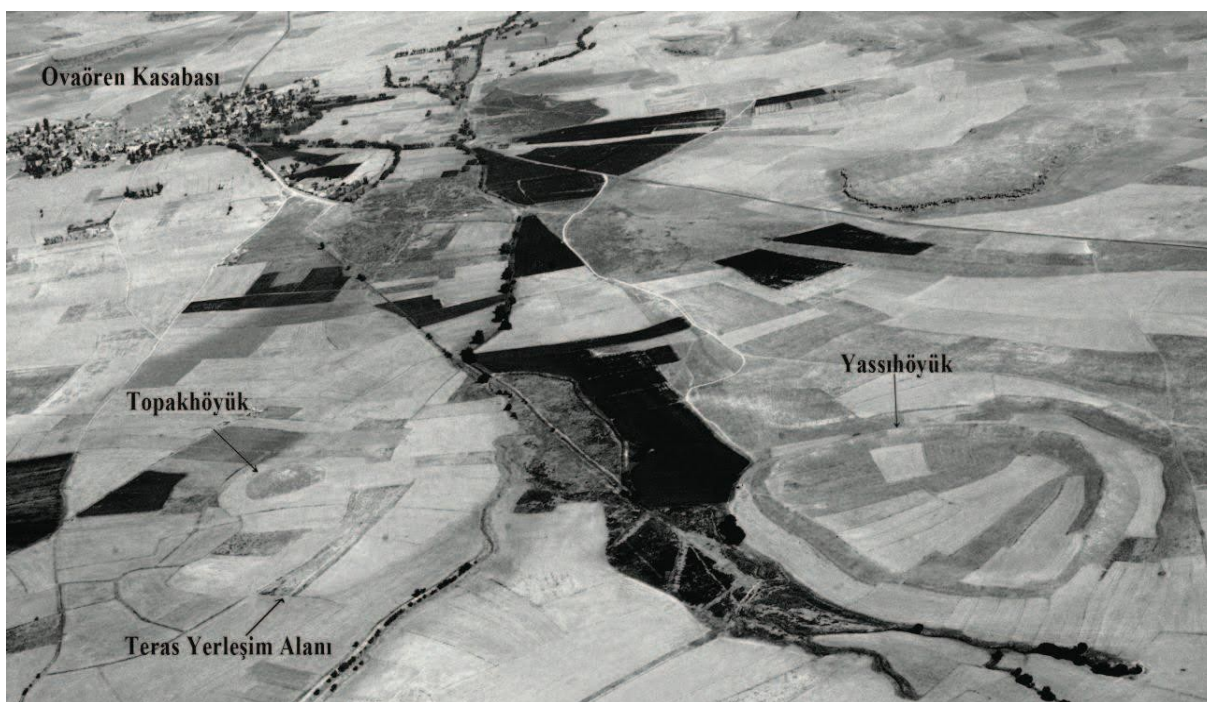

**Fig. S2.**

The three areas of Ovaören – Yassıhöyük, Topakhöyük, and the Terrace (Teras).



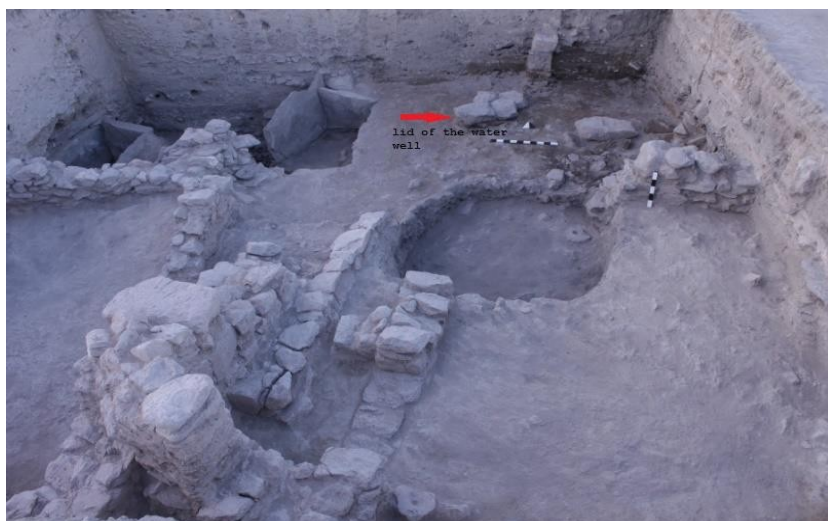

**Fig. S3.**  
Graves and the well of trench GT-137, layer V.

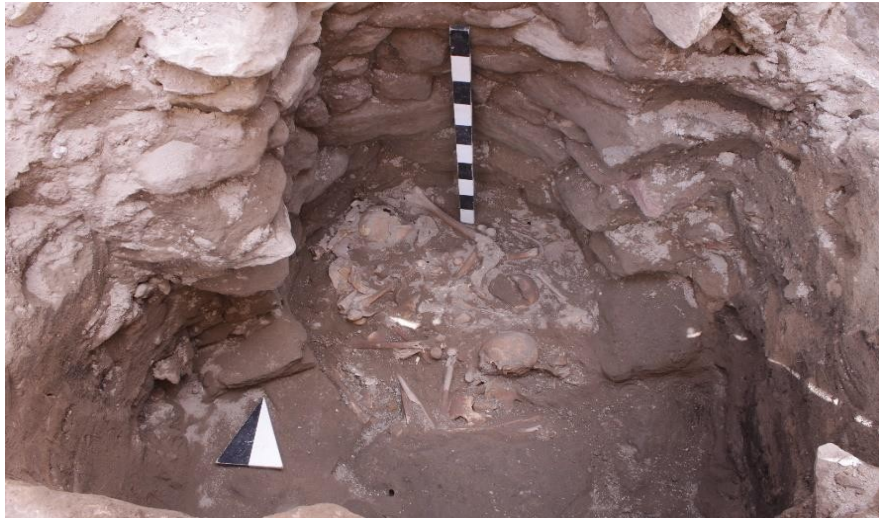

**Fig. S4.**  
Skeletons in the well of trench GT-137, layer V.

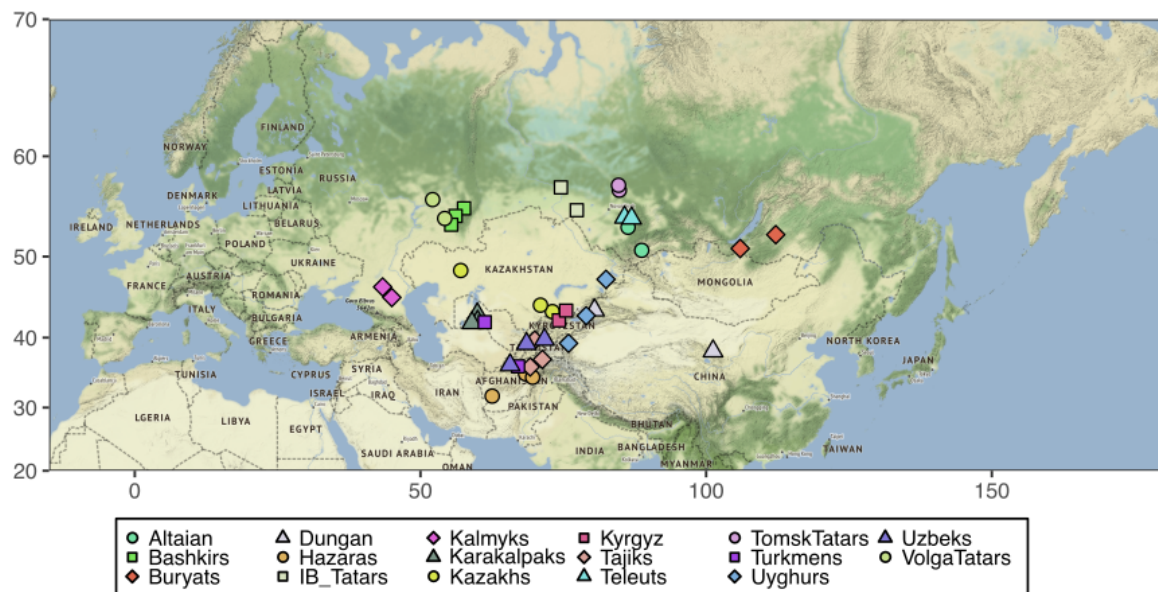

**Fig. S5.**  
Geographical location of 41 newly sequenced present-day high-coverage genomes.

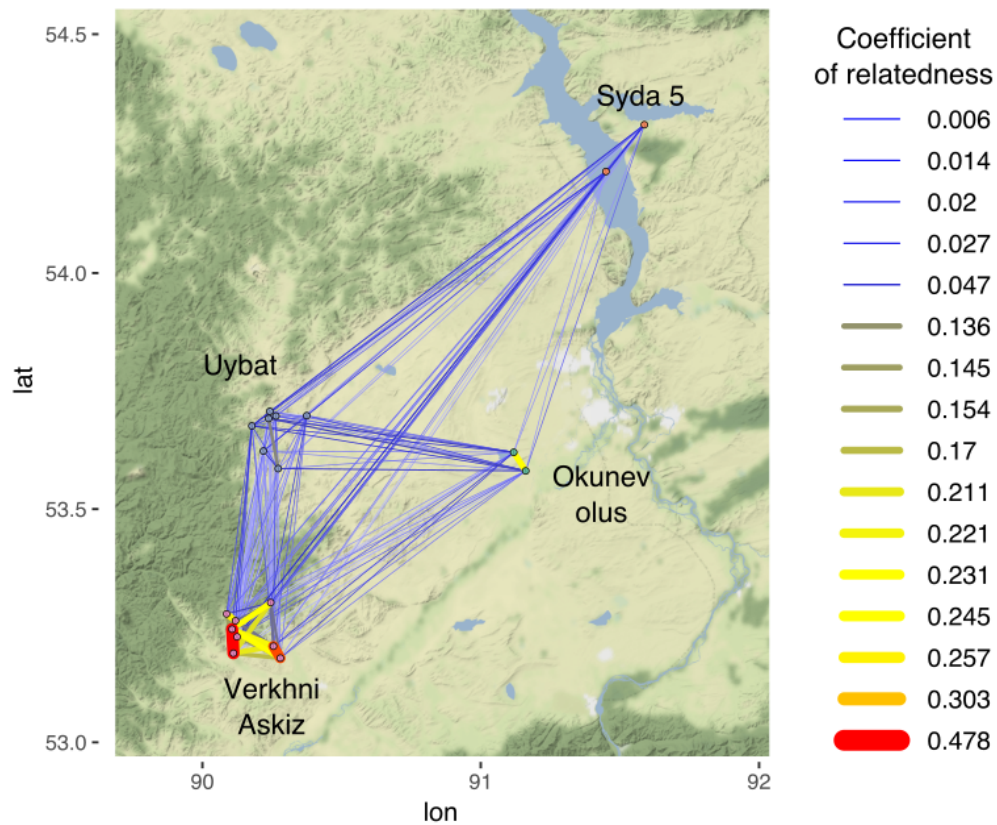

**Fig. S6.**

Geographic patterns of relatedness between different Okunevo\_EMBA groups from the Altai region (Verkhni Askiz, Okunev Ulus, Uybat and Syda 5) and between individuals within each group. Dots represent individuals, and the lines connecting them are colored according to the relatedness shared by those individuals. Coordinates were jittered slightly to avoid overlap between samples.

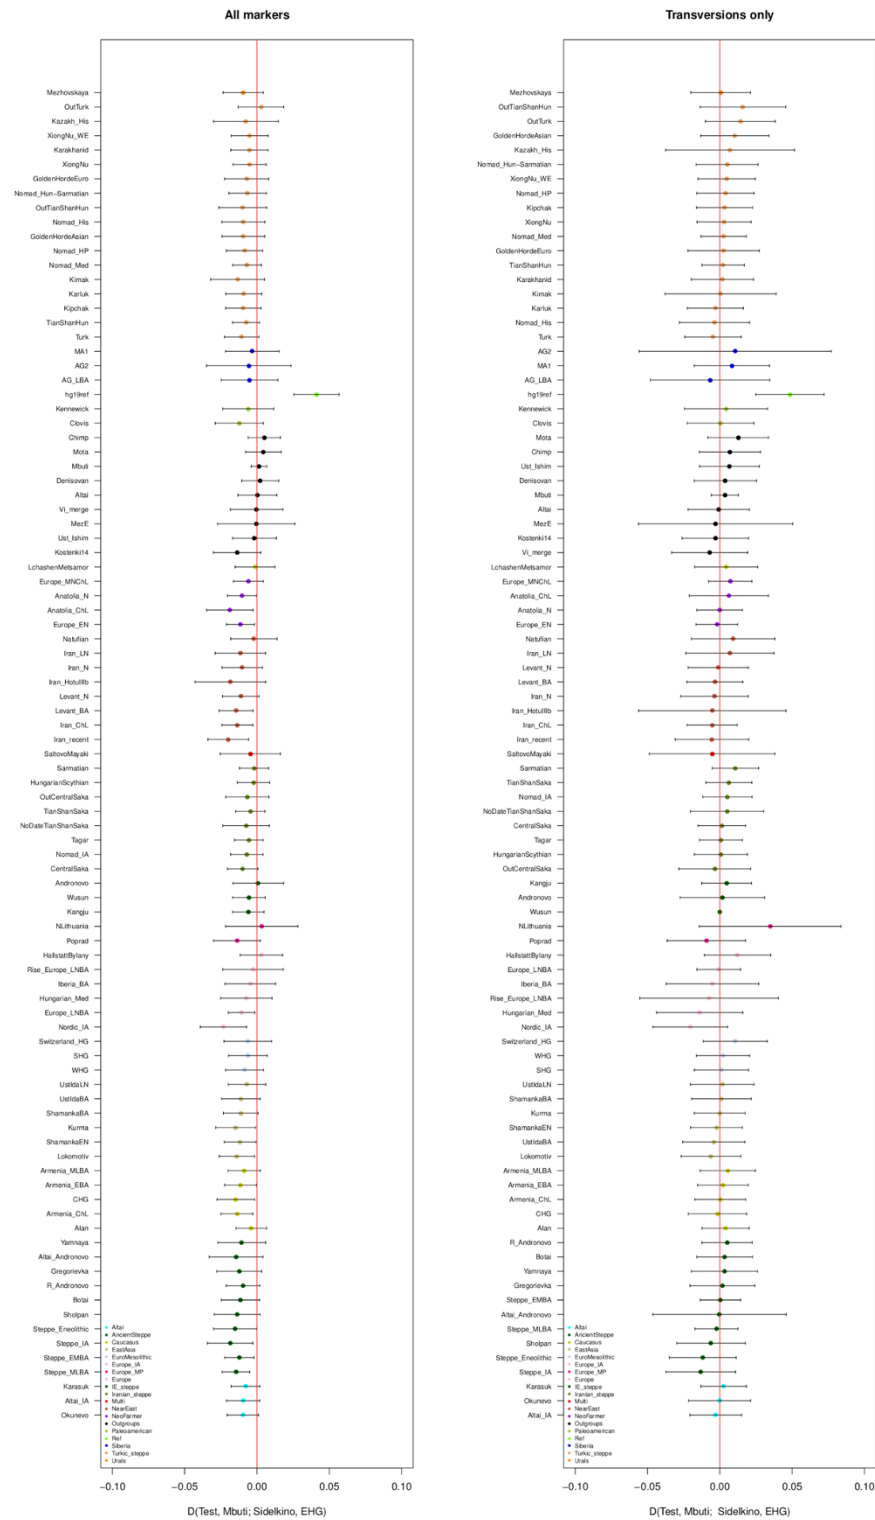

**Fig. S7.**  
D-statistics test of the form  $D(\text{Test}, \text{Mbuti}; \text{Sidelkino}, \text{EHG})$ .







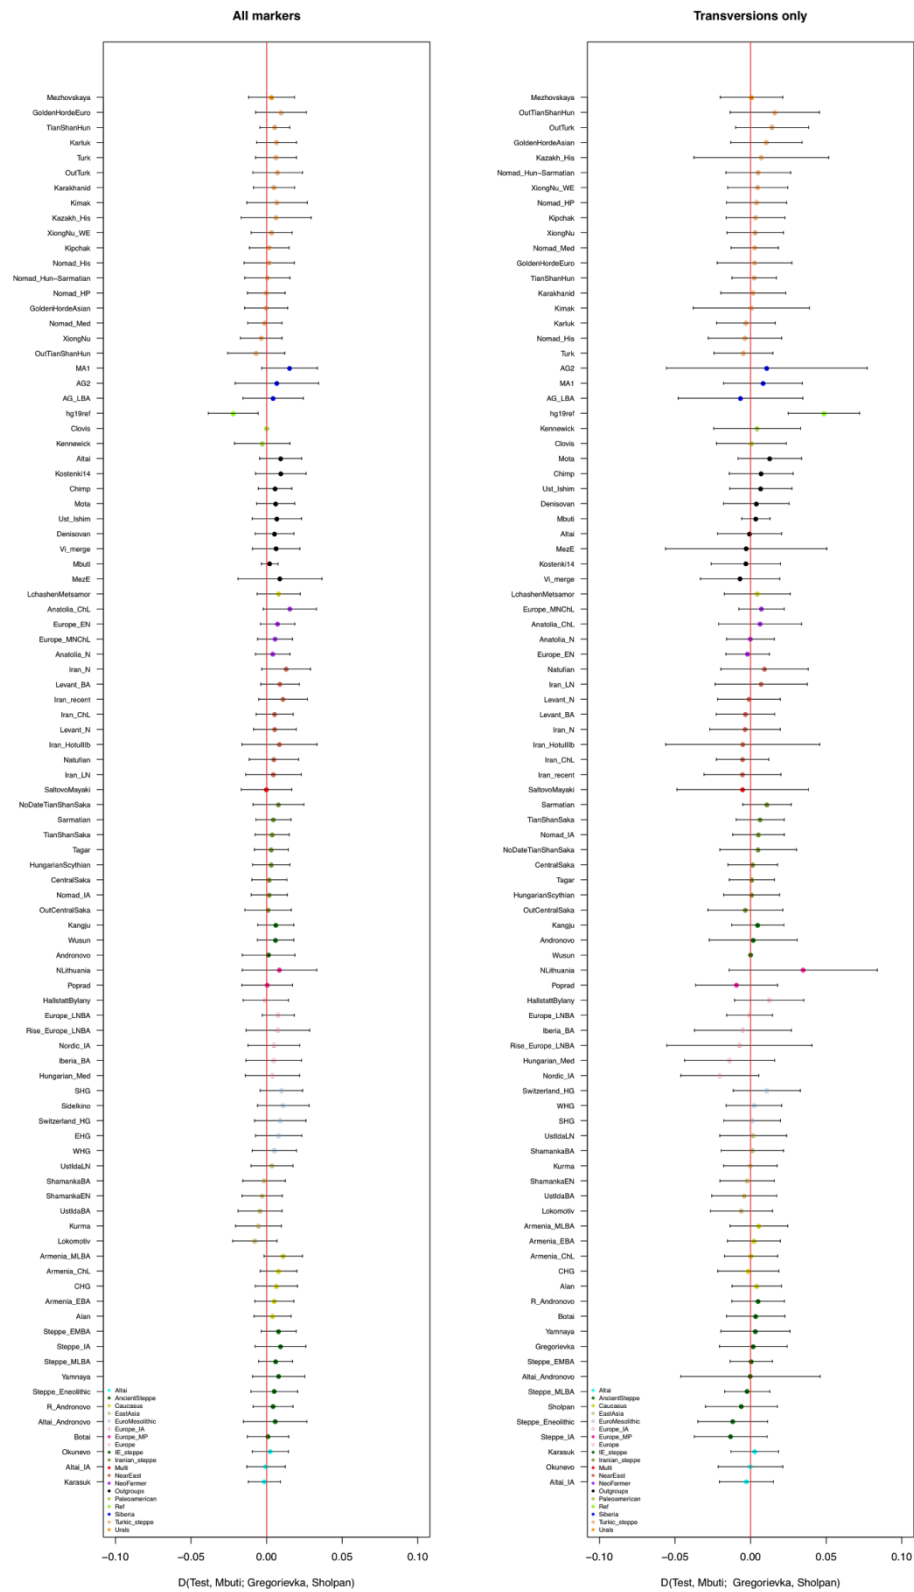

**Fig. S10.**  
D-statistics test of the form  $D(\text{Test, Mbuti}; \text{Sholpan, Gregorievka})$ .

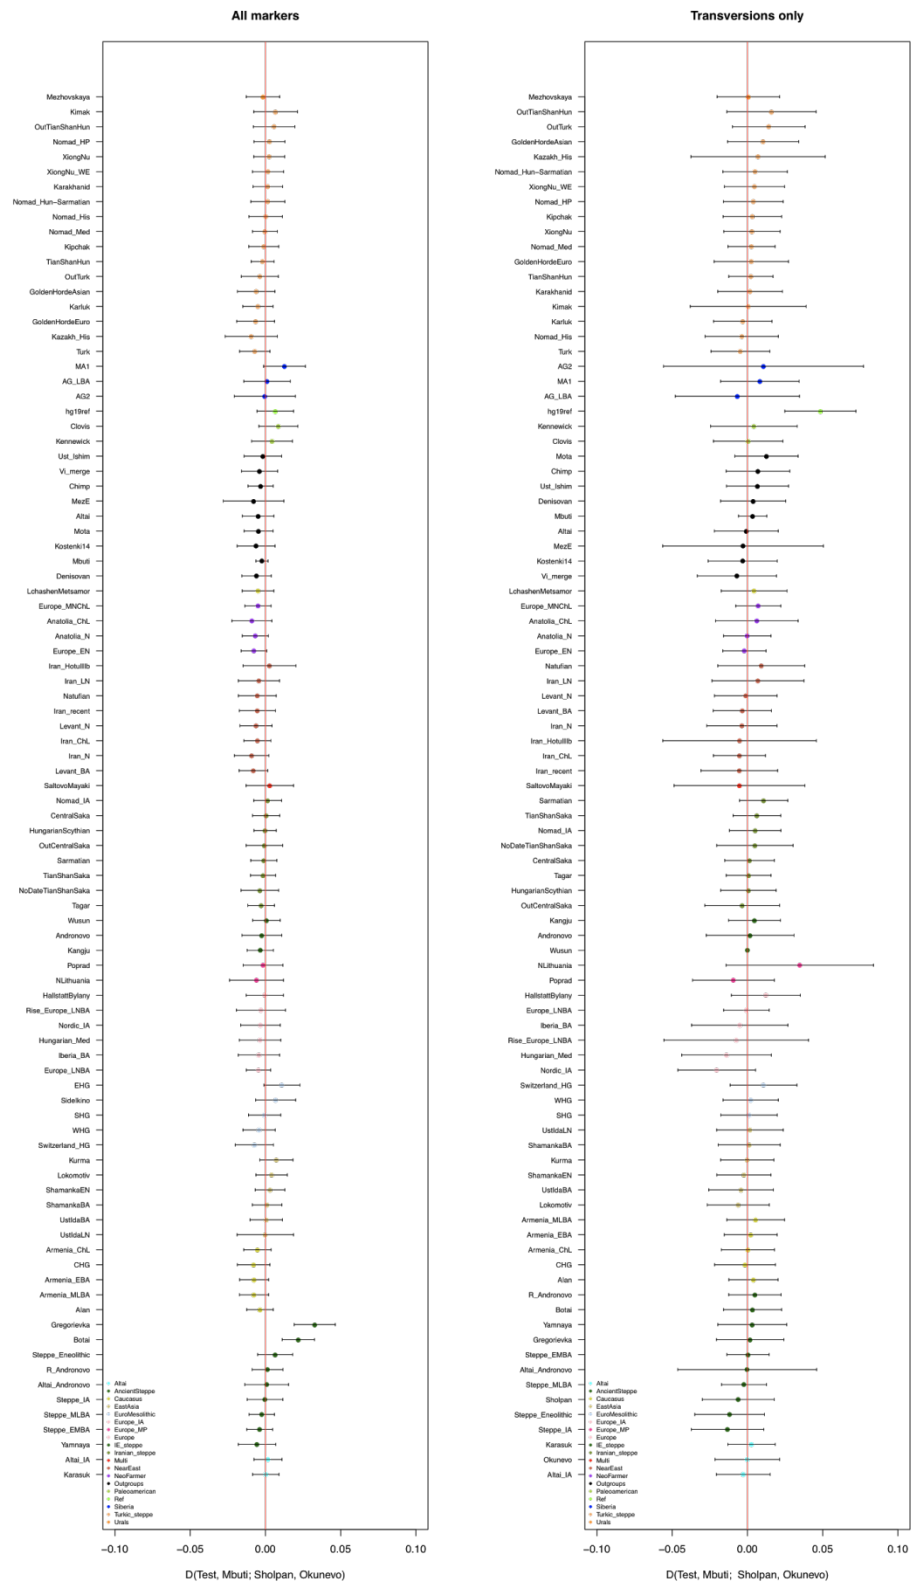

**Fig. S11.**  
D-statistics test of the form  $D(\text{Test}, \text{Mbut}; \text{Sholpan}, \text{Okunevo})$ .

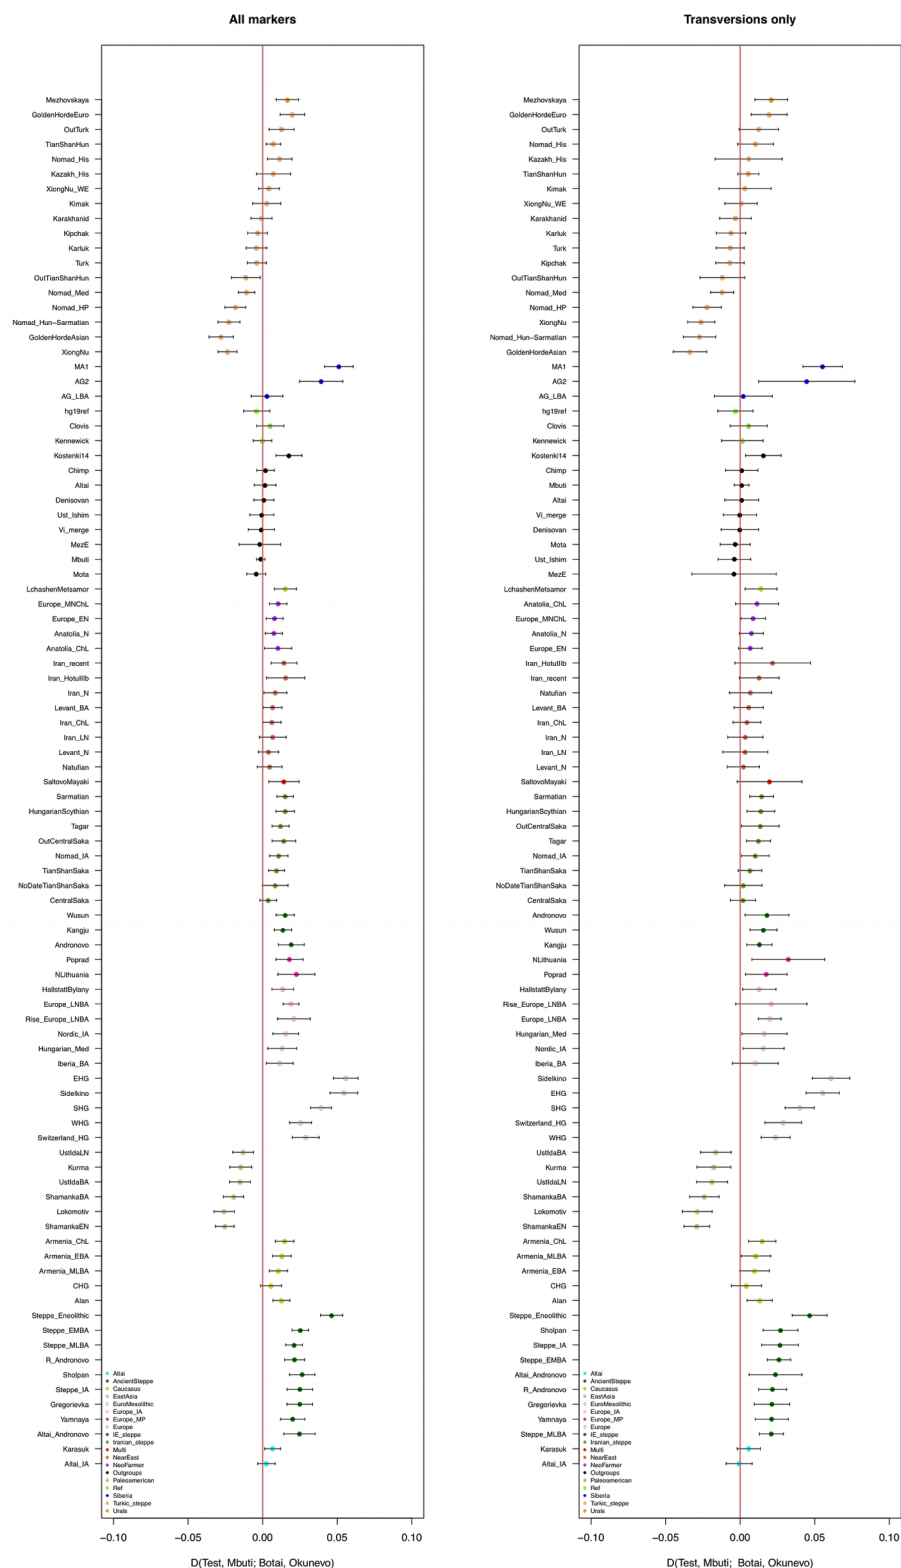

**Fig. S12.** D-statistics test of the form  $D(\text{Test}, \text{Mbuti}; \text{Botai}, \text{Okunevo})$ .

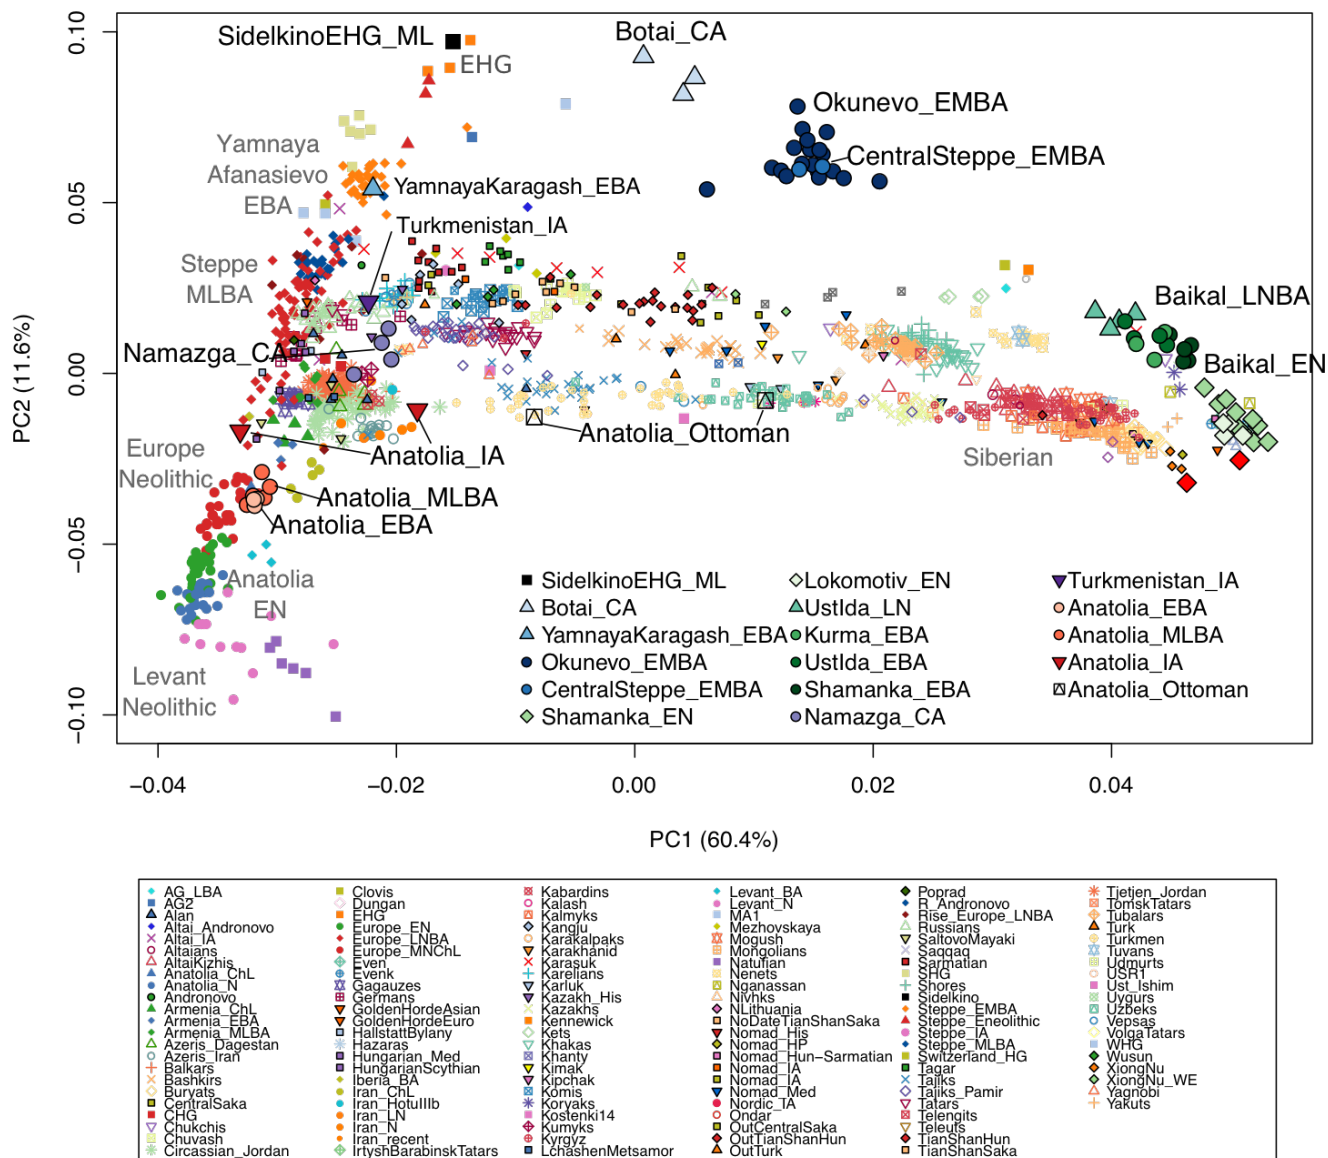

**Fig. S13.**

Principal Component Analysis estimated with ancient and modern Eurasians.

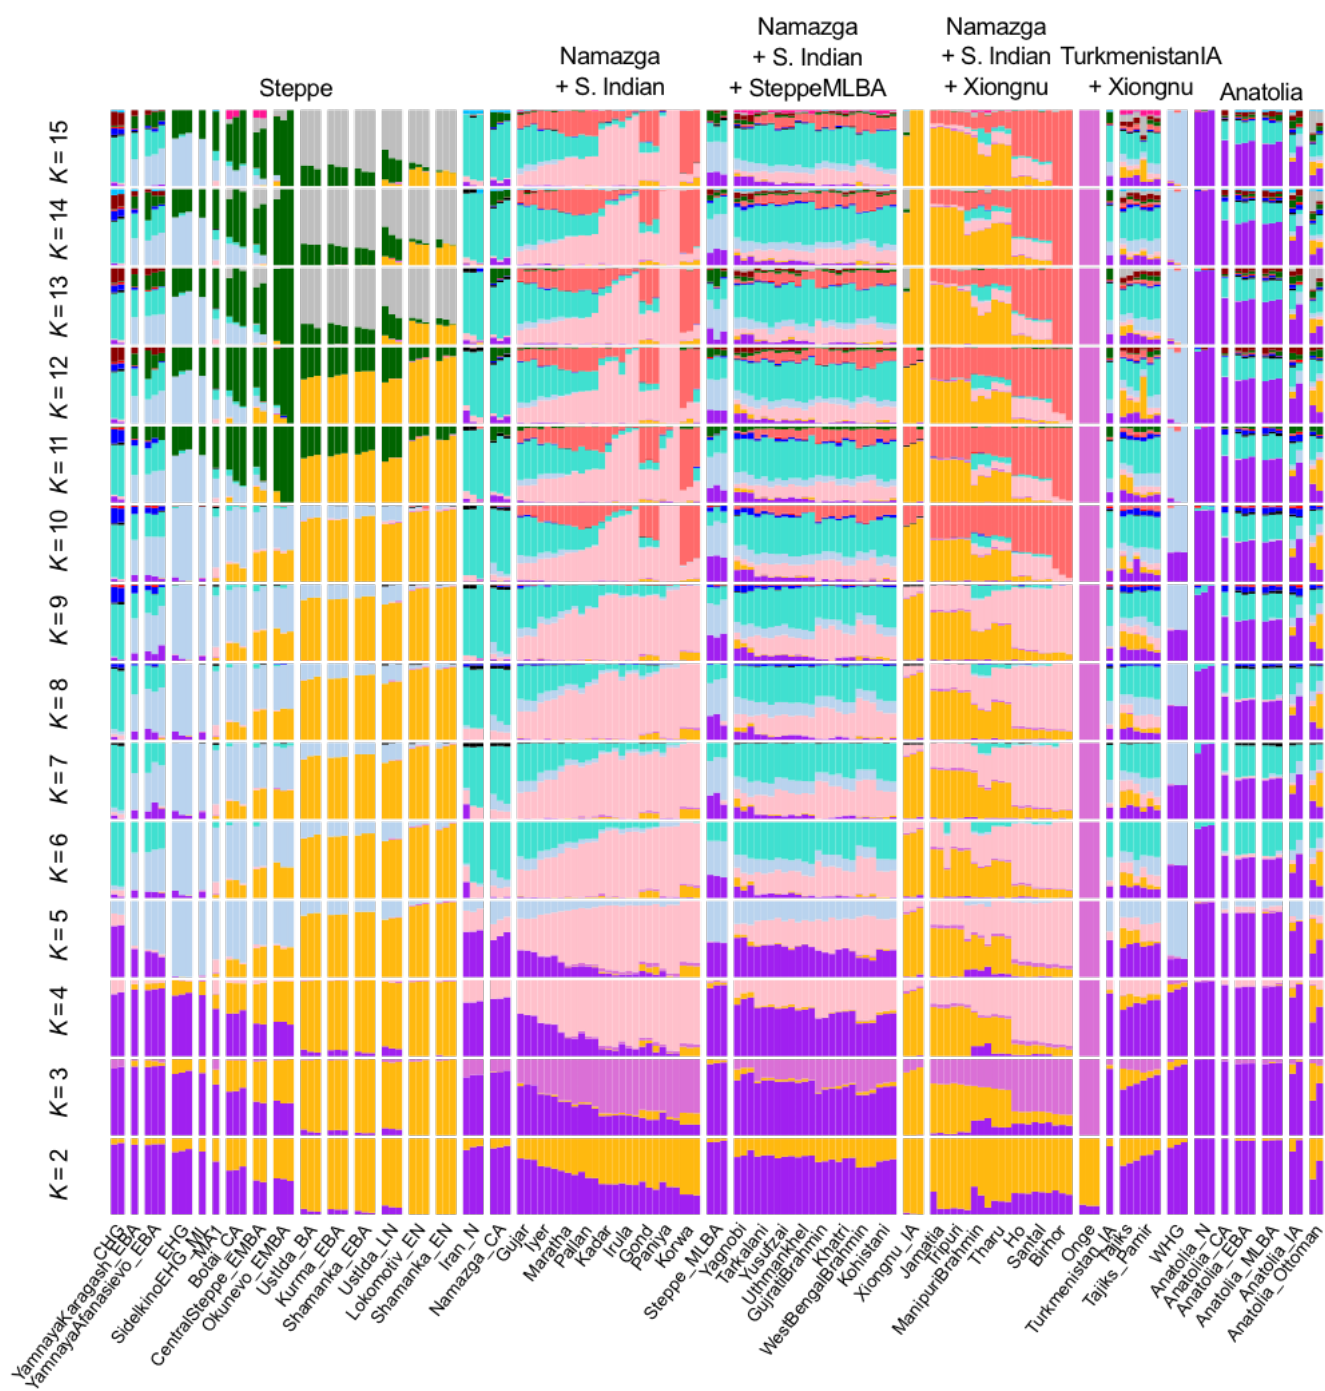

**Fig. S14.**

ADMIXTURE analysis for K = 2–15.



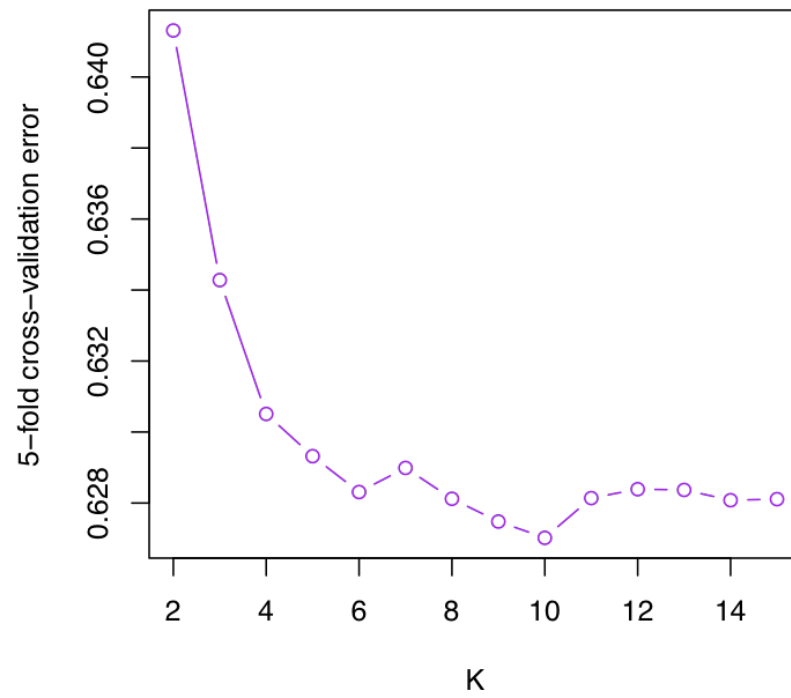

**Fig. S15.**  
Cross-validation errors for the ADMIXTURE analysis.

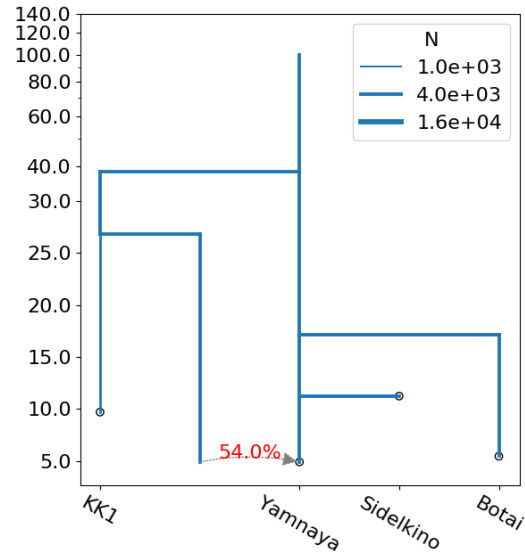

**Fig. S16.**

A simple 4-leaf demography centred around Yamnaya. Yamnaya was modeled as a mixture of CHG- and ANE-related ancestry, with 54% of its ancestry inferred to come from CHG. The Yamnaya ANE ancestry is inferred to be closer to Sidelkino (diverging 11 kya) than to Botai (diverging 17 kya). The Yamnaya CHG ancestry is inferred to be distantly related to KK1, diverging 27 kya, though we note the larger models in Figs. S19 and S20 inferred a more recent divergence time.

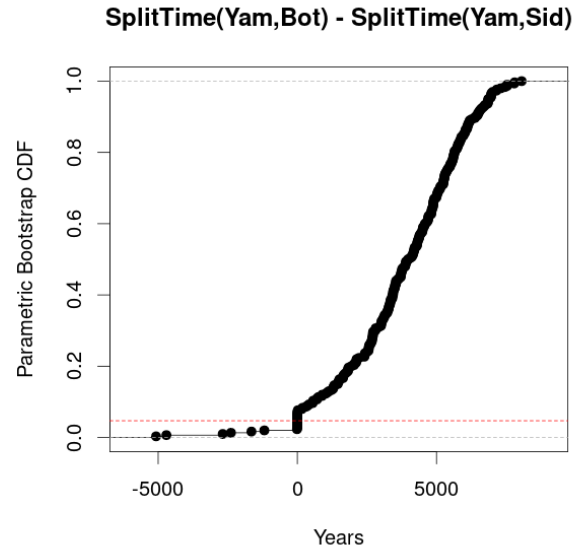

**Fig. S17.**

Parametric bootstrap distribution of  $T_{\text{Botai-YamANE}} - T_{\text{Sid-YamANE}}$ . The hypothesis  $\{T_{\text{Botai-YamANE}} < T_{\text{Sid-YamANE}}\}$  can be rejected with  $p = .047$  (shown in the red line).

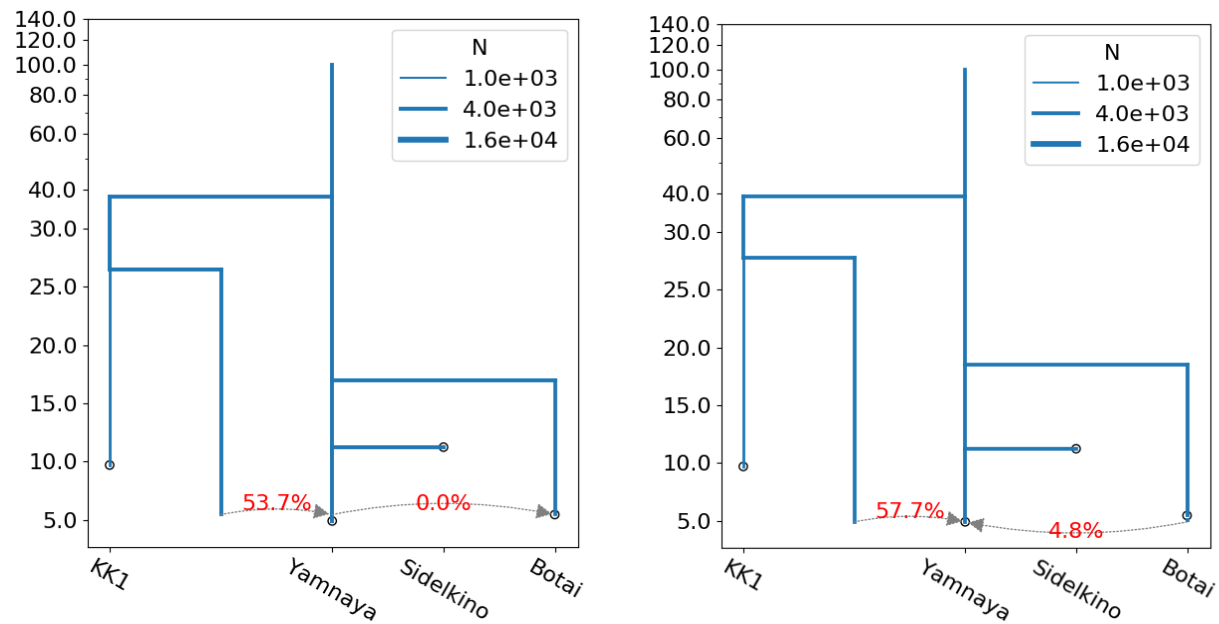

**Fig. S18.**

Adding additional gene flow events to the model in Fig. S16, we inferred no gene flow from Yamnaya to Botai, and a pulse of 4.8% from Botai to Yamnaya, which was not significantly different from 0 (p-value .18) under 300 parametric bootstraps simulated under the null model with no admixture (Fig. S17).

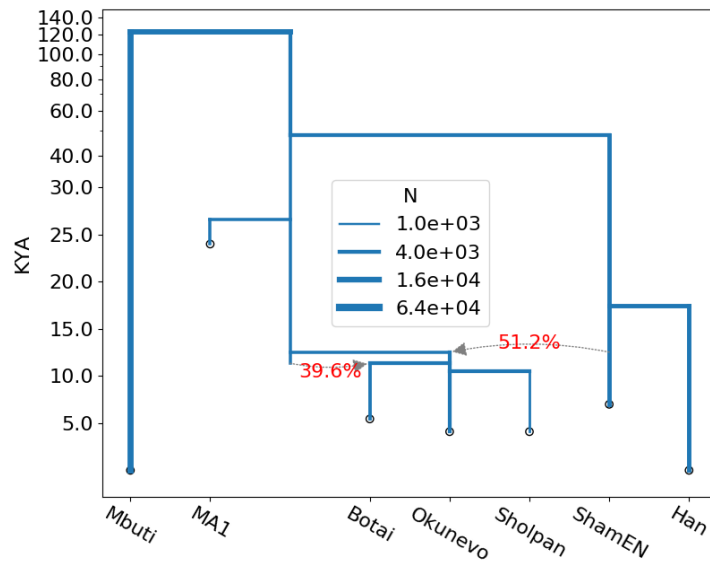

**Fig. S19.**

An inferred demographic model with 7 leafs, including 3 ancient steppe populations (Botai, Okunevo, and Sholpan) and 1 Baikal population (ShamankaEN). The steppe populations are modeled as a mixture of ANE ancestry (related to MA1) and East Asian ancestry (related to ShamankaEN). Botai has less East Asian ancestry than Okunevo and Sholpan, which we modeled by an additional ANE pulse into Botai from a ghost ANE population.

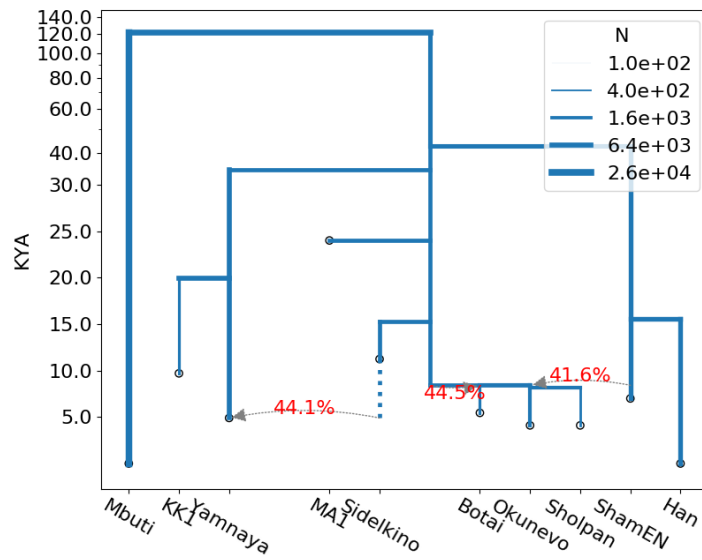

**Fig. S20.**

A 10-leaf model based on combining the models in Fig. S16 and Fig. S19 and re-estimating the model parameters.



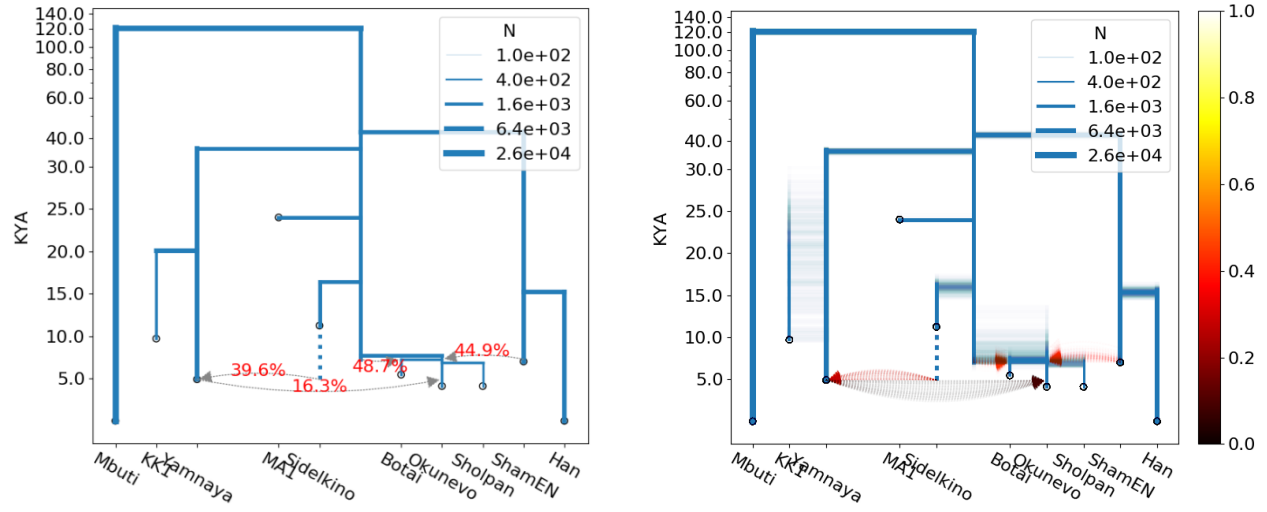

**Fig. S21.**

Our final estimated model, obtained by adding a Yamnaya->Okunevo pulse to Fig. S20. This is the same as the demography shown in Fig. 4 of the main text. On the left is our final point estimate; on the right we show 300 parametric bootstrap simulations, overlaid with transparency.

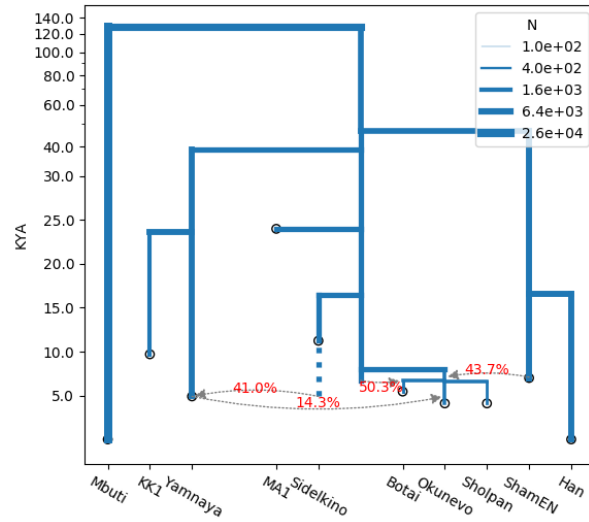

**Fig. S22.**

The result from refitting the demography in Fig. S21 but excluding Botai, Sholpan, and KK1 from ascertainment (along with Sidelkino, MA1, Okunevo, and ShamEN), so all SNPs are ascertained on the very high-coverage (>20x) Yamnaya, Mbuti, and Han samples. The inferred result is nearly identical, suggesting that potential errors such as inflated singleton counts in Botai, KK1, and Sholpan are not substantially biasing the inference.

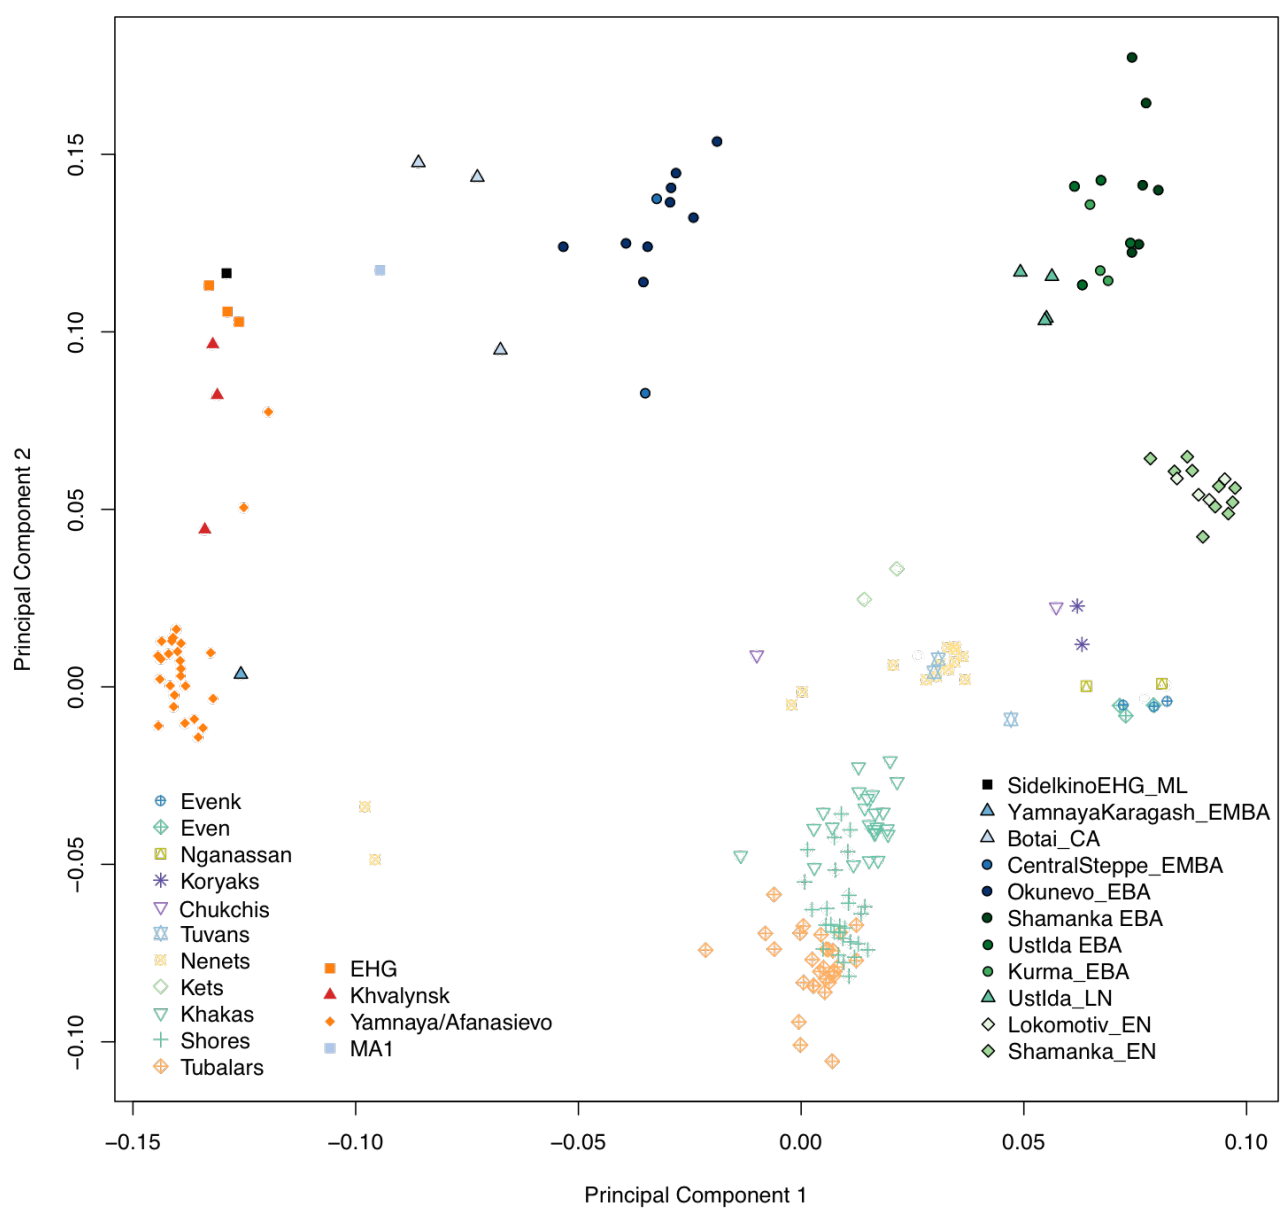

**Fig. S23.**

PCA estimated with ancient samples from the Steppe and Siberia, together with present-day Siberian populations.

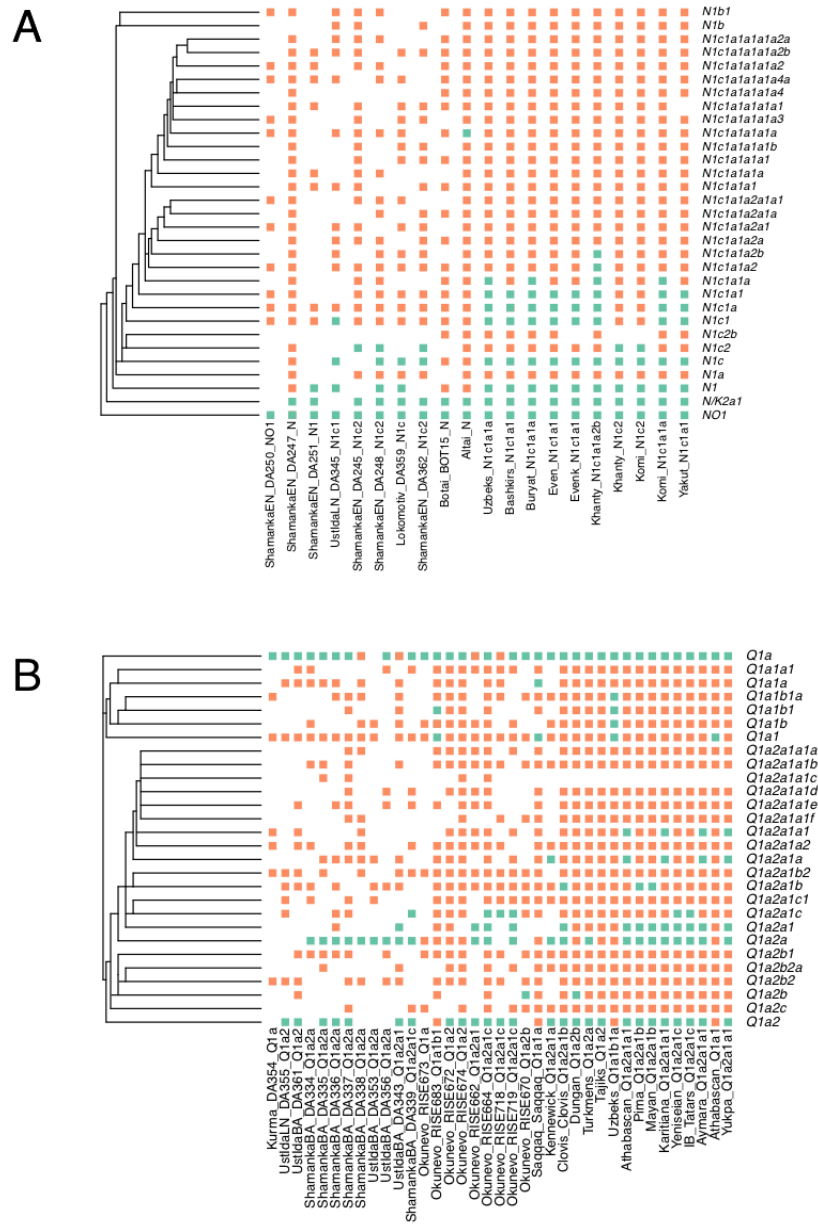

**Fig. S24.**

Ancient and present-day samples allele status at relevant tips and nodes of the ISOGG Y-chromosomal tree for A) haplogroup N and B) haplogroup Q. Ancestral and derived alleles are represented in orange and green, respectively, and missing data is represented in white. We added tips at relevant nodes of the tree for allowing visualization of ancestral and derived alleles at these.

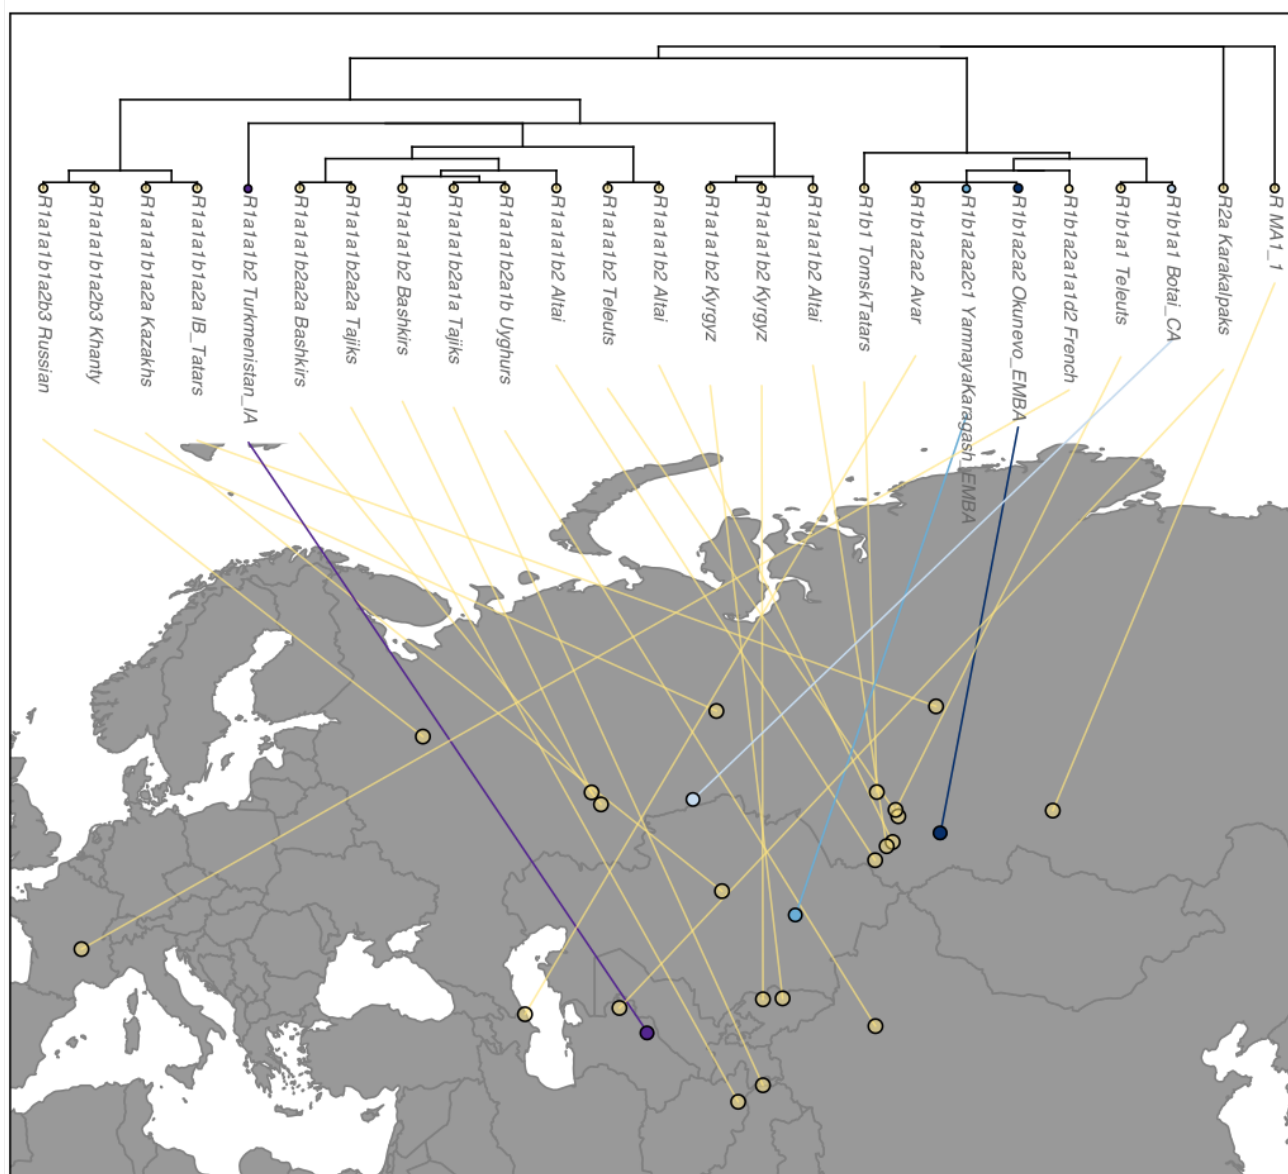

**Fig. S25.**  
Geographical location of ancient samples belonging to major clade R of the Y-chromosome.

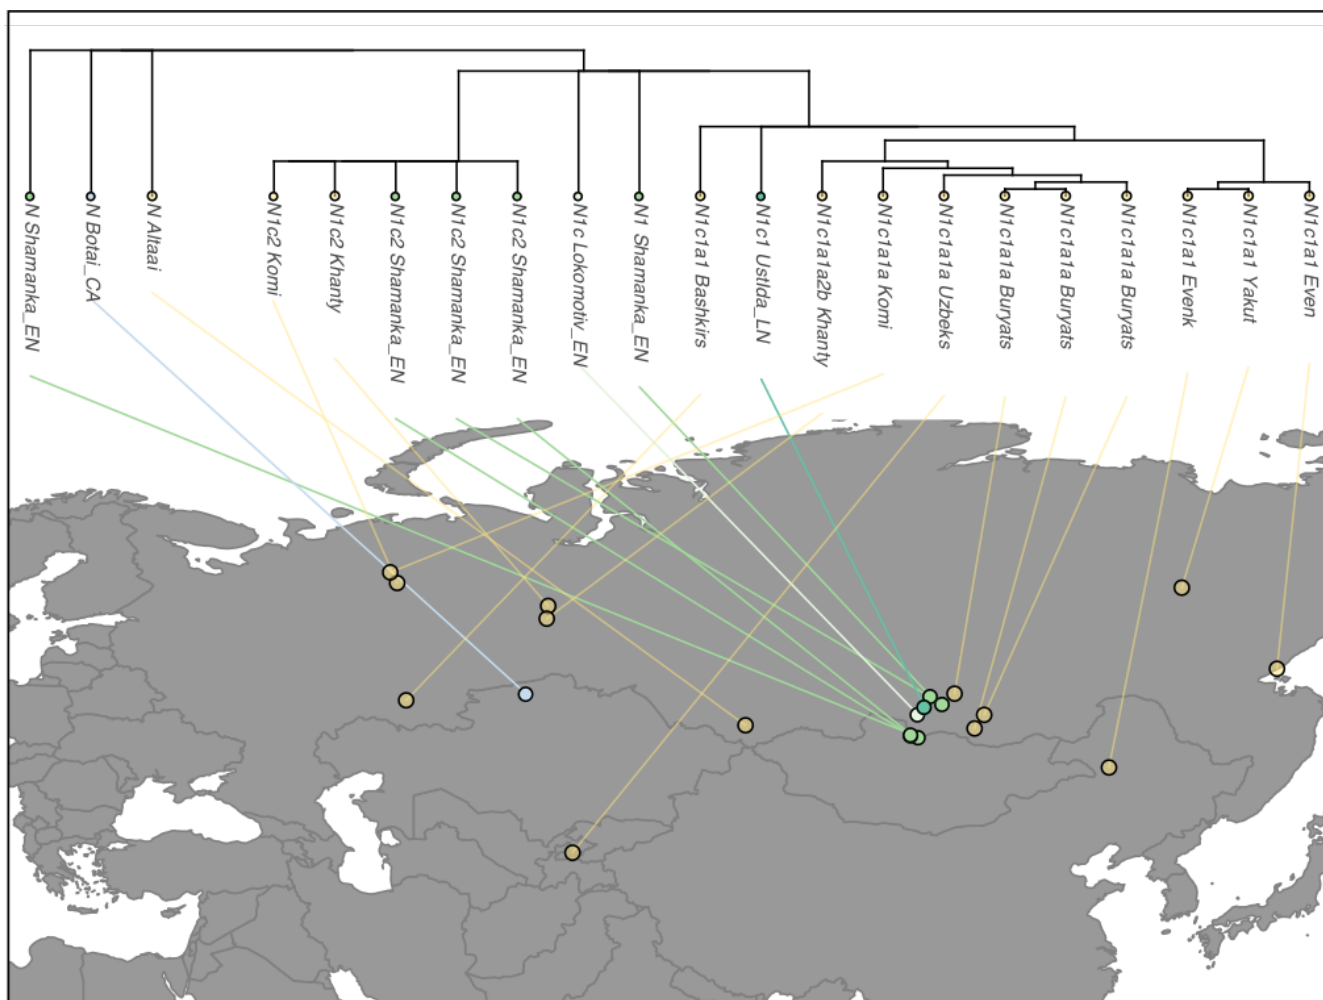

**Fig. S26.**

Geographical location of ancient samples belonging to major clade N of the Y-chromosome.



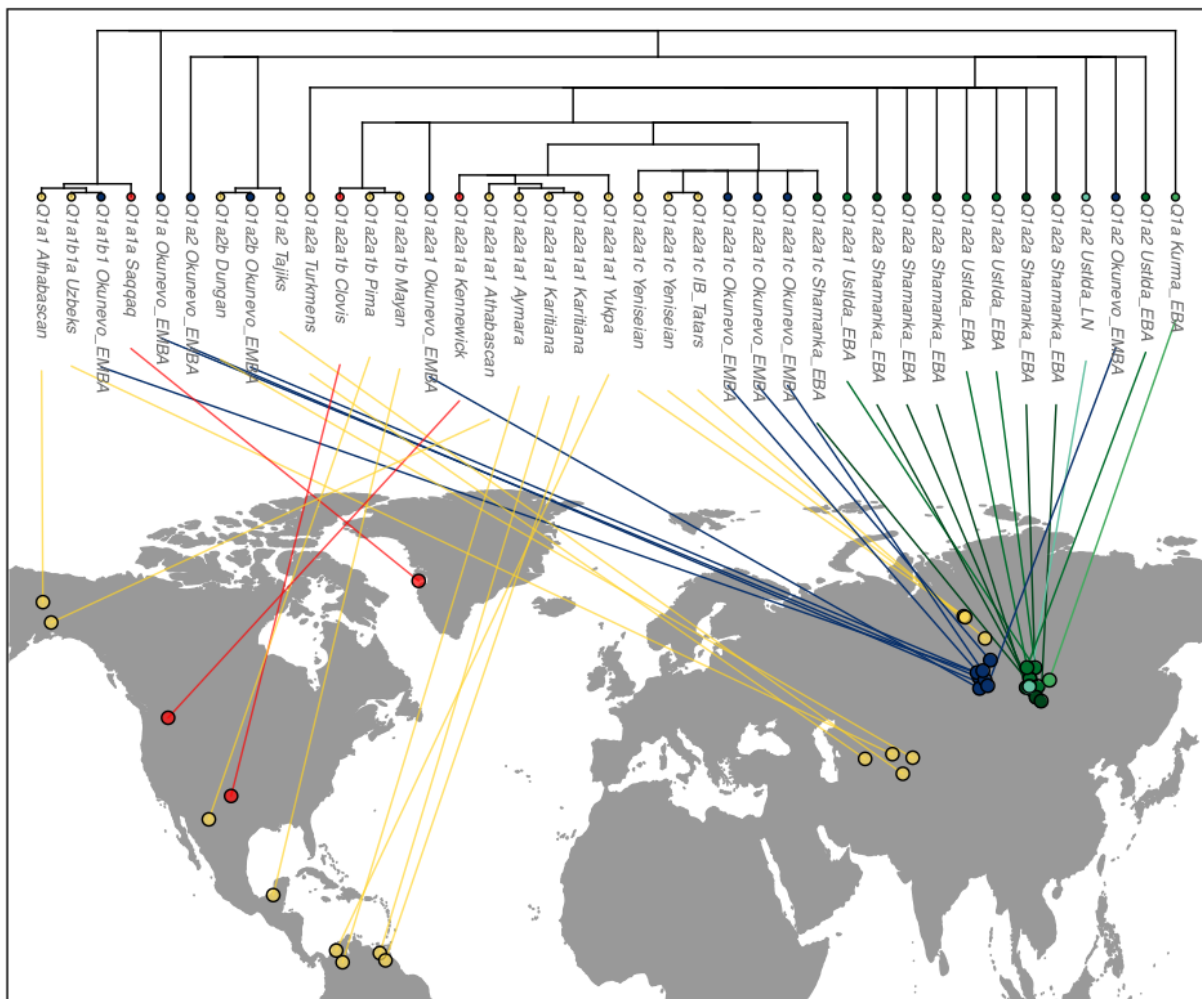

**Fig. S27.**

Geographical location of ancient samples belonging to major clade Q of the Y-chromosome.

paramfiles/gr6x :: Mbu Xio CHG Yam 0.000000 0.006323 0.006323 0.003571 1.771

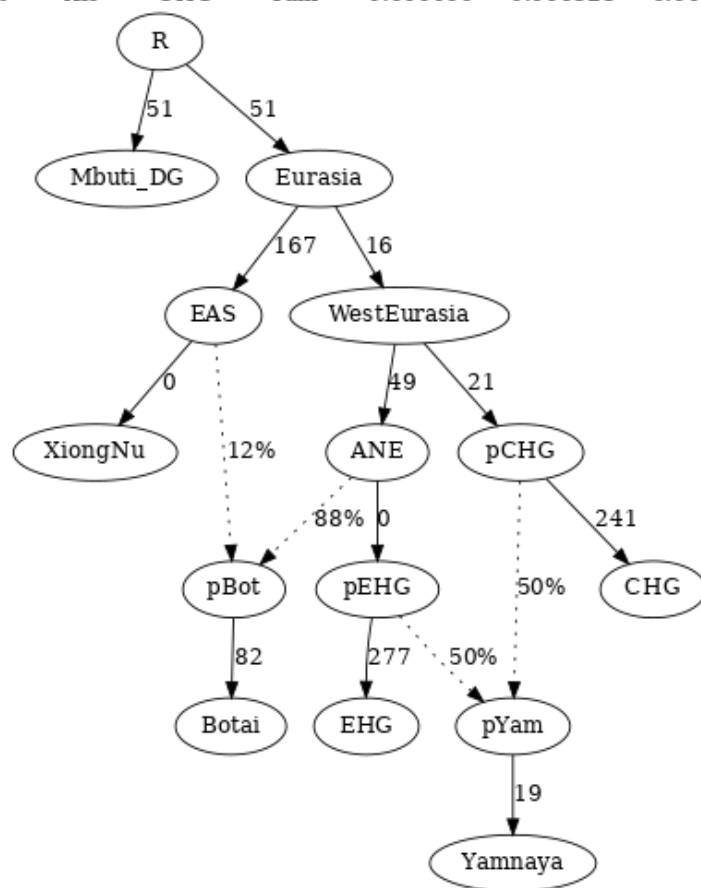

**Figure S28.**

qpGraph model relating Botai, Yamnaya, and 4 other populations. The model includes no direct Botai-Yamnaya gene flow, and all f4 statistics fit well ( $|Z| \leq 1.77$ ).

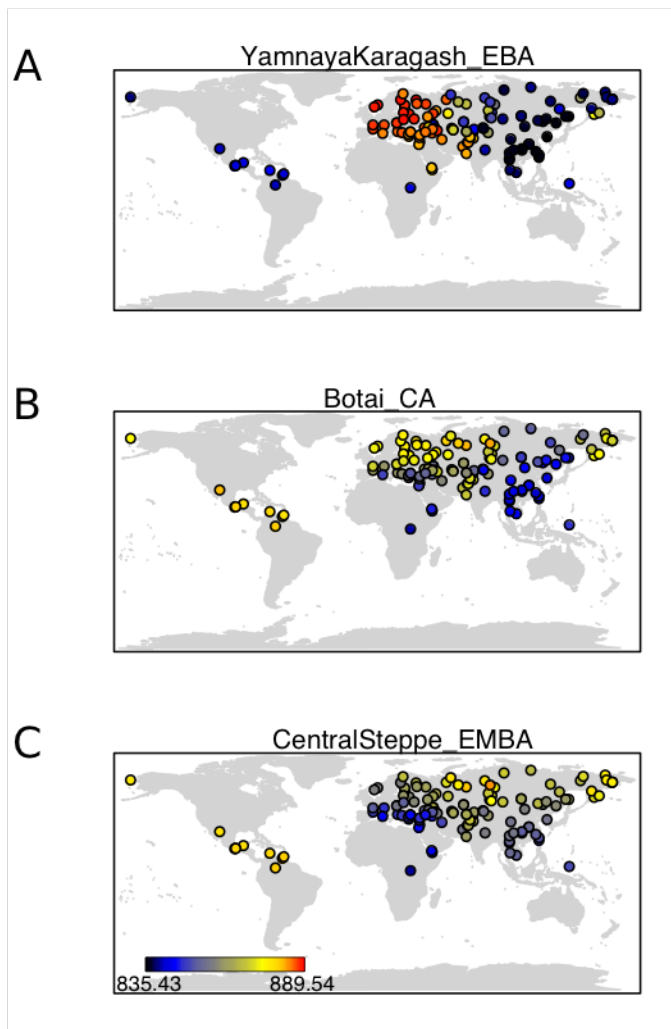

**Fig. S29.**

Mean haplotype sharing with present-day populations and A) YamnayaKaragash\_EBA, B) Botai\_CA, and C) Sholpan (CentralSteppe\_EMBA).

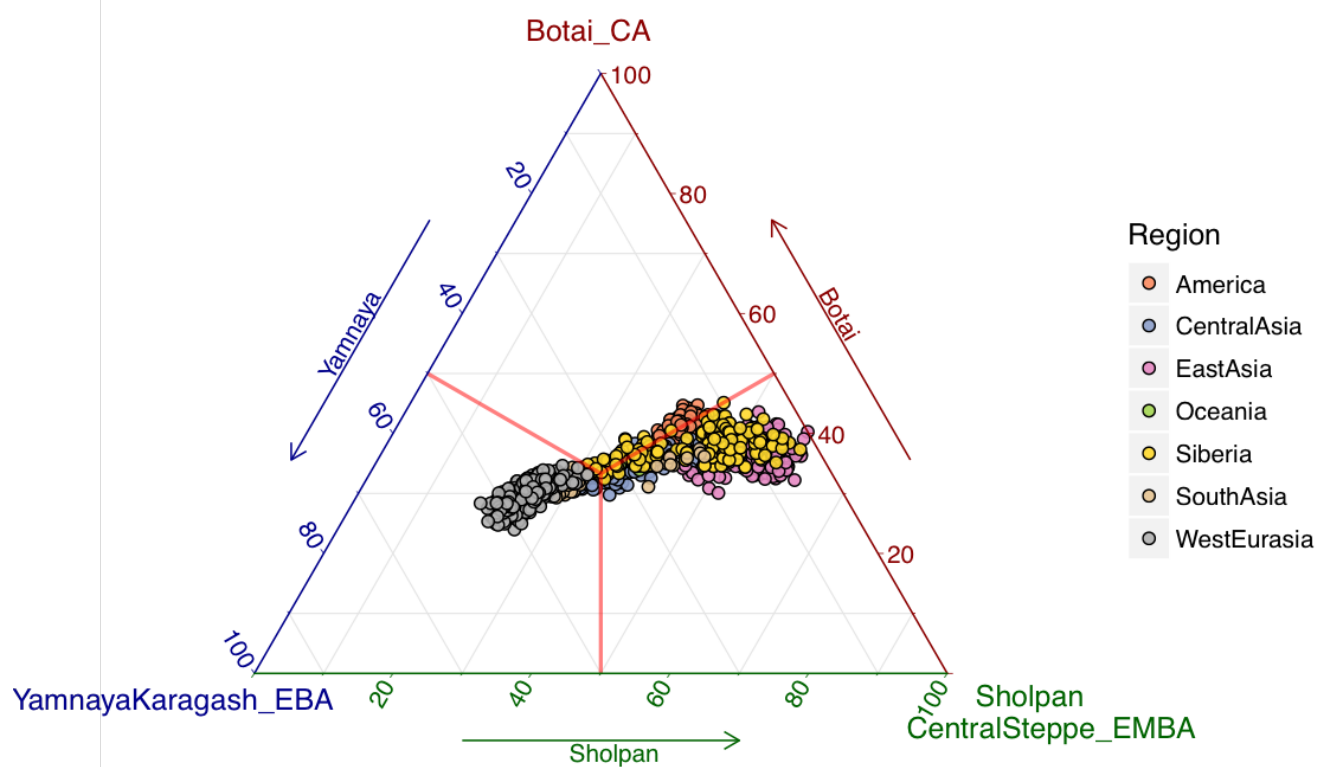

**Fig. S30.**

Ternary plot of mean haplotype sharing between the high-coverage samples YamnayaKaragash\_EBA, Botai\_CA, and Sholpan (CentralSteppe\_EMBA) with present-day populations.

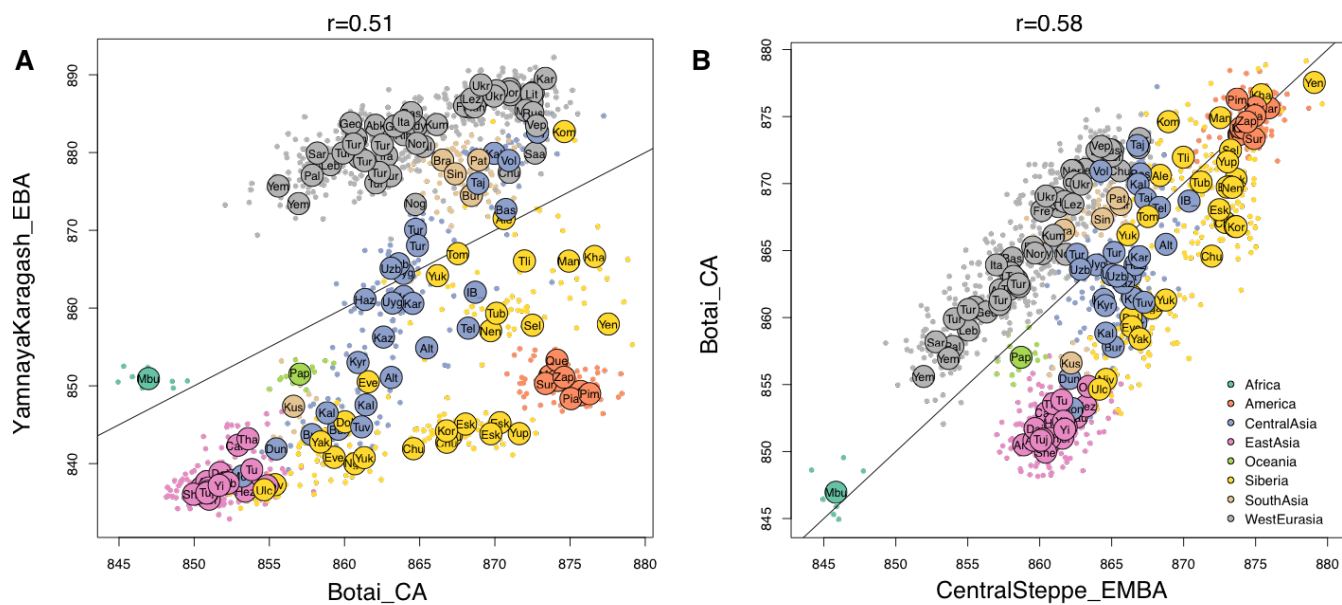

**Fig. S31.**

Pairwise comparisons of ancient samples in terms of haplotype sharing with present-day populations. A) YamnayaKaragash\_EBA and Botai\_CA, B) Botai\_CA, and Sholpan (CentralSteppe\_EMBA).

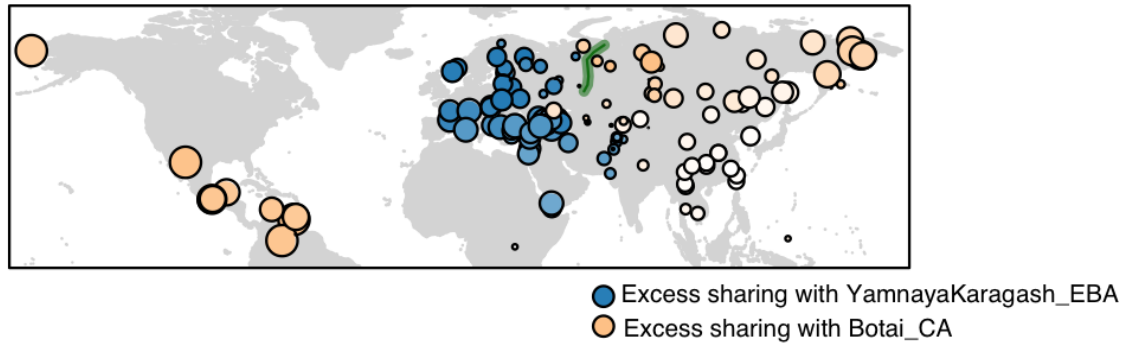

**Fig. S32.**

Total variation distance comparing Yamnaya and Botai in terms haplotype sharing with modern populations. The color of the circles indicates raw haplotype donation and the size of each circle represents the magnitude of the difference in haplotype sharing between Yamnaya (blue) and Botai (orange). The green line represents the Ural Mountains.

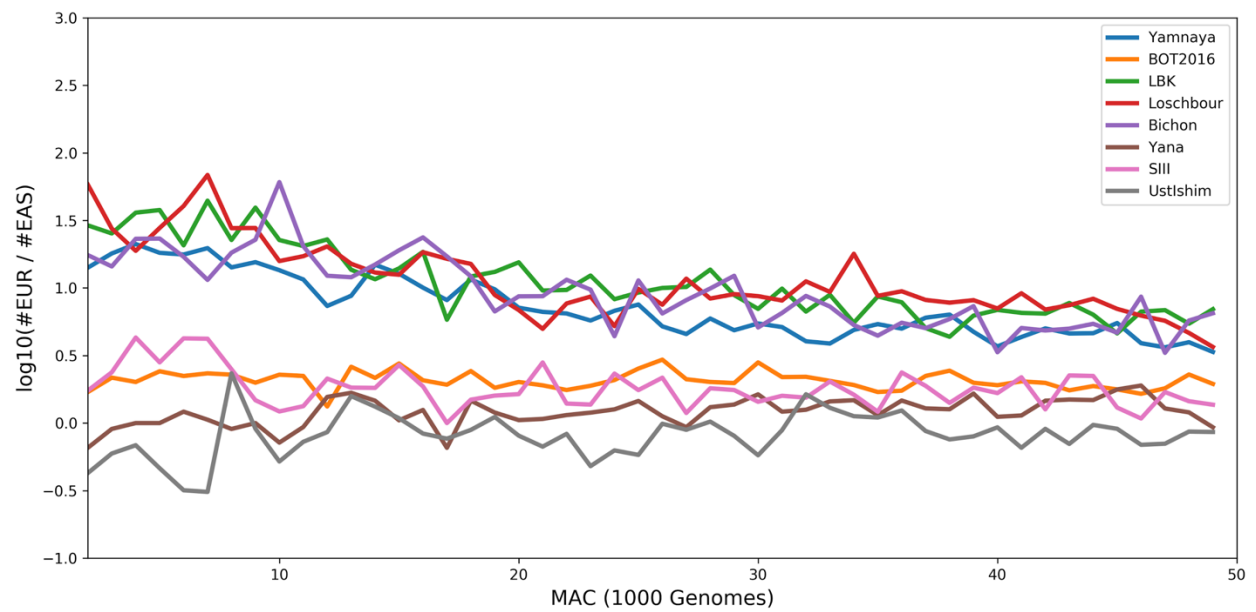

**Fig. S33.**

Relative numbers of variants that are shared by European (EUR) and East Asian (EAS) populations in the 1000 Genomes Project as a function of minor allele count (MAC) per ancient genome (designated by line color, see legend). Values less than zero indicate higher sharing with East Asian populations (e.g. as seen for Ust-Ishim, gray), and values greater than 0 indicate higher sharing with Europeans (e.g. as seen for Loschbour, red).



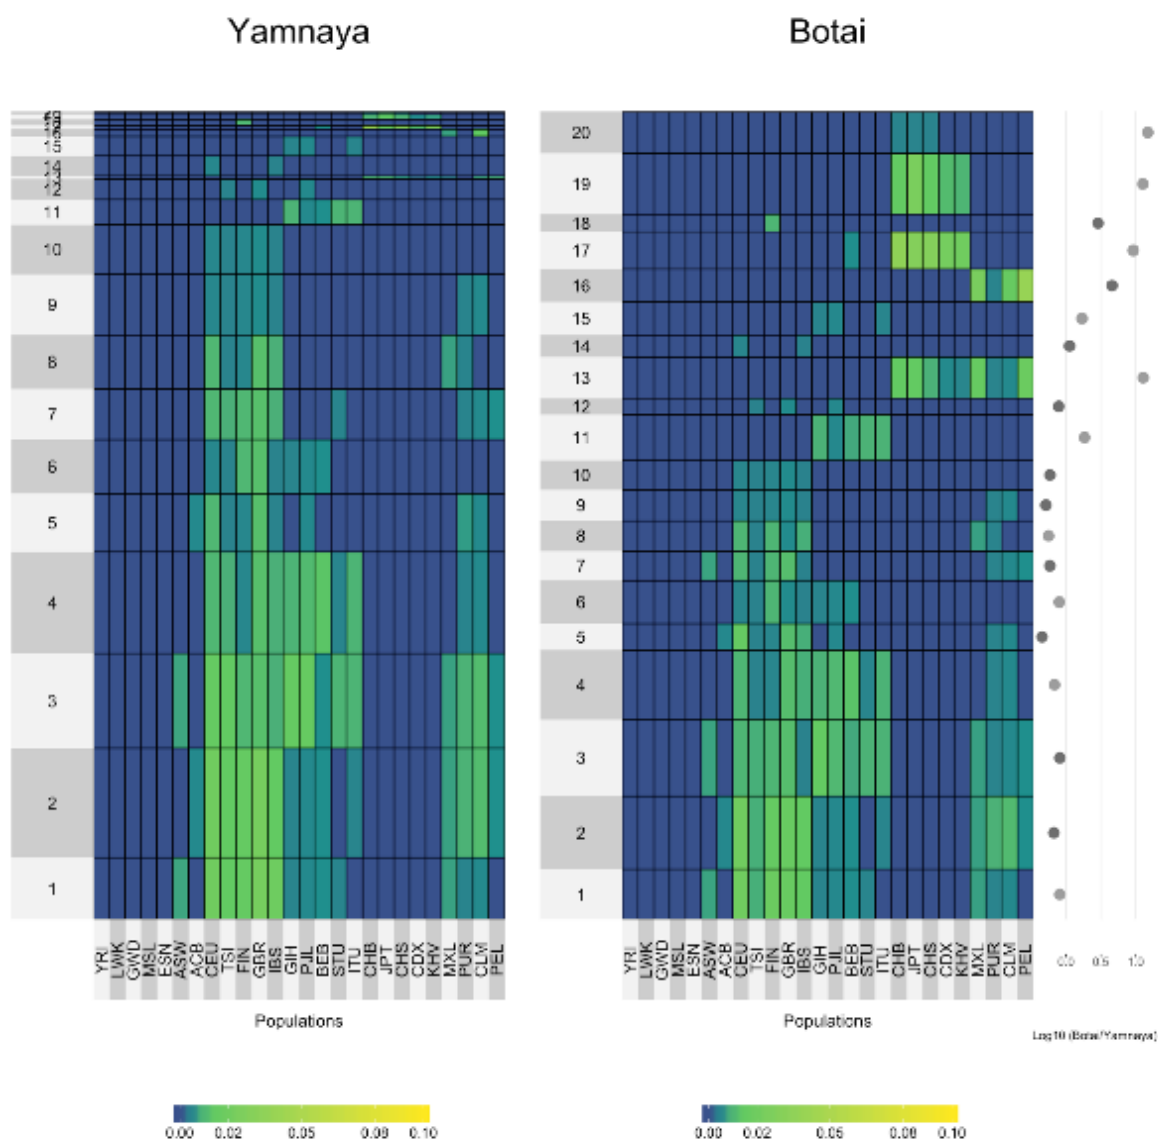

**Fig. S34.**

The geographic distribution of variants that are shared between modern populations and Yamnaya (left) or Botai (right). Variants have been categorized into 20 discrete geographic patterns. Color intensity represents minor allele frequency, and the relative abundance of each category is represented by breadth along the y-axis. The rightmost panel illustrates the difference in abundance of each category by displaying the ( $\log_{10}$ ) ratio of the fraction of SNPs that fall into that category in Botai vs. Yamnaya. Botai has many more variants that are found in East Asia or East Asia and the Americas (Categories 12, 17, 19, 20). Yamnaya sharing is enriched for variants that are found in Europe-alone or Europe and the Americas (Categories 5, 9). Population labels follow the 1000 Genomes abbreviations.

**A**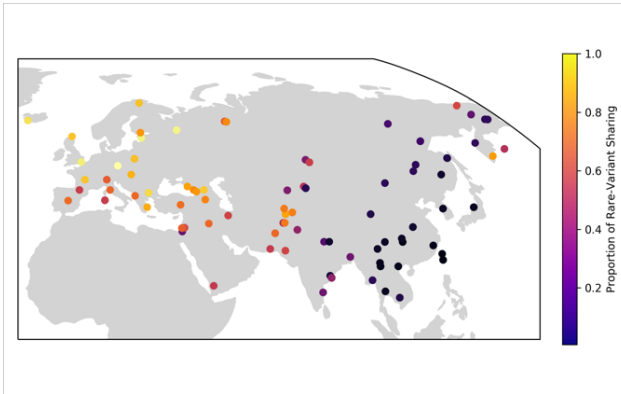**B**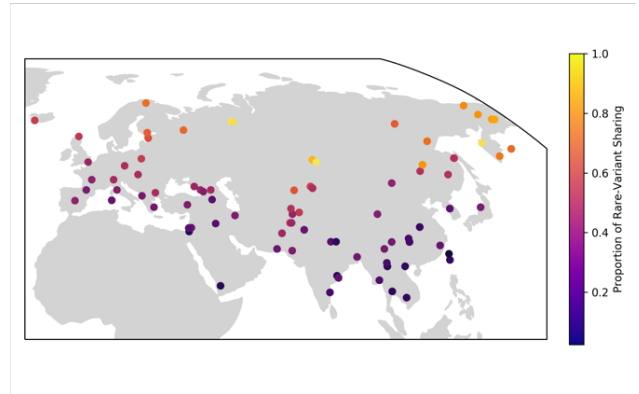

**Fig. S35.**

Gradients in rare variant sharing between (A) Yamnaya and (B) Botai.

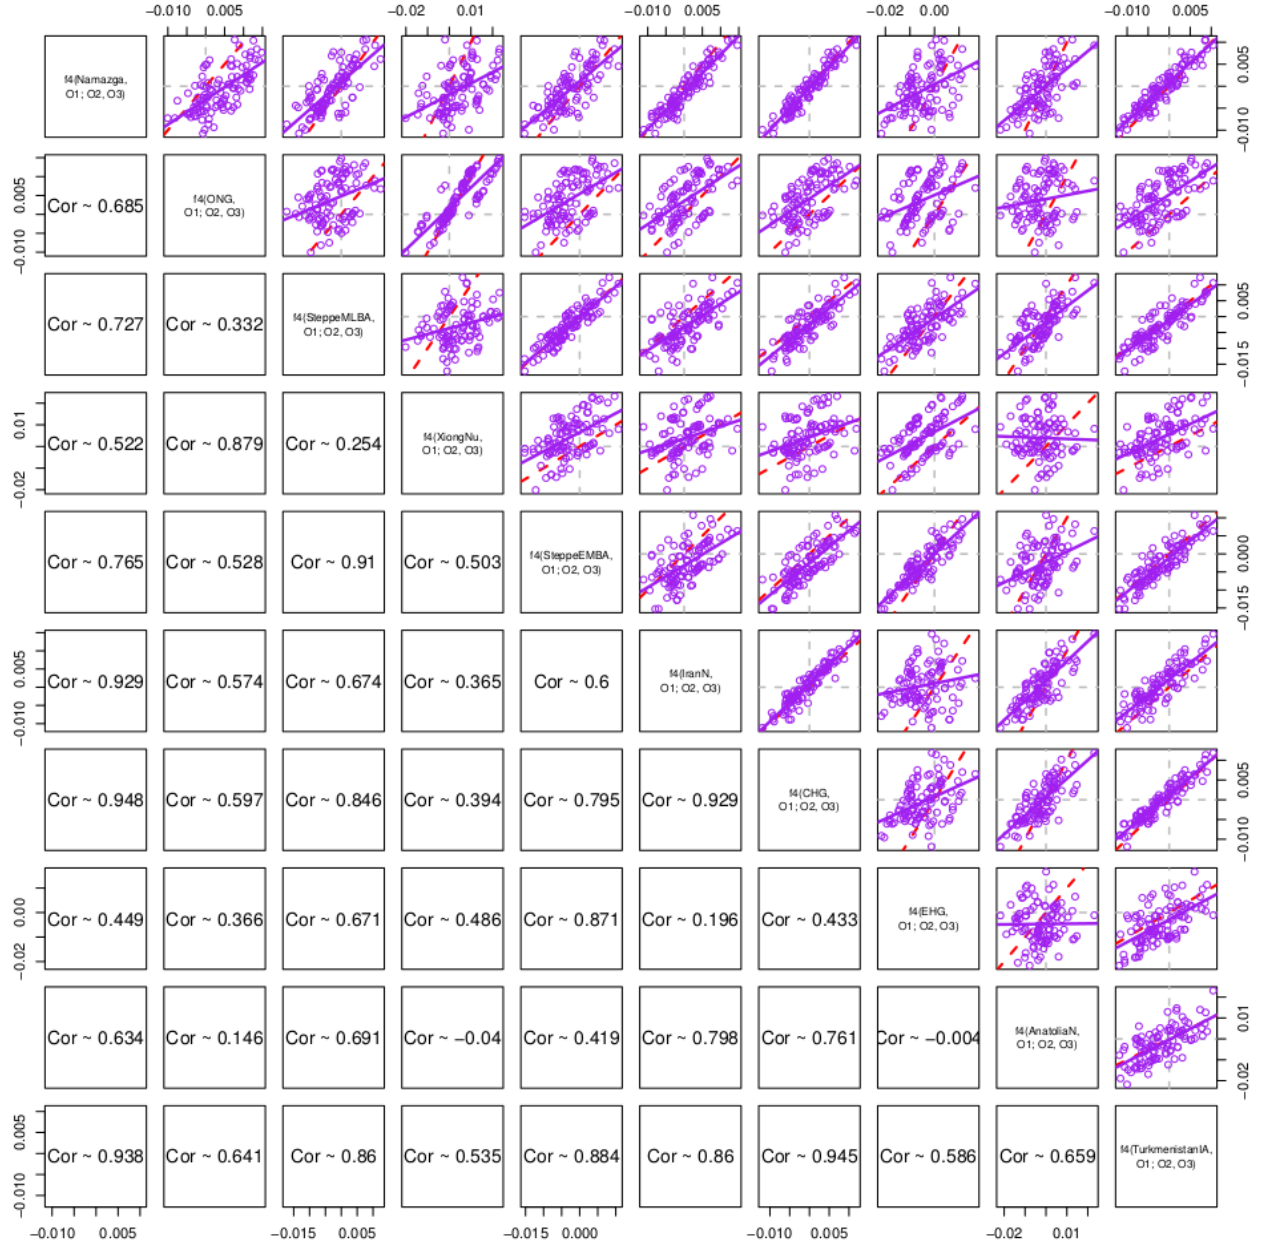

**Fig. S36.**

Assessment of the information provided by the set of seven outgroups used in the qpAdm models. We computed all possible  $f_4$ -statistics of the form  $f_4(\text{Source}_i, \text{Outgroup}_1; \text{Outgroup}_2, \text{Outgroup}_3)$ , including all the potential sources used in the qpAdm models as well as all possible triplets in the following set of seven outgroups: Mbuti, Ust'Ishim, Clovis, Kostenki14, Switzerland\_HG, Natufian, and MA1. For each pair of sources, we plot the corresponding  $f_4$  values in the upper section of the matrix and show the Spearman correlation coefficient in the lower section. Ancestry from sources with high correlation scores will be more difficult to differentiate in qpAdm. We confirm these results using a formal qpWave test (Section S2.10).

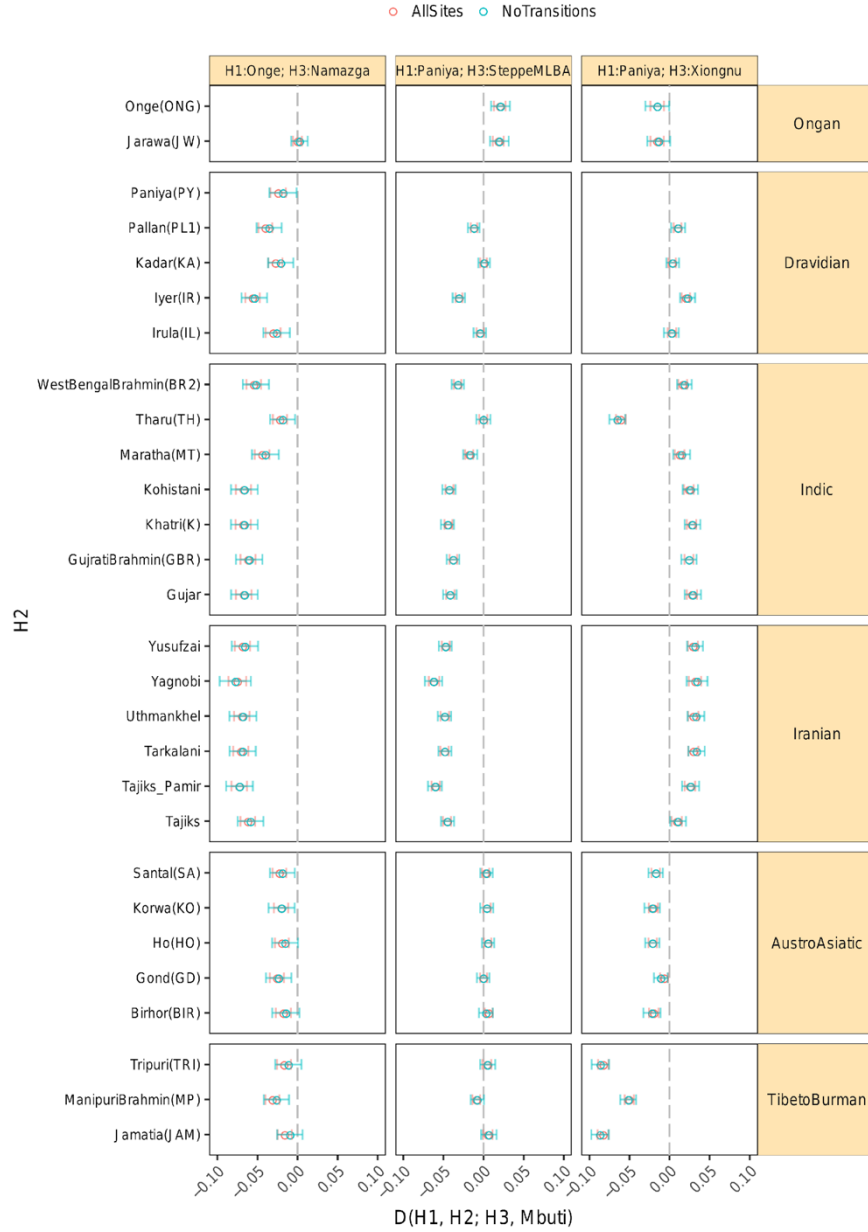

**Fig. S37.**

$D$ -statistics showing that South Asian populations are consistent with ancestry from 4 sources represented by Onge, Namazga, Late Bronze Age steppe, and Xiongnu nomads (representing East Asians). South Asian populations were grouped according to their language family. For each test, 2 results are shown: one where all sites in the dataset were considered (red points) and one where transition polymorphisms were excluded from the analysis (green points). Positive  $D$ -statistics indicate that  $H_1$  shares more alleles with  $H_3$  than  $H_2$ , while negative statistics indicate that  $H_2$  shares more alleles with  $H_3$  than  $H_1$ . Error bars represent  $\sim 3.3$  standard errors, which corresponds to a  $p$ -value  $\sim 0.001$ .

| Sample    | Population         | Approach                       | Total reads | Trimmed    | Mapped     | Endogenous% | Non-duplicate mapped | Clonality % | Coverage | Probability Authentic (95 % CI) |
|-----------|--------------------|--------------------------------|-------------|------------|------------|-------------|----------------------|-------------|----------|---------------------------------|
| BOT14     | Botai              | Shotgun/Illumina 2500/HiSeqX10 | 2192272501  | 875017599  | 338021125  | 40.2        | 168384462            | 31.8        | 3.7      | 0.9791 (0.9675-0.9864)          |
| BOT15     | Botai              | Shotgun/Illumina 2500/HiSeqX10 | 3258239520  | 1433625118 | 212931720  | 14.6        | 126664850            | 29          | 3        | 0.9980 (0.9863-0.9998)          |
| BOT2016   | Botai              | Shotgun/Illumina 2500/HiSeqX10 | 6563324840  | 2773092327 | 849998291  | 30.6        | 519384291            | 24          | 13.6     | 0.9948 (0.9876-0.9984)          |
| Yamnaya   | Yamnaya            | Shotgun/Illumina 2500/HiSeqX10 | 6820561800  | 3407416890 | 2675370010 | 77.3        | 1123187429           | 46.1        | 25.2     | 0.9886 (0.9827-0.9929)          |
| EBA1      | CentralSteppe_EMBA | Shotgun/Illumina 2500/HiSeqX10 | 3368109128  | 1434495369 | 460033579  | 32.2        | 257270049            | 20.6        | 4.5      | 0.9566 (0.9439-0.9673)          |
| EBA2      | CentralSteppe_EMBA | Shotgun/Illumina 2500/HiSeqX10 | 2482629018  | 1191642239 | 644534121  | 49.9        | 394357733            | 23.5        | 9.1      | 0.9937 (0.9873-0.9982)          |
| Sidelkino | SidelkinoEHG_ML    | Shotgun/Illumina 2500          | 374758967   | 339356731  | 240884232  | 71          | 174337943            | 4           | 2.9      | 0.9954 (0.9885-0.9990)          |
| DA379     | Namazga_CA         | Shotgun/Illumina 2500          | 167100464   | 121785756  | 3345648    | 2           | 3292668              | 1.6         | 0.1      | 0.9855 (0.9288-0.9982)          |
| DA380     | Namazga_CA         | Shotgun/Illumina 2500          | 146823356   | 123045346  | 29603426   | 20.2        | 28144957             | 4.9         | 0.5      | 0.9892 (0.9726-0.9977)          |
| DA381     | Namazga_CA         | Shotgun/Illumina 2500          | 301840070   | 235646784  | 56568028   | 18.7        | 55097492             | 2.6         | 0.8      | 0.9996 (0.9925-0.9999)          |
| DA383     | Namazga_CA         | Shotgun/Illumina 2500          | 150392401   | 128810489  | 52626463   | 35          | 49579801             | 5.8         | 0.8      | 0.9988 (0.9825-0.9997)          |
| DA382     | Turkmenistan_IA    | Shotgun/Illumina 2500          | 302180862   | 277799882  | 148879656  | 49.3        | 145713533            | 2.1         | 2.5      | 0.9996 (0.9940-0.9999)          |
| MA2195    | Anatolia_Ottoman   | Shotgun/Illumina 2500          | 139394266   | 120773729  | 52093247   | 37.4        | 44452475             | 14.7        | 0.9      | 0.9995 (0.9906-0.9999)          |
| MA2196    | Anatolia_Ottoman   | Shotgun/Illumina 2500          | 19263518    | 18517734   | 12791403   | 66.4        | 12328624             | 3.6         | 0.3      | 0.9898 (0.9692-0.9983)          |
| MA2197    | Anatolia_IA        | Shotgun/Illumina 2500          | 14202511    | 11907084   | 6703251    | 47.2        | 6367699              | 5           | 0.1      | 0.9983 (0.9671-0.9997)          |
| MA2198    | Anatolia_IA        | Shotgun/Illumina 2500          | 68947699    | 66868570   | 38282336   | 55.5        | 36731227             | 4.1         | 0.8      | 0.9832 (0.9703-0.9909)          |
| MA2200    | Anatolia_MLBA      | Shotgun/Illumina 2500          | 278699922   | 234951794  | 135920736  | 48.8        | 121592180            | 10.5        | 2.2      | 0.9877 (0.9771-0.9944)          |
| MA2203    | Anatolia_MLBA      | Shotgun/Illumina 2500          | 200867597   | 169526141  | 52589100   | 26.2        | 49614004             | 5.7         | 0.9      | 0.9996 (0.9928-0.9999)          |
| MA2205    | Anatolia_MLBA      | Shotgun/Illumina 2500          | 85020838    | 79162433   | 44015910   | 51.8        | 42080032             | 4.4         | 0.8      | 0.9995 (0.9924-0.9999)          |
| MA2206    | Anatolia_MLBA      | Shotgun/Illumina 2500          | 248367711   | 214763480  | 40763269   | 16.4        | 22308224             | 45.3        | 0.4      | 0.9943 (0.9843-0.9992)          |
| MA2208    | Anatolia_MLBA      | Shotgun/Illumina 2500          | 125464977   | 67512900   | 27649991   | 22          | 6810359              | 75.4        | 0.1      | 0.9449 (0.8869-0.9819)          |
| MA2210    | Anatolia_EBA       | Shotgun/Illumina 2500          | 126460611   | 109308921  | 50150042   | 39.7        | 47737328             | 4.8         | 0.9      | 0.9997 (0.9939-0.9999)          |
| MA2212    | Anatolia_EBA       | Shotgun/Illumina 2500          | 239127212   | 149093443  | 64936710   | 27.2        | 59049012             | 9.1         | 0.9      | 0.9989 (0.9895-0.9988)          |
| MA2213    | Anatolia_EBA       | Shotgun/Illumina 2500          | 368438736   | 277789904  | 72819648   | 19.8        | 68976171             | 5.3         | 1.2      | 0.9944 (0.9820-0.9995)          |
| RISE515   | Okunevo_EMBA       | Shotgun/Illumina 2500          | 1783268077  | 1461556032 | 199713542  | 13.7        | 26762962             | 86.6        | 0.6      | 0.9998 (0.9954-1.0000)          |
| RISE516   | Okunevo_EMBA       | Shotgun/Illumina 2500          | 1278867523  | 1014478964 | 138968978  | 13.7        | 44121941             | 68.3        | 0.9      | 0.9998 (0.9957-1.0000)          |
| RISE662   | Okunevo_EMBA       | Shotgun/Illumina 2500          | 225121907   | 166283480  | 102779809  | 61.8        | 46334917             | 54.9        | 0.6      | 0.9997 (0.9932-0.9999)          |
| RISE664   | Okunevo_EMBA       | Shotgun/Illumina 2500          | 389290051   | 364213753  | 254781563  | 70          | 233010348            | 8.5         | 4.6      | 0.9525 (0.9348-0.9650)          |
| RISE667   | Okunevo_EMBA       | Shotgun/Illumina 2500          | 54173973    | 49772083   | 7318294    | 14.7        | 10279306             | 31          | 0.2      | 0.9994 (0.9879-0.9999)          |
| RISE670   | Okunevo_EMBA       | Shotgun/Illumina 2500          | 108012364   | 100845664  | 32658656   | 32.4        | 31326486             | 4.1         | 0.7      | 0.9984 (0.9824-0.9998)          |
| RISE671   | Okunevo_EMBA       | Shotgun/Illumina 2500          | 550866525   | 476213513  | 15353684   | 3.2         | 14693369             | 4.3         | 0.3      | 0.9997 (0.9933-1.0000)          |
| RISE672   | Okunevo_EMBA       | Shotgun/Illumina 2500          | 414291899   | 312321446  | 95421239   | 30.6        | 71536424             | 21.3        | 1.2      | 0.9992 (0.9907-0.9999)          |
| RISE673   | Okunevo_EMBA       | Shotgun/Illumina 2500          | 144799175   | 132936270  | 5719317    | 4.3         | 5701246              | 41.4        | 0.1      | 0.9951 (0.9776-0.9994)          |
| RISE674   | Okunevo_EMBA       | Shotgun/Illumina 2500          | 245701496   | 239518662  | 136219559  | 56.9        | 125799394            | 7.6         | 2.6      | 0.9992 (0.9916-0.9999)          |
| RISE675   | Okunevo_EMBA       | Shotgun/Illumina 2500          | 64309347    | 61733688   | 31770813   | 51.5        | 23328642             | 26.6        | 0.5      | 0.9992 (0.9845-0.9999)          |
| RISE677   | Okunevo_EMBA       | Shotgun/Illumina 2500          | 113279212   | 109527506  | 3671588    | 3.4         | 12617825             | 34.9        | 0.3      | 0.9993 (0.9882-0.9999)          |
| RISE680   | Okunevo_EMBA       | Shotgun/Illumina 2500          | 570996627   | 495906372  | 80009784   | 16.1        | 72927202             | 8.9         | 1.5      | 0.9997 (0.9946-1.0000)          |
| RISE681   | Okunevo_EMBA       | Shotgun/Illumina 2500          | 155122917   | 137120090  | 23342542   | 17          | 24992043             | 80.4        | 0.5      | 0.9979 (0.9925-0.9997)          |
| RISE683   | Okunevo_EMBA       | Shotgun/Illumina 2500          | 459719628   | 420130869  | 154765683  | 36.8        | 123037686            | 20.5        | 2        | 0.9995 (0.9909-0.9999)          |
| RISE684   | Okunevo_EMBA       | Shotgun/Illumina 2500          | 57184624    | 53344713   | 25467314   | 47.7        | 24747517             | 2.8         | 0.5      | 0.9841 (0.9628-0.9953)          |
| RISE685   | Okunevo_EMBA       | Shotgun/Illumina 2500          | 267430858   | 231916916  | 100594496  | 43.4        | 62567628             | 37.8        | 1.3      | 0.9739 (0.9586-0.9837)          |
| RISE718   | Okunevo_EMBA       | Shotgun/Illumina 2500          | 78903540    | 75346364   | 46257278   | 61.4        | 42442137             | 8.2         | 0.8      | 0.9780 (0.9611-0.9897)          |
| RISE719   | Okunevo_EMBA       | Shotgun/Illumina 2500          | 68022374    | 66251023   | 30840649   | 46.6        | 26628029             | 13.6        | 0.6      | 0.9874 (0.9760-0.9940)          |
| DA245     | Shamanka_EN        | Shotgun/Illumina 2500          | 162814301   | 157893611  | 107620040  | 68.2        | 101495484            | 5.7         | 2.2      | 0.9945 (0.9861-0.9992)          |
| DA246     | Shamanka_EN        | Shotgun/Illumina 2500          | 196808425   | 192033838  | 142597590  | 74.3        | 129711403            | 9           | 2.9      | 0.9942 (0.9840-0.9992)          |
| DA247     | Shamanka_EN        | Shotgun/Illumina 2500          | 227346763   | 218167045  | 123110325  | 56.4        | 113828443            | 7.5         | 2.4      | 0.9772 (0.9644-0.9855)          |
| DA248     | Shamanka_EN        | Shotgun/Illumina 2500          | 176878767   | 169341415  | 116361008  | 68.7        | 104983472            | 9.8         | 2.3      | 0.9763 (0.9613-0.9876)          |
| DA249     | Shamanka_EN        | Shotgun/Illumina 2500          | 327775553   | 318997226  | 230221567  | 72.2        | 204074308            | 11.4        | 4.5      | 0.9642 (0.9521-0.9740)          |
| DA250     | Shamanka_EN        | Shotgun/Illumina 2500          | 154098108   | 140930953  | 57434613   | 40.8        | 54052423             | 5.9         | 0.9      | 0.9962 (0.9826-0.9997)          |
| DA251     | Shamanka_EN        | Shotgun/Illumina 2500          | 232916764   | 210122856  | 26853705   | 12.8        | 25878772             | 3.6         | 0.6      | 0.9879 (0.9739-0.9976)          |
| DA252     | Shamanka_EN        | Shotgun/Illumina 2500          | 200437910   | 192696563  | 117408213  | 60.9        | 108012064            | 8           | 2.4      | 0.9839 (0.9663-0.9949)          |
| DA253     | Shamanka_EN        | Shotgun/Illumina 2500          | 218275178   | 209560446  | 139008225  | 66.3        | 126504028            | 9           | 2.7      | 0.9969 (0.9916-0.9993)          |
| DA334     | Shamanka_EBA       | Shotgun/Illumina 2500          | 103757960   | 95727037   | 26361756   | 27.5        | 24589270             | 6.7         | 0.5      | 0.9683 (0.9536-0.9808)          |
| DA335     | Shamanka_EBA       | Shotgun/Illumina 2500          | 81631491    | 76980076   | 34539800   | 44.9        | 22685723             | 34.3        | 0.5      | 0.9987 (0.9936-0.9997)          |
| DA336     | Shamanka_EBA       | Shotgun/Illumina 2500          | 97815430    | 91827389   | 40179131   | 43.8        | 32714889             | 18.6        | 0.7      | 0.9758 (0.9620-0.9848)          |
| DA337     | Shamanka_EBA       | Shotgun/Illumina 2500          | 105263805   | 98281097   | 62573101   | 63.7        | 56238516             | 10.1        | 1.1      | 0.9816 (0.9714-0.9891)          |
| DA338     | Shamanka_EBA       | Shotgun/Illumina 2500          | 94862480    | 88118581   | 23377137   | 26.5        | 20699277             | 11.5        | 0.4      | 0.9774 (0.9629-0.9892)          |
| DA339     | Shamanka_EBA       | Shotgun/Illumina 2500          | 72483521    | 69795739   | 15572767   | 22.3        | 14097198             | 9.5         | 0.3      | 0.9929 (0.9819-0.9993)          |
| DA340     | Lokomotiv_EN       | Shotgun/Illumina 2500          | 208345480   | 188293011  | 31481459   | 16.7        | 30683122             | 2.5         | 0.6      | 0.9993 (0.9863-0.9999)          |
| DA341     | Lokomotiv_EN       | Shotgun/Illumina 2500          | 118127945   | 110691995  | 59780536   | 54          | 56135151             | 6.1         | 1.2      | 0.9945 (0.9826-0.9993)          |
| DA342     | UstIda_LN          | Shotgun/Illumina 2500          | 195311656   | 186638454  | 90564181   | 48.5        | 83344165             | 8           | 1.7      | 0.9947 (0.9846-0.9991)          |
| DA343     | UstIda_EBA         | Shotgun/Illumina 2500          | 76731250    | 71099845   | 34742212   | 48.9        | 29838435             | 14.1        | 0.6      | 0.9914 (0.9794-0.9989)          |
| DA344     | UstIda_LN          | Shotgun/Illumina 2500          | 50563357    | 46552213   | 24151745   | 51.9        | 11222522             | 53.5        | 0.2      | 0.9826 (0.9599-0.9941)          |
| DA345     | UstIda_LN          | Shotgun/Illumina 2500          | 93807114    | 88926771   | 53959672   | 60.7        | 49305041             | 8.6         | 1        | 0.9543 (0.9344-0.9693)          |
| DA353     | UstIda_EBA         | Shotgun/Illumina 2500          | 72655137    | 60926879   | 38003425   | 62.4        | 10048972             | 73.6        | 0.2      | 0.9502 (0.8794-0.9834)          |
| DA354     | Kurma_EBA          | Shotgun/Illumina 2500          | 167216578   | 126180424  | 17777366   | 14.1        | 12815167             | 27.9        | 0.2      | 0.9987 (0.9729-0.9998)          |
| DA355     | UstIda_LN          | Shotgun/Illumina 2500          | 150852349   | 125317315  | 36542206   | 29.2        | 27240982             | 25.5        | 0.4      | 0.9990 (0.9828-0.9998)          |
| DA356     | UstIda_EBA         | Shotgun/Illumina 2500          | 146021057   | 132174503  | 31814087   | 24.1        | 20058229             | 37          | 0.4      | 0.9612 (0.9434-0.9732)          |
| DA357     | Lokomotiv_EN       | Shotgun/Illumina 2500          | 116412845   | 106799820  | 32852067   | 30.8        | 19213306             | 41.5        | 0.4      | 0.9992 (0.9840-0.9998)          |
| DA358     | Kurma_EBA          | Shotgun/Illumina 2500          | 197490686   | 163807739  | 55746327   | 34          | 44528471             | 20.1        | 0.9      | 0.9996 (0.9924-0.9999)          |
| DA359     | Lokomotiv_EN       | Shotgun/Illumina 2500          | 94856162    | 86833551   | 50797883   | 58.5        | 35078164             | 30.9        | 0.7      | 0.9989 (0.9851-0.9998)          |
| DA360     | Kurma_EBA          | Shotgun/Illumina 2500          | 110520252   | 94120580   | 27668547   | 29.4        | 15883302             | 42.6        | 0.3      | 0.9985 (0.9848-0.9998)          |
| DA361     | UstIda_EBA         | Shotgun/Illumina 2500          | 168686829   | 141465106  | 49697236   | 35.1        | 28622309             | 42.4        | 0.6      | 0.9556 (0.9366-0.9680)          |
| DA362     | Shamanka_EN        | Shotgun/Illumina 2500          | 156194048   | 148324489  | 99610247   | 67.2        | 50570847             | 49.2        | 1.1      | 0.9953 (0.9872-0.9994)          |

**Table S1.**

Details of the sequence data generated in the present study including read number before and after filtering, extent of duplication, genomic coverage, sex, and contamination estimates.

| <i>Cemetery</i> | <i>EN</i> | <i>LN</i> | <i>EBA</i> | <i>Total</i> |
|-----------------|-----------|-----------|------------|--------------|
| Lokomotiv       | 4         |           |            | 4            |
| Shamanka II     | 10        |           | 6          | 16           |
| Ust'Ida         |           | 4         | 4          | 8            |
| Kurma           |           |           | 3          | 3            |
| Total           | 14        | 4         | 13         | 31           |

**Table S2.**

Summary of human tooth samples submitted for the analysis reported in the current paper.



| Newly sequenced samples                                          |                               |                              |                                    |                                            |             |
|------------------------------------------------------------------|-------------------------------|------------------------------|------------------------------------|--------------------------------------------|-------------|
| Population/<br>Sample Label                                      | Geographical<br>Range         | Period                       | Approximate time<br>before present | Subsistence                                | Sample size |
| SidelkinoEHG_ML                                                  | Eastern Europe                | Mesolithic                   | 11500–11000                        | Hunter-Gatherer                            | 1           |
| Botai_CA                                                         | Central Steppe                | Copper Age                   | 5500–5300                          | Hunter-Herder                              | 3           |
| YamnayaKaragash_EBA                                              | Central Steppe                | Early Bronze Age             | 4900                               | Pastoral                                   | 1           |
| CentralSteppe_EMB A                                              | Central Steppe                | Early/Middle Bronze Age      | 4200                               | Unknown/mixed<br>Mixed HG /<br>Pastoralist | 2           |
| Okunevo_EMBA                                                     | Minusinsk Basin               | Early/Middle Bronze Age      | 4500–4000                          | Pastoralist                                | 19          |
| Shamanka_EN                                                      | Cis-Baikal                    | Early Neolithic              | 7200–6200                          | Hunter-Gatherer                            | 12          |
| Lokomotiv_EN                                                     | Cis-Baikal                    | Early Neolithic              | 6700                               | Hunter-Gatherer                            | 4           |
| UstIda_LN                                                        | Cis-Baikal                    | Late Neolithic               | 5000                               | Hunter-Gatherer                            | 4           |
| Kurma_EBA                                                        | Cis-Baikal                    | Early Bronze Age             | 4200–4000                          | Hunter-Gatherer                            | 3           |
| Shamanka_EBA                                                     | Cis-Baikal                    | Early Bronze Age             | 4000–3800                          | Hunter-Gatherer                            | 4           |
| UstIda_EBA                                                       | Cis-Baikal                    | Early Bronze Age             | 4000–3800                          | Hunter-Gatherer                            | 4           |
| Namazga_CA                                                       | Turkmenistan                  | Copper Age                   | 5300–5200                          | Agriculture                                | 4           |
| Turkmenistan_IA                                                  | Turkmenistan                  | Iron Age                     | 2800                               | Agriculture                                | 1           |
| Anatolia_EBA                                                     | Central Anatolia              | Early Bronze Age             | 4200                               | Agriculture                                | 3           |
| Anatolia_MLBA                                                    | Central Anatolia              | Middle/Late Bronze Age       | 3600                               | Agriculture                                | 5           |
| Anatolia_IA                                                      | Central Anatolia              | Iron Age                     | 2600                               | Agriculture                                | 2           |
| Anatolia_Ottoman                                                 | Central Anatolia              | Late Medieval                | 500                                | Agriculture                                | 2           |
| Previously published samples mentioned throughout the manuscript |                               |                              |                                    |                                            |             |
| Population/Sample<br>Label                                       | Geographical<br>Range         | Period                       | Approximate time<br>before present | Subsistence                                | Reference   |
| MA1                                                              | Cis-Baikal                    | Paleolithic                  | 24423–23891                        | Hunter-Gatherer                            | (26)        |
| AG-2                                                             | south central Siberia         | Paleolithic                  | 17075–16750                        | Hunter-Gatherer                            | (26)        |
| AG-3                                                             | south central Siberia         | Paleolithic                  | 14710                              | Hunter-Gatherer                            | (27)        |
| CHG                                                              | Caucasus                      | Upper Paleolithic-Mesolithic | 13300–9700                         | Hunter-Gatherer                            | (7)         |
| Natufian                                                         | Levant                        | Epipaleolithic               | 13840–11760                        | Hunter-Gatherer                            | (42)        |
| EHG                                                              | Eastern Europe                | Mesolithic                   | 8850–7000                          | Hunter-Gatherer                            | (2, 47)     |
| Iran_N                                                           | Iran                          | Neolithic                    | 9950–9650                          | Hunter-Gatherer                            | (42)        |
| Steppe_EMBA                                                      | Eastern Europe/Altai          | Early /Middle Bronze Age     | 5000–4500*                         | Nomadic/Pastoral                           | (1, 2)      |
| Steppe_MLBA                                                      | Eastern Europe & Central Asia | Middle/Late Bronze Age       | 4500–3200                          | Nomadic/Pastoral                           | (1, 2)      |
| Xiongu_IA                                                        | Eastern Steppe                | Iron Age                     | 2300–1900                          | Nomadic/Pastoral                           | (3)         |
| Steppe_Eneolithic Armenian Copper Age                            | Western Steppe                | Copper Age                   | 7150–5950                          | Nomadic/Pastoral                           | (47)        |
| Devil's Gate                                                     | Armenia                       | Copper Age                   | 5397–5230                          | Agriculture                                | (42)        |
| Iran_ChI                                                         | East Asia                     | Copper Age                   | 7700                               | Hunter-Gatherer                            | (25)        |
| Anatolia_N                                                       | Iran                          | Copper Age                   | 5900–5040                          | Agriculture                                | (42)        |
| Anatolia_ChL                                                     | Anatolia                      | Neolithic                    | 8350–7550                          | Agriculture                                | (42)        |
| Iran LN                                                          | Anatolia                      | Copper Age                   | 5900–5700                          | Agriculture                                | (42)        |
| Ust-Ishim                                                        | Iran                          | Late Neolithic               | 6850                               | Agriculture                                | (42)        |
| BR2                                                              | Siberia                       | Paleolithic                  | 45000                              | Hunter-Gatherer                            | (128)       |
| Clovis                                                           | Hungary                       | Bronze Age                   | 3220–3060                          | Agriculture?/Mixed?                        | (139)       |
| Kennewick                                                        | Americas                      | Paleolithic                  | 13000–12600                        | Hunter-Gatherer                            | (137)       |
| Saqqaq                                                           | Americas                      | Paleolithic                  | 8340–9200                          | Hunter-Gatherer                            | (142)       |
|                                                                  |                               | Arctic Small Tool            | 4170–3600                          | Hunter-Gatherer                            | (138)       |

\* including two genetic outliers from the Middle Bronze Age

**Table S4.** Overview of population labels and population sizes of groups newly sequenced and of relevant published samples referred to throughout the manuscript.

| Individual 1 | Individual 2 | k0_ha | k1_hat | k2_ha | pi_HAT | Number of SNPs |
|--------------|--------------|-------|--------|-------|--------|----------------|
|              |              | t     |        | t     |        |                |
| DA336        | DA338        | 0.165 | 0.491  | 0.344 | 0.589  | 57548          |
| RISE515      | RISE673      | 0.362 | 0.319  | 0.319 | 0.478  | 18932          |
| DA379        | DA380        | 0.225 | 0.634  | 0.141 | 0.458  | 6711           |
| RISE516      | RISE672      | 0.365 | 0.451  | 0.185 | 0.41   | 129263         |
| DA334        | DA335        | 0.228 | 0.767  | 0.005 | 0.388  | 51785          |
| RISE671      | RISE673      | 0.537 | 0.32   | 0.143 | 0.303  | 11542          |
| DA340        | DA341        | 0.488 | 0.443  | 0.069 | 0.29   | 92418          |
| RISE515      | RISE671      | 0.738 | 0.01   | 0.252 | 0.257  | 40957          |
| RISE670      | RISE674      | 0.521 | 0.454  | 0.025 | 0.252  | 141703         |
| RISE662      | RISE664      | 0.539 | 0.432  | 0.029 | 0.245  | 134407         |
| DA353        | DA361        | 0.663 | 0.194  | 0.143 | 0.24   | 23917          |
| RISE515      | RISE516      | 0.573 | 0.392  | 0.035 | 0.231  | 92488          |
| RISE515      | RISE667      | 0.602 | 0.332  | 0.065 | 0.231  | 30717          |
| RISE515      | RISE672      | 0.608 | 0.335  | 0.057 | 0.224  | 96837          |
| RISE515      | RISE674      | 0.594 | 0.371  | 0.035 | 0.221  | 125410         |
| RISE672      | RISE673      | 0.751 | 0.077  | 0.172 | 0.211  | 26883          |
| RISE667      | RISE673      | 0.654 | 0.285  | 0.062 | 0.204  | 8577           |

**Table S5.**

Highest values obtained in the analysis of pairwise relatedness with LCMLKIN.

| Param                     | Inferred | 95% CI               | Bias     | SD      |
|---------------------------|----------|----------------------|----------|---------|
| $P_{\text{yamFromCHG}}$   | 0.54     | (0.30, 0.73)         | -0.03    | 0.11    |
| $T_{\text{admixYam}}$     | 4900.01  | (4900.01, 19057.78)  | 2744.71  | 4140.22 |
| $T_{\text{KK1-YamCHG}}$   | 26815.73 | (9825.75, 30891.50)  | -3273.67 | 5401.31 |
| $T_{\text{Sid-YamANE}}$   | 11240.14 | (11240.02, 19058.17) | 1166.89  | 2053.84 |
| $T_{\text{Botai-YamANE}}$ | 17140.53 | (11238.49, 22830.86) | -951.31  | 3071.72 |
| $T_{\text{Botai-KK1}}$    | 38133.78 | (33804.71, 41742.71) | -674.86  | 2056.11 |
| $N_{\text{Botai}}$        | 3666.05  | (1420.77, 5447.87)   | -363.32  | 1090.17 |
| $N_{\text{KK1}}$          | 1765.31  | (17.18, 2178.15)     | -289.48  | 535.25  |
| $N_{\text{Ancestral}}$    | 11404.65 | (11257.32, 11518.16) | -22.78   | 64.90   |
| $N_{\text{Eurasia}}$      | 3846.61  | (3573.90, 4570.13)   | 133.05   | 264.97  |

**Table S6.**

Point estimates for the model in Fig. S16, along with parametric bootstrap estimates of 95% confidence intervals, bias, and standard deviation.

| $X$              | Expected | Observed | Z-score |
|------------------|----------|----------|---------|
| KK1              | -0.209   | -0.197   | 0.644   |
| Ancestral Allele | -0.308   | -0.337   | -1.834  |

**Table S7.**

$f_4^*$ (Yamnaya, Sidelkino, Botai,  $X$ ) residuals for the model in Fig. S16. Z-scores were computed using a block-jackknife with 100 blocks.

| Param                        | Inferred  | 95% CI                 | Bias    | SD      |
|------------------------------|-----------|------------------------|---------|---------|
| $N_{\text{Mbuti}}$           | 23290.67  | (22464.22, 24119.81)   | 18.11   | 414.07  |
| $N_{\text{Steppe}}$          | 3563.47   | (2882.31, 4352.43)     | -8.47   | 363.63  |
| $N_{\text{Botai}}$           | 2741.21   | (1481.46, 3999.45)     | -212.05 | 614.33  |
| $N_{\text{Sholpan}}$         | 1267.10   | (958.19, 1607.68)      | 4.91    | 157.74  |
| $N_{\text{ANE}}$             | 2159.74   | (1866.16, 2335.58)     | -75.66  | 113.54  |
| $N_{\text{Han}}$             | 5793.64   | (5530.65, 6026.03)     | -24.73  | 130.35  |
| $N_{\text{Ancestral}}$       | 12464.47  | (12412.77, 12506.72)   | -1.38   | 24.13   |
| $N_{\text{Eurasia}}$         | 3683.89   | (3616.90, 3777.24)     | 10.45   | 45.70   |
| $T_{\text{Mbuti-Eurasia}}$   | 122513.04 | (121630.09, 123547.00) | 34.46   | 513.67  |
| $T_{\text{AEA-ANE}}$         | 48294.75  | (46577.94, 49632.08)   | -129.92 | 754.35  |
| $T_{\text{Han-ShamankaEN}}$  | 17486.66  | (16652.49, 18268.40)   | -40.27  | 390.92  |
| $T_{\text{MA1-GhostANE}}$    | 26580.47  | (25319.17, 29126.32)   | 591.97  | 896.66  |
| $T_{\text{Steppe-GhostANE}}$ | 12536.92  | (11607.70, 19220.01)   | 2174.32 | 1874.60 |
| $T_{\text{AEA->Steppe}}$     | 12535.30  | (10924.24, 13976.98)   | -119.99 | 813.02  |
| $P_{\text{AEA->Steppe}}$     | 0.51      | (0.49, 0.53)           | 0.00    | 0.01    |
| $T_{\text{Sholpan-Okunevo}}$ | 10545.15  | (9528.28, 11378.47)    | -101.47 | 490.01  |
| $T_{\text{Botai}}$           | 11358.50  | (8893.71, 12411.86)    | -735.59 | 905.34  |
| $P_{\text{GhostANE->Botai}}$ | 0.40      | (0.35, 0.43)           | -0.00   | 0.02    |

**Table S8.**

Point estimates for the model in Fig. S19, along with parametric bootstrap estimates of 95% confidence intervals, bias, and standard deviation.

| $X$             | Expected | Observed | Z-score |
|-----------------|----------|----------|---------|
| Mbuti           | -0.117   | -0.132   | -0.924  |
| Okunevo         | -0.054   | -0.130   | -5.585  |
| Sholpan         | -0.031   | -0.065   | -1.830  |
| MA1             | -0.063   | -0.074   | -0.663  |
| Han             | -0.124   | -0.132   | -0.463  |
| ShamankaEN      | -0.136   | -0.129   | 0.481   |
| KK1             | -0.182   | -0.200   | -0.855  |
| AncestralAllele | -0.128   | -0.152   | -1.482  |

**Table S9.**

$f_4^*$ (Yamnaya, Sidelkino, Botai,  $X$ ) residuals for the model in Fig. S20. Z-scores were computed using a block-jackknife with 100 blocks.

| Param                           | Inferred  | 95% CI                 | Bias    | SD      |
|---------------------------------|-----------|------------------------|---------|---------|
| $N_{\text{Mbuti}}$              | 22419.38  | (21720.85, 23040.01)   | 2.10    | 338.59  |
| $N_{\text{Steppe}}$             | 952.26    | (844.45, 1479.24)      | 134.37  | 168.25  |
| $N_{\text{Botai}}$              | 991.05    | (507.29, 2045.61)      | 56.91   | 364.35  |
| $N_{\text{Sholpan}}$            | 593.79    | (432.98, 886.85)       | 41.78   | 112.93  |
| $N_{\text{ANE}}$                | 2700.77   | (2555.46, 2890.90)     | 14.38   | 80.78   |
| $N_{\text{Han}}$                | 4852.23   | (4652.50, 5031.59)     | 11.83   | 93.47   |
| $N_{\text{Ancestral}}$          | 12442.81  | (12404.26, 12507.90)   | 10.32   | 26.28   |
| $T_{\text{Mbuti-Eurasia}}$      | 121290.98 | (120399.04, 122237.33) | 32.75   | 474.59  |
| $N_{\text{Eurasia}}$            | 4039.99   | (3961.31, 4109.05)     | -6.35   | 37.64   |
| $T_{\text{AEA-ANE}}$            | 42394.72  | (41573.03, 43443.26)   | 159.31  | 453.13  |
| $T_{\text{Han-ShamankaEN}}$     | 15250.68  | (14696.51, 16021.19)   | 88.97   | 321.32  |
| $T_{\text{MA1-GhostANE}}$       | 24000.02  | (24000.02, 24003.13)   | 6.79    | 63.62   |
| $T_{\text{Steppe-GhostANE}}$    | 7752.34   | (7000.21, 12526.69)    | 500.88  | 1284.48 |
| $T_{\text{AEA->Steppe}}$        | 7270.62   | (7000.01, 8223.71)     | 64.31   | 324.65  |
| $P_{\text{AEA->Steppe}}$        | 0.45      | (0.41, 0.45)           | -0.02   | 0.01    |
| $T_{\text{Sholpan-Okunevo}}$    | 6840.96   | (6521.14, 7794.35)     | 153.18  | 335.92  |
| $T_{\text{Botai}}$              | 7262.52   | (6757.08, 8126.88)     | 18.86   | 331.07  |
| $P_{\text{GhostANE->Botai}}$    | 0.49      | (0.41, 0.52)           | -0.03   | 0.03    |
| $T_{\text{Sidelkino-GhostANE}}$ | 16424.22  | (14904.99, 16997.49)   | -440.82 | 493.71  |
| $N_{\text{CHG}}$                | 5728.53   | (3011.24, 10964.63)    | 368.41  | 2110.17 |
| $T_{\text{CHG-ANE}}$            | 36010.93  | (35293.54, 36814.39)   | 53.88   | 384.89  |
| $P_{\text{Sidelkino->Yamnaya}}$ | 0.40      | (0.23, 0.57)           | -0.00   | 0.08    |
| $N_{\text{KK1}}$                | 1053.53   | (27.90, 1883.24)       | -23.60  | 490.27  |

|                                                 |          |                     |         |         |
|-------------------------------------------------|----------|---------------------|---------|---------|
| $T_{\text{KK1-YamnayaCHG}}$                     | 20032.10 | (9965.85, 28033.62) | -194.90 | 4803.73 |
| $P_{\text{Yamnaya} \rightarrow \text{Okunevo}}$ | 0.16     | (0.09, 0.14)        | -0.05   | 0.01    |

**Table S10.**

Estimated parameters for the final model in Fig. S21, along with parametric bootstrap estimates of 95% confidence intervals, bias, and standard deviation.

| X               | Expected | Observed | Z-score |
|-----------------|----------|----------|---------|
| Mbuti           | -0.148   | -0.132   | 1.060   |
| Okunevo         | -0.112   | -0.130   | -1.349  |
| Sholpan         | -0.046   | -0.065   | -1.009  |
| MA1             | -0.059   | -0.074   | -0.868  |
| Han             | -0.156   | -0.132   | 1.399   |
| ShamankaEN      | -0.169   | -0.129   | 2.702   |
| KK1             | -0.230   | -0.200   | 1.488   |
| AncestralAllele | -0.159   | -0.152   | 0.445   |

**Table S11.**

$f_4^*$ (Yamnaya, Sidelkino, Botai, X) residuals for the model in Fig. S21. Z-scores were computed using a block-jackknife with 100 blocks.

| Target      | Source 1  | Source 2 | Source 3 | tandard Error | tandard Error | tandard Error | P-value |
|-------------|-----------|----------|----------|---------------|---------------|---------------|---------|
| Steppe_EMBA | EHG       | CHG      | Botai_CA | 0.04          | 0.04          |               | 0.12    |
|             | 0.53      | 0.47     |          |               |               |               |         |
| Steppe_EMBA | EHG       | CHG      | -0.03    | 0.07          | 0.04          | -0.03         | 0.06    |
|             | 0.55      | 0.48     |          |               |               |               |         |
| Baikal_LNBA | Baikal_EN | MA1      |          | 0.03          | 0.03          |               | 0.32    |
|             | 0.92      | 0.08     |          |               |               |               |         |

**Table S12.** qpAdm results calculated using 6 outgroups (Mbuti.DG, Ust\_Ishim, Clovis, Kostenki14, Switzerland\_HG, and Natufian), modeling Steppe\_EMBA and Baikal\_LNBA.



| Population      | SampleID             | ObservedSN | Representat | Lineage    |
|-----------------|----------------------|------------|-------------|------------|
| Botai_CA        | BOT15                | N-M231     | N-M231      | N          |
| Botai_CA        | BOT14                | R-M478     | R-M478      | R1b1a1     |
| Kurma_EBA       | DA354                | Q-M1083    | Q-L472      | Q1a        |
| Lokomotiv_EN    | DA357                | C-F4015    | C-F4015     | C2b1a1     |
| Lokomotiv_EN    | DA359                | N-M2087.1  | N-M2087.1   | N1c        |
| Okunevo_EMBA    | RISE673              | Q-M1100    | Q-L472      | Q1a        |
| Okunevo_EMBA    | RISE683              | Q-L712     | Q-L712      | Q1a1b1     |
| Okunevo_EMBA    | RISE672              | Q-M346     | Q-M346      | Q1a2       |
| Okunevo_EMBA    | RISE674              | Q-M346     | Q-M346      | Q1a2       |
| Okunevo_EMBA    | RISE662              | Q-L54      | Q-L54       | Q1a2a1     |
| Okunevo_EMBA    | RISE664              | Q-L330     | Q-L330      | Q1a2a1c    |
| Okunevo_EMBA    | RISE718              | Q-L330     | Q-L330      | Q1a2a1c    |
| Okunevo_EMBA    | RISE719              | Q-L334     | Q-L330      | Q1a2a1c    |
| Okunevo_EMBA    | RISE670              | Q-L940     | Q-L940      | Q1a2b      |
| Okunevo_EMBA    | RISE675              | R-Z2105    | R-Z2015     | R1b1a2a2   |
| Shamanka_EBA    | DA334                | Q-L55      | Q-L53       | Q1a2a      |
| Shamanka_EBA    | DA335                | Q-L53      | Q-L53       | Q1a2a      |
| Shamanka_EBA    | DA336                | Q-L53      | Q-L53       | Q1a2a      |
| Shamanka_EBA    | DA337                | Q-L475     | Q-L53       | Q1a2a      |
| Shamanka_EBA    | DA338                | Q-L53      | Q-L53       | Q1a2a      |
| Shamanka_EBA    | DA339                | Q-L334     | Q-L330      | Q1a2a1c    |
| Shamanka_EN     | DA247                | N-M231     | N-M231      | N          |
| Shamanka_EN     | DA251                | N-M2291    | N-M2291     | N1         |
| Shamanka_EN     | DA245                | N-L666     | N-L666      | N1c2       |
| Shamanka_EN     | DA248                | N-L666     | N-L666      | N1c2       |
| Shamanka_EN     | DA362                | N-L666     | N-L666      | N1c2       |
| Shamanka_EN     | DA250                | NO-M214    | NO-M214     | NO1        |
| UstIda_EBA      | DA361                | Q-M346     | Q-M346      | Q1a2       |
| UstIda_EBA      | DA353                | Q-L476     | Q-L53       | Q1a2a      |
| UstIda_EBA      | DA356                | Q-L213     | Q-L53       | Q1a2a      |
| UstIda_EBA      | DA343                | Q-L54      | Q-L54       | Q1a2a1     |
| UstIda_LN       | DA345                | N-M2080    | N-M46       | N1c1       |
| UstIda_LN       | DA355                | Q-L892     | Q-M346      | Q1a2       |
| Yamnaya         | YamnayaKaragash_EMBA | R-CTS1843  | R-CTS1843   | R1b1a2a2c1 |
| Turkmenistan_IA | DA382                | R-F992     | R-F992      | R1a1a1b2   |
| Namazga_CA      | DA379                | J-L134     | J-M304      | J          |
| Namazga_CA      | DA381                | J-L26      | J-L26       | J2a1       |
| Anatolia_EBA    | MA2212               | J-L559     | J-M410      | J2a        |
| Anatolia_MLBA   | MA2200               | J-L26      | J-L26       | J2a1       |
| Anatolia_MLBA   | MA2205               | J-L27      | J-L26       | J2a1       |
| Anatolia_MLBA   | MA2208               | G-M3317    | G-M406      | G2a2b1     |

**Table S13.**

Y-chromosome lineages identified in 41 ancient males from the present study. Observed SNP is the marker for which at least 1 derived allele was identified in the data. Representative SNP is the marker that is deemed representative of the Observed SNP and may not have been directly genotyped.

| Group              | SampleID | Haplogroup  | Quality | Group               | SampleID  | Haplogroup  | Quality |
|--------------------|----------|-------------|---------|---------------------|-----------|-------------|---------|
| Anatolia_EBA       | MA2210   | H           | 0.6623  | Okunevo_EMBA        | RISE675   | D4+195      | 0.8728  |
| Anatolia_EBA       | MA2212   | W5          | 0.7906  | Okunevo_EMBA        | RISE677   | A8a1        | 0.808   |
| Anatolia_EBA       | MA2213   | J1c10a      | 0.9048  | Okunevo_EMBA        | RISE680   | A+152+16362 | 0.8055  |
| Anatolia_IA        | MA2197   | U8b1b2      | 0.57    | Okunevo_EMBA        | RISE681   | A8a1        | 0.8748  |
| Anatolia_MLBA      | MA2200   | K1a+150     | 0.834   | Okunevo_EMBA        | RISE683   | H15b1       | 0.7518  |
| Anatolia_MLBA      | MA2203   | J1c         | 0.8591  | Okunevo_EMBA        | RISE684   | C5c         | 0.8222  |
| Anatolia_MLBA      | MA2205   | J2b1        | 0.7712  | Okunevo_EMBA        | RISE685   | C5c         | 0.9046  |
| Anatolia_MLBA      | MA2206   | U1a         | 0.8627  | Okunevo_EMBA        | RISE718   | C5c         | 0.8503  |
| Anatolia_MLBA      | MA2208   | H6a1b2e     | 0.5296  | Okunevo_EMBA        | RISE719   | C5c         | 0.8824  |
| Anatolian_Ottoman  | MA2195   | D4j         | 0.8464  | Shamanka_EBA        | DA334     | C4a2a1      | 0.8686  |
| Anatolian_Ottoman  | MA2196   | K           | 0.7099  | Shamanka_EBA        | DA335     | F1b1b       | 0.877   |
| Botai_CA           | BOT14    | K1b2        | 0.9639  | Shamanka_EBA        | DA336     | C4a2a1      | 0.8877  |
| Botai_CA           | BOT15    | R1b1        | 0.9265  | Shamanka_EBA        | DA337     | C4a1a3      | 0.9003  |
| Botai_CA           | BOT2016  | Z1a         | 0.9412  | Shamanka_EBA        | DA338     | C4a2a1      | 0.9011  |
| CentralSteppe_EMBA | EBA1     | C4+152      | 0.9078  | Shamanka_EBA        | DA339     | G2a1        | 0.8659  |
| CentralSteppe_EMBA | EBA2     | C4a1a4a     | 0.9483  | Shamanka_EN         | DA245     | G2a1        | 0.8493  |
| Kurma_EBA          | DA354    | D4          | 0.6069  | Shamanka_EN         | DA246     | D4e1        | 0.9434  |
| Kurma_EBA          | DA358    | F1b         | 0.8391  | Shamanka_EN         | DA247     | C4          | 0.884   |
| Kurma_EBA          | DA360    | F1b         | 0.791   | Shamanka_EN         | DA248     | C4          | 0.9122  |
| Lokomotiv_EN       | DA340    | D4          | 0.8631  | Shamanka_EN         | DA249     | C4          | 0.8622  |
| Lokomotiv_EN       | DA341    | D4j         | 0.9006  | Shamanka_EN         | DA250     | G2a1        | 0.8354  |
| Lokomotiv_EN       | DA357    | A+152+16362 | 0.7649  | Shamanka_EN         | DA251     | D4j         | 0.8919  |
| Lokomotiv_EN       | DA359    | D4+195      | 0.8569  | Shamanka_EN         | DA252     | G2a1        | 0.8709  |
| Namazga_CA         | DA380    | U2b         | 0.6851  | Shamanka_EN         | DA253     | F1b1+@152   | 0.9005  |
| Namazga_CA         | DA381    | J1+16193    | 0.8103  | Shamanka_EN         | DA362     | D4e1        | 0.921   |
| Namazga_CA         | DA383    | W3a2        | 0.7657  | SidelkinoEHG_ML     | Sidelkino | U5a2        | 0.8538  |
| Okunevo_EMBA       | RISE515  | A8a         | 0.7831  | Turkmenistan_IA     | DA382     | T2c1a       | 0.7975  |
| Okunevo_EMBA       | RISE516  | H6a1b       | 0.9117  | UstIda_EBA          | DA343     | D4j4        | 0.9308  |
| Okunevo_EMBA       | RISE662  | H6a         | 0.8019  | UstIda_EBA          | DA353     | H2a2a       | 0.6306  |
| Okunevo_EMBA       | RISE664  | A8a1        | 0.8254  | UstIda_EBA          | DA356     | C4a1a3      | 0.892   |
| Okunevo_EMBA       | RISE667  | A8a         | 0.7565  | UstIda_EBA          | DA361     | C4a1a3      | 0.8999  |
| Okunevo_EMBA       | RISE670  | A8a         | 0.7831  | UstIda_LN           | DA342     | R1b1        | 0.787   |
| Okunevo_EMBA       | RISE671  | H6a1b       | 0.8647  | UstIda_LN           | DA344     | A+152+16362 | 0.7901  |
| Okunevo_EMBA       | RISE672  | H6a1b       | 0.8647  | UstIda_LN           | DA345     | D4j         | 0.8996  |
| Okunevo_EMBA       | RISE673  | A8a         | 0.7316  | UstIda_LN           | DA355     | A2          | 0.8086  |
| Okunevo_EMBA       | RISE674  | A+152+16362 | 0.7954  | YamnayaKaragash_EBA | Yamnaya   | R1a1a       | 0.9641  |

**Table S15.** Mitochondrial DNA lineages identified in 74 ancient samples sequenced in the present study with Haplogrep.

| Model                          | nSNPs  | <i>p</i> -value Rank = 0<br>(1 stream) | <i>p</i> -value Rank = 1<br>(2 streams) | <i>p</i> -value Rank = 2<br>(3 streams) |
|--------------------------------|--------|----------------------------------------|-----------------------------------------|-----------------------------------------|
| Namazga+Onge                   | 83533  | 4.89E-35                               | 1                                       | -                                       |
| SteppeMLBA+Onge                | 87093  | 2.08E-169                              | 1                                       | -                                       |
| Namazga+Xiongnu                | 108875 | 5.16E-58                               | 1                                       | -                                       |
| Xiongnu+Onge                   | 102064 | 8.46E-37                               | 1                                       | -                                       |
| ZarafshanIA+Xiongnu            | 107624 | 1.24E-42                               | 1                                       | -                                       |
| IranN+Xiongnu                  | 111478 | 1.36E-51                               | 1                                       | -                                       |
| IranN+SteppeEMBA               | 78724  | 2.51E-35                               | 1                                       | -                                       |
| IranN+CHG                      | 127395 | 0.00011                                | 1                                       | -                                       |
| IranN+EHG                      | 121110 | 2.93E-65                               | 1                                       | -                                       |
| Namazga+Paniya                 | 69112  | 2.96E-25                               | 1                                       | -                                       |
| Namazga+Onge+SteppeMLBA        | 68094  | 1.97E-152                              | 3.28E-08                                | 1                                       |
| Namazga+Onge+Xiongnu           | 76376  | 4.56E-76                               | 2.56E-20                                | 1                                       |
| Namazga+Xiongnu +SteppeMLBA    | 74198  | 3.18E-169                              | 1.16E-12                                | 1                                       |
| IranN+SteppeEMBA+Onge          | 70986  | 7.14E-168                              | 4.86E-15                                | 1                                       |
| IranN+Xiongnu+SteppeMLBA       | 78041  | 1.10E-184                              | 5.62E-20                                | 1                                       |
| ZarafshanIA+Xiongnu+SteppeMLBA | 72211  | 4.82E-150                              | 0.008                                   | 1                                       |
| IranN+SteppeMLBA+Onge          | 73290  | 7.42E-175                              | 3.25E-10                                | 1                                       |
| IranN+EHG+Onge                 | 79549  | 2.74E-143                              | 1.78E-20                                | 1                                       |
| IranN+CHG+Onge                 | 82839  | 3.82E-49                               | 0.00026                                 | 1                                       |
| EHG+CHG+IranN                  | 101164 | 3.70E-76                               | 0.018                                   | 1                                       |
| Namazga+Paniya+SteppeMLBA      | 63333  | 2.02E-146                              | 1.95E-07                                | 1                                       |

**Table S16.**

qpWave results for assessing outgroup informativeness in qpAdm models using all sites. For each of the models that we tested in qpAdm, we used qpWave to assess whether the ancestries of the source populations could be modeled as independent streams of migration from a set of seven outgroups (Ust\_Ishim, Anzick1, Kostenki14, Switzerland\_HG, Natufian, Mal'ta). In the table, we show the number of SNPs used for each comparison (nSNPs) and qpWave *p*-values for the tests for 1, 2, and 3 streams of migration. For this test, we rejected the null hypotheses in each column (number of streams), when we observed  $p < 0.05$ .

| Model                              | nSNPs | <i>p</i> -value Rank=0<br>(1 stream) | <i>p</i> -value Rank=1<br>(2 streams) | <i>p</i> -value Rank=2<br>(3 streams) |
|------------------------------------|-------|--------------------------------------|---------------------------------------|---------------------------------------|
| Namazga+Onge                       | 14855 | 8.74E-10                             | 1                                     | -                                     |
| SteppeMLBA+Onge                    | 15592 | 4.28E-49                             | 1                                     | -                                     |
| Namazga+Xiongnu                    | 19871 | 7.57E-13                             | 1                                     | -                                     |
| Xiongnu+Onge                       | 18475 | 9.80E-10                             | 1                                     | -                                     |
| TurkmenistanIA+Xiongnu             | 19688 | 5.58E-13                             | 1                                     | -                                     |
| IranN+Xiongnu                      | 20084 | 1.02E-13                             | 1                                     | -                                     |
| IranN+SteppeEMBA                   | 14038 | 1.21E-08                             | 1                                     | -                                     |
| IranN+CHG                          | 22789 | 0.0083                               | 1                                     | -                                     |
| IranN+EHG                          | 21605 | 7.45E-17                             | 1                                     | -                                     |
| Namazga+Paniya                     | 12197 | 6.65E-07                             | 1                                     | -                                     |
| Namazga+Onge+SteppeMLBA            | 12072 | 1.30E-42                             | 1.76E-01                              | 1                                     |
| Namazga+Onge+Xiongnu               | 13681 | 1.25E-18                             | 1.40E-07                              | 1                                     |
| Namazga+Xiongnu+SteppeMLBA         | 13425 | 2.30E-39                             | 7.01E-02                              | 1                                     |
| IranN+SteppeEMBA+Onge              | 12510 | 1.51E-40                             | 1.54E-05                              | 1                                     |
| IranN+Xiongnu+SteppeMLBA           | 13997 | 5.65E-46                             | 9.40E-07                              | 1                                     |
| Turkmenistan_IA+Xiongnu+SteppeMLBA | 13073 | 1.52E-32                             | 0.542058833                           | 1                                     |
| IranN+SteppeMLBA+Onge              | 12919 | 1.45E-44                             | 1.62E-04                              | 1                                     |
| IranN+EHG+Onge                     | 14016 | 1.52E-36                             | 1.57E-07                              | 1                                     |
| IranN+CHG+Onge                     | 14631 | 1.17E-13                             | 0.00680204                            | 1                                     |
| EHG+CHG+IranN                      | 18044 | 7.10E-18                             | 0.045000504                           | 1                                     |
| Namazga+Paniya+SteppeMLBA          | 11185 | 1.67E-41                             | 1.32E-01                              | 1                                     |

**Table S17.**

qpWave results for assessing outgroup informativeness in qpAdm models using transversion polymorphisms only. This table is similar to Table S5, but only transversion polymorphisms were used in each test. While this table recapitulates the general trends in Table S5, we observed some inconsistencies in the *p*-values for some tests. We interpret these as reduced statistical power in the dataset where transition polymorphisms were excluded.

## **Table captions for separate tables**

### **Table S3.**

Information for the samples and archaeological sites analysed in the present-study.

Detailed information of radiocarbon dating, archaeological context, isotopes, and geographical location associated to the sites and samples here analyzed.

### **Table S14.**

Ancestral and derived SNP count supporting Y-chromosome lineage determination.

We present the number of markers which informed Y-chromosome haplogroup determination in our male samples.

## References

1. M. E. Allentoft, M. Sikora, K.-G. Sjögren, S. Rasmussen, M. Rasmussen, J. Stenderup, P. B. Damgaard, H. Schroeder, T. Ahlström, L. Vinner, A. S. Malaspinas, A. Margaryan, T. Higham, D. Chivall, N. Lynnerup, L. Harvig, J. Baron, P. Della Casa, P. Dąbrowski, P. R. Duffy, A. V. Ebel, A. Epimakhov, K. Frei, M. Furmanek, T. Gralak, A. Gromov, S. Gronkiewicz, G. Grupe, T. Hajdu, R. Jarysz, V. Khartanovich, A. Khokhlov, V. Kiss, J. Kolář, A. Kriiska, I. Lasak, C. Longhi, G. McGlynn, A. Merkevcicius, I. Merkyte, M. Metspalu, R. Mkrtchyan, V. Moiseyev, L. Paja, G. Pálfi, D. Pokutta, Ł. Pospieszny, T. D. Price, L. Saag, M. Sablin, N. Shishlina, V. Smrčka, V. I. Soenov, V. Szeverényi, G. Tóth, S. V. Trifanova, L. Varul, M. Vicze, L. Yepiskoposyan, V. Zhitenev, L. Orlando, T. Sicheritz-Pontén, S. Brunak, R. Nielsen, K. Kristiansen, E. Willerslev, Population genomics of bronze age Eurasia. *Nature* **522**, 167–172 (2015). [doi:10.1038/nature14507](https://doi.org/10.1038/nature14507)
2. W. Haak, I. Lazaridis, N. Patterson, N. Rohland, S. Mallick, B. Llamas, G. Brandt, S. Nordenfelt, E. Harney, K. Stewardson, Q. Fu, A. Mittnik, E. Bánffy, C. Economou, M. Francken, S. Friederich, R. G. Pena, F. Hallgren, V. Khartanovich, A. Khokhlov, M. Kunst, P. Kuznetsov, H. Meller, O. Mochalov, V. Moiseyev, N. Nicklisch, S. L. Pichler, R. Risch, M. A. Rojo Guerra, C. Roth, A. Szécsényi-Nagy, J. Wahl, M. Meyer, J. Krause, D. Brown, D. Anthony, A. Cooper, K. W. Alt, D. Reich, Massive migration from the steppe was a source for Indo-European languages in Europe. *Nature* **522**, 207–211 (2015). [doi:10.1038/nature14317](https://doi.org/10.1038/nature14317)
3. P. B. Damgaard, N. Marchi, S. Rasmussen, M. Peyrot, G. Renaud, Th. Korneliussen, J. V. Moreno-Mayar, M. W. Pedersen, A. Goldberg, E. Usmanova, N. Baimukhanov, V. Loman, L. Hedeager, A. G. Pedersen, K. Nielsen, G. Afanasiev, K. Akmatov, A. Aldashev, A. Alpaslan, G. Baimbetov, V. I. Bazaliiskii, A. Beisenov, B. Boldbaatar, B. Boldgiv, C. Dorzhu, S. Ellingvag, D. Erdenebaatar, R. Dajani, E. Dmitriev, V. Evdokimov, K. M. Frei, A. Gromov, A. Goryachev, H. Hakonarson, T. Hegay, Z. Khachatryan, R. Khashkhanov, E. Kitov, A. Kolbina, T. Kubatbek, A. Kukushkin, I. Kukushkin, N. Lau, A. Margaryan, I. Merkyte, I. V. Mertz, V. K. Mertz, E. Mijiddorj, V. Moiyesev, G. Mukhtarova, B. Nurmukhanbetov, Zh. Orozbekova, I. Panyushkina, K. Pieta, V. Smrčka, I. Shevnina, A. Logvin, K.-G. Sjögren, T. Štolcová, K. Tashbaeva, A. Tkachev, T. Tulegenov, D. Voyakin, L. Yepiskoposyan, S. Undrakhbold, V. Varfolomeev, A. Weber, N. Kradin, M. E. Allentoft, L. Orlando, R. Nielsen, M. Sikora, E. Heyer, K. Kristiansen, E. Willerslev, 137 ancient human genomes from across the Eurasian steppe. *Nature* 10.1038/s41586-018-0094-2 (2018).
4. D. W. Anthony, *The Horse, the Wheel, and Language: How Bronze-Age Riders from the Eurasian Steppes Shaped the Modern World* (Princeton Univ. Press, 2010).
5. A. K. Outram, in *The Oxford Handbook of the Archaeology and Anthropology of Hunter-Gatherers*, V. Cummings, P. Jordan, M. Zvelebil, Eds. (Oxford Univ. Press, Oxford, 2014), pp. 749–766.
6. J. P. Mallory, *In Search of the Indo-Europeans: Language, Archaeology and Myth* (Thames & Hudson, London, 1989).
7. E. R. Jones, G. Gonzalez-Fortes, S. Connell, V. Siska, A. Eriksson, R. Martiniano, R. L. McLaughlin, M. Gallego Llorente, L. M. Cassidy, C. Gamba, T. Meshveliani, O. Bar-

- Yosef, W. Müller, A. Belfer-Cohen, Z. Matskevich, N. Jakeli, T. F. G. Higham, M. Currat, D. Lordkipanidze, M. Hofreiter, A. Manica, R. Pinhasi, D. G. Bradley, Upper Palaeolithic genomes reveal deep roots of modern Eurasians. *Nat. Commun.* **6**, 8912 (2015). [doi:10.1038/ncomms9912](https://doi.org/10.1038/ncomms9912)
8. J. P. Mallory, D. Q. Adams, *The Oxford introduction to Proto-Indo-European and the Proto-Indo-European world* (Oxford Univ. Press, Oxford, 2006).
  9. K. Kristiansen, M. E. Allentoft, K. M. Frei, R. Iversen, N. N. Johannsen, G. Kroonen, Ł. Pospieszny, T. D. Price, S. Rasmussen, K.-G. Sjögren, M. Sikora, E. Willerslev, Re-theorising mobility and the formation of culture and language among the Corded Ware Culture in Europe. *Antiquity* **91**, 334–347 (2017). [doi:10.15184/aqy.2017.17](https://doi.org/10.15184/aqy.2017.17)
  10. A. K. Outram, N. A. Stear, R. Bendrey, S. Olsen, A. Kasparov, V. Zaibert, N. Thorpe, R. P. Evershed, The earliest horse harnessing and milking. *Science* **323**, 1332–1335 (2009). [doi:10.1126/science.1168594](https://doi.org/10.1126/science.1168594)
  11. E. Kaiser, Der Übergang zur Rinderzucht im nördlichen Schwarzmeerraum. *Godišnjak Centar za Balkanološka Ispitivanja* **39**, 23–34 (2010).
  12. D. Reich, K. Thangaraj, N. Patterson, A. L. Price, L. Singh, Reconstructing Indian population history. *Nature* **461**, 489–494 (2009). [doi:10.1038/nature08365](https://doi.org/10.1038/nature08365)
  13. K. Kristiansen, *Europe Before History* (Cambridge Univ. Press, Cambridge, 1998).
  14. See the supplementary materials.
  15. A. K. Outram, A. Polyakov, A. Gromov, V. Moiseyev, A. W. Weber, V. I. Bazaliiskii, O. I. Goriunova, Supplementary discussion of the archaeology of Central Asian and East Asian Neolithic to Bronze Age hunter-gatherers and early pastoralists, including consideration of horse domestication. [10.5281/zenodo.1240521](https://doi.org/10.5281/zenodo.1240521) (9 May 2018).
  16. V. V. Evdokimov, V. G. Loman, Raskopki yamnogo kurgana v Karagandinskoj oblasti, in *Voprosy Arheologii Central'nogo i Severnogo Kazakhstana* (Karaganda, 1989), pp. 34–46.
  17. D. W. Anthony, D. R. Brown, The secondary products revolution, horse-riding, and mounted warfare. *J. World Prehist.* **24**, 131–160 (2011). [doi:10.1007/s10963-011-9051-9](https://doi.org/10.1007/s10963-011-9051-9)
  18. V. I. Bazaliiskii, in *Prehistoric Foragers of the Cis-Baikal, Siberia*, A. Weber, H. McKenzie, Eds. (Northern Hunter-Gatherers Research Series, Canadian Circumpolar Institute Press, Edmonton, 2003), vol. 1.
  19. V. I. Bazaliiskii, in *Prehistoric Hunter-Gatherers of the Baikal Region, Siberia: Bioarchaeological Studies of Past Life Ways*, A. Weber, M. A. Katzenberg, T. G. Schurr, Eds. (University of Pennsylvania Press, Philadelphia, 2010).
  20. A. Weber, Social evolution among neolithic and early bronze age foragers in the Lake Baikal region: New light on old models. *Arctic Anthropol.* **31**, 1–15 (1994).
  21. A. Weber, The Neolithic and Early Bronze Age of the Lake Baikal Region: A review of recent research. *J. World Prehist.* **9**, 99–165 (1995). [doi:10.1007/BF02221004](https://doi.org/10.1007/BF02221004)
  22. A. Weber, V. I. Bazaliiskii, Mortuary practices and social relations among the Neolithic foragers of the Angara and Lake Baikal region: retrospection and prospection, in *Debating complexity: proceedings of the 26th annual conference of the Archaeological*



- Association of the University of Calgary*, D. A. Meyer, P. C. Dawson, D. T. Hanna, Eds. (University of Calgary, Calgary 1003), pp. 97– 103.
23. V. F. Zaibert, *Botaiskaya Kultura* (KazAkparat, Almaty, 2009).
24. S. V. Svyatko, J. P. Mallory, E. M. Murphy, A. V. Polyakov, P. J. Reimer, R. J. Schulting, New radiocarbon dates and a review of the chronology of prehistoric populations from the Minusinsk basin, southern Siberia, Russia. *Radiocarbon* **51**, 243–273 (2009). doi:10.1017/S0033822200033798
25. V. Siska, E. R. Jones, S. Jeon, Y. Bhak, H.-M. Kim, Y. S. Cho, H. Kim, K. Lee, E. Veselovskaya, T. Balueva, M. Gallego-Llorente, M. Hofreiter, D. G. Bradley, A. Eriksson, R. Pinhasi, J. Bhak, A. Manica, Genome-wide data from two early Neolithic East Asian individuals dating to 7700 years ago. *Sci. Adv.* **3**, e1601877 (2017). doi:10.1126/sciadv.1601877
26. M. Raghavan, P. Skoglund, K. E. Graf, M. Metspalu, A. Albrechtsen, I. Moltke, S. Rasmussen, T. W. Stafford Jr., L. Orlando, E. Metspalu, M. Karmin, K. Tambets, S. Rootsi, R. Mägi, P. F. Campos, E. Balanovska, O. Balanovsky, E. Khusnutdinova, S. Litvinov, L. P. Osipova, S. A. Fedorova, M. I. Voevoda, M. DeGiorgio, T. Sicheritz-Ponten, S. Brunak, S. Demeshchenko, T. Kivisild, R. Villems, R. Nielsen, M. Jakobsson, E. Willerslev, Upper Palaeolithic Siberian genome reveals dual ancestry of Native Americans. *Nature* **505**, 87–91 (2014). doi:10.1038/nature12736
27. Q. Fu, C. Posth, M. Hajdinjak, M. Petr, S. Mallick, D. Fernandes, A. Furtwängler, W. Haak, M. Meyer, A. Mittnik, B. Nickel, A. Peltzer, N. Rohland, V. Slon, S. Talamo, I. Lazaridis, M. Lipson, I. Mathieson, S. Schiffels, P. Skoglund, A. P. Derevianko, N. Drozdov, V. Slavinsky, A. Tsybankov, R. G. Cremonesi, F. Mallegni, B. Gély, E. Vacca, M. R. G. Morales, L. G. Straus, C. Neugebauer-Maresch, M. Teschler-Nicola, S. Constantin, O. T. Moldovan, S. Benazzi, M. Peresani, D. Coppola, M. Lari, S. Ricci, A. Ronchitelli, F. Valentin, C. Thevenet, K. Wehrberger, D. Grigorescu, H. Rougier, I. Crevecoeur, D. Flas, P. Semal, M. A. Mannino, C. Cupillard, H. Bocherens, N. J. Conard, K. Harvati, V. Moiseyev, D. G. Drucker, J. Svoboda, M. P. Richards, D. Caramelli, R. Pinhasi, J. Kelso, N. Patterson, J. Krause, S. Pääbo, D. Reich, The genetic history of Ice Age Europe. *Nature* **534**, 200–205 (2016). doi:10.1038/nature17993
28. J. A. Kamm, J. Terhorst, Y. S. Song, Efficient computation of the joint sample frequency spectra for multiple populations. *J. Comput. Graph. Stat.* **26**, 182–194 (2017). doi:10.1080/10618600.2016.1159212
29. A.-M. Ilumäe, M. Reidla, M. Chukhryaeva, M. Järve, H. Post, M. Karmin, L. Saag, A. Agdzhoyan, A. Kushniarevich, S. Litvinov, N. Ekomasova, K. Tambets, E. Metspalu, R. Khusainova, B. Yunusbayev, E. K. Khusnutdinova, L. P. Osipova, S. Fedorova, O. Utevska, S. Koshel, E. Balanovska, D. M. Behar, O. Balanovsky, T. Kivisild, P. A. Underhill, R. Villems, S. Rootsi, Human Y Chromosome Haplogroup N: A Non-trivial Time-Resolved Phylogeography that Cuts across Language Families. *Am. J. Hum. Genet.* **99**, 163–173 (2016). doi:10.1016/j.ajhg.2016.05.025
30. V. T. Kovaleva, N. M. Chairkina, “Etnokul’turnye i etnogeneticheskie protsessy v severnem zaurale v kontse kamennogo–nachale bronzovogo veka: Itogi i problemy issledovaniya”

- in *Voprosy arkheologii Urala* (Uralskii gosudarstvenyi universitet, Ekaterinburg, 1991), pp. 45–70.
31. D. W. Anthony, D. R. Brown, The secondary products revolution, horse-riding, and mounted warfare. *J. World Prehist.* **24**, 131–160 (2011). doi:10.1007/s10963-011-9051-9
  32. C. Gaunitz, A. Fages, K. Hanghøj, A. Albrechtsen, N. Khan, M. Schubert, A. Seguin-Orlando, I. J. Owens, S. Felkel, O. Bignon-Lau, P. de Barros Damgaard, A. Mittnik, A. F. Mohaseb, H. Davoudi, S. Alquraishi, A. H. Alfarhan, K. A. S. Al-Rasheid, E. Crubézy, N. Benecke, S. Olsen, D. Brown, D. Anthony, K. Massy, V. Pitulko, A. Kasparov, G. Brem, M. Hofreiter, G. Mukhtarova, N. Baimukhanov, L. Lõugas, V. Onar, P. W. Stockhammer, J. Krause, B. Boldgiv, S. Undrakhbold, D. Erdenebaatar, S. Lepetz, M. Mashkour, A. Ludwig, B. Wallner, V. Merz, I. Merz, V. Zaibert, E. Willerslev, P. Librado, A. K. Outram, L. Orlando, Ancient genomes revisit the ancestry of domestic and Przewalski's horses. *Science* **360**, 111–114 (2018). doi:10.1126/science.aao3297
  33. S. L. Olsen, S. Grant, A. M. Choyke, L. Bartosiewicz, *Horses and Humans: the Evolution of Human-Equine Relationships* (British Archeological Reports, Oxford, 2006).
  34. N. M. Myres, S. Rootsi, A. A. Lin, M. Järve, R. J. King, I. Kutuev, V. M. Cabrera, E. K. Khusnutdinova, A. Pshenichnov, B. Yunusbayev, O. Balanovsky, E. Balanovska, P. Rudan, M. Baldovic, R. J. Herrera, J. Chirani, J. Di Cristofaro, R. Villems, T. Kivisild, P. A. Underhill, A major Y-chromosome haplogroup R1b Holocene era founder effect in Central and Western Europe. *Eur. J. Hum. Genet.* **19**, 95–101 (2011). doi:10.1038/ejhg.2010.146
  35. D. J. Lawson, G. Hellenthal, S. Myers, D. Falush, Inference of population structure using dense haplotype data. *PLOS Genet.* **8**, e1002453 (2012). doi:10.1371/journal.pgen.1002453
  36. S. Schiffels, W. Haak, P. Paajanen, B. Llamas, E. Popescu, L. Loe, R. Clarke, A. Lyons, R. Mortimer, D. Sayer, C. Tyler-Smith, A. Cooper, R. Durbin, Iron Age and Anglo-Saxon genomes from East England reveal British migration history. *Nat. Commun.* **7**, 10408 (2016). doi:10.1038/ncomms10408
  37. A. A. Kovalev, D. Erdenebaatar, “Discovery of new cultures of the Bronze Age in Mongolia according to the data obtained by the International Central Asian Archaeological Expedition” in *Current Archaeological Research in Mongolia*, J. Bemmman, H. Parzinger, E. Pohl, D. Tseveendorzh, Eds. (Vor- und Frühgeschichtliche Archäologie Uni-Bonn, Bonn, 2009), pp. 149–170.
  38. G. Larson, E. K. Karlsson, A. Perri, M. T. Webster, S. Y. W. Ho, J. Peters, P. W. Stahl, P. J. Piper, F. Langaas, M. Fredholm, K. E. Comstock, J. F. Modiano, C. Schelling, A. I. Agoulnik, P. A. Leegwater, K. Dobney, J.-D. Vigne, C. Vilà, L. Andersson, K. Lindblad-Toh, Rethinking dog domestication by integrating genetics, archeology, and biogeography. *Proc. Natl. Acad. Sci. U.S.A.* **109**, 8878–8883 (2012). doi:10.1073/pnas.1203005109
  39. K. H. Røed, O. Flagstad, M. Nieminen, O. Holand, M. J. Dwyer, N. Røv, C. Vilà, Genetic analyses reveal independent domestication origins of Eurasian reindeer. *Proc. Biol. Sci.* **275**, 1849–1855 (2008). doi:10.1098/rspb.2008.0332

40. M. A. Zeder, Pathways to animal domestication. *Biodivers. Agric. Domest. Evol Sustain.* **2012**, 227–259 (2012).
41. R. Willerslev, P. Vitebsky, A. Alekseyev, Sacrifice as the ideal hunt: A cosmological explanation for the origin of reindeer domestication. *J. R. Anthropol. Inst.* **21**, 1–23 (2015). doi:10.1111/1467-9655.12142
42. I. Lazaridis, D. Nadel, G. Rollefson, D. C. Merrett, N. Rohland, S. Mallick, D. Fernandes, M. Novak, B. Gamarra, K. Sirak, S. Connell, K. Stewardson, E. Harney, Q. Fu, G. Gonzalez-Forbes, E. R. Jones, S. A. Roodenberg, G. Lengyel, F. Bocquentin, B. Gasparian, J. M. Monge, M. Gregg, V. Eshed, A.-S. Mizrahi, C. Meiklejohn, F. Gerritsen, L. Bejenaru, M. Blüher, A. Campbell, G. Cavalleri, D. Comas, P. Froguel, E. Gilbert, S. M. Kerr, P. Kovacs, J. Krause, D. McGettigan, M. Merrigan, D. A. Merriwether, S. O'Reilly, M. B. Richards, O. Semino, M. Shamoon-Pour, G. Stefanescu, M. Stumvoll, A. Tönjes, A. Torroni, J. F. Wilson, L. Yengo, N. A. Hovhannisyian, N. Patterson, R. Pinhasi, D. Reich, Genomic insights into the origin of farming in the ancient Near East. *Nature* **536**, 419–424 (2016). doi:10.1038/nature19310
43. A. Basu, N. Sarkar-Roy, P. P. Majumder, Genomic reconstruction of the history of extant populations of India reveals five distinct ancestral components and a complex structure. *Proc. Natl. Acad. Sci. U.S.A.* **113**, 1594–1599 (2016). doi:10.1073/pnas.1513197113
44. H.-P. Francfort, L'âge du bronze en Asie centrale: La civilisation de l'Oxus. *Anthropol. Middle East.* **4**, 91–111 (2009).
45. E. E. Kuz'mina, *The Origin of the Indo-Iranians* (Brill, Leiden, 2007).
46. A. Parpola, *The Roots of Hinduism: The Early Aryans and the Indus Civilization* (Oxford Univ. Press, USA, 2015).
47. I. Mathieson, I. Lazaridis, N. Rohland, S. Mallick, N. Patterson, S. A. Roodenberg, E. Harney, K. Stewardson, D. Fernandes, M. Novak, K. Sirak, C. Gamba, E. R. Jones, B. Llamas, S. Dryomov, J. Pickrell, J. L. Arsuaga, J. M. B. de Castro, E. Carbonell, F. Gerritsen, A. Khokhlov, P. Kuznetsov, M. Lozano, H. Meller, O. Mochalov, V. Moiseyev, M. A. R. Guerra, J. Roodenberg, J. M. Vergès, J. Krause, A. Cooper, K. W. Alt, D. Brown, D. Anthony, C. Lalueza-Fox, W. Haak, R. Pinhasi, D. Reich, Genome-wide patterns of selection in 230 ancient Eurasians. *Nature* **528**, 499–503 (2015). doi:10.1038/nature16152
48. K. Kristiansen, B. Hemphill, G. Barjamovic, S. Omura, S. Y. Senyurt, V. Moiseyev, A. Gromov, F. E. Yediay, H. Ahmad, A. Hameed, A. Samad, N. Gul, M. H. Khokhar, P. B. Damgaard, Archaeological supplement A to Damgaard et al. 2018: Archaeology of the Caucasus, Anatolia, Central and South Asia 4000-1500 BCE. [10.5281/zenodo.1240516](https://zenodo.org/record/1240516) (9 May 2018).
49. G. Kroonen, G. Barjamovic, M. Peyrot, Linguistic supplement to Damgaard et al. 2018: Early Indo-European Languages, Anatolian, Tocharian and Indo-Iranian. [10.5281/zenodo.1240524](https://zenodo.org/record/1240524) (9 May 2018).
50. K. Kristiansen, T. B. Larsson, *The Rise of Bronze Age Society: Travels, Transmissions and Transformations* (Cambridge Univ. Press, Cambridge, 2005).
51. M. Bonechi, Aleppo in età arcaica. A proposito di un'opera recente. *SEL* **7**, 15–37 (1990).

52. M. Mayrhofer, *Die Indo-Arier im Alten Vorderasien: Mit Einer Analytischen Bibliographie* (Harrassowitz, 1966).
53. H. C. Melchert, "The dialectal position of Anatolian within Indo-European" in *Annual Meeting of the Berkeley Linguistics Society* (1998), pp. 24–31.
54. J. Puhvel, "Whence the Hittite, whither the Jonesian vision?" in *Sprung from a common source*, S. M. Lamb, E. D. Mitchell, Eds. (Stanford Univ. Press, Stanford, Calif., 1991), pp. 51–66.
55. F. Kortlandt, C. C. Uhlenbeck on Indo-European, Uralic and Caucasian. *Hist. Sprachforsch* **122**, 39–47 (2009).
56. S. M. Winn, Burial evidence and the kurgan culture in Eastern Anatolia c. 3000 BC: An interpretation. *J. Indo-Eur. Stud.* **9**, 113–118 (1981).
57. I. Lazaridis, A. Mittnik, N. Patterson, S. Mallick, N. Rohland, S. Pfengle, A. Furtwängler, A. Peltzer, C. Posth, A. Vasilakis, P. J. P. McGeorge, E. Konsolaki-Yannopoulou, G. Korres, H. Martlew, M. Michalodimitrakis, M. Özsait, N. Özsait, A. Papathanasiou, M. Richards, S. A. Roodenberg, Y. Tzedakis, R. Arnott, D. M. Fernandes, J. R. Hughey, D. M. Lotakis, P. A. Navas, Y. Maniatis, J. A. Stamatoyannopoulos, K. Stewardson, P. Stockhammer, R. Pinhasi, D. Reich, J. Krause, G. Stamatoyannopoulos, Genetic origins of the Minoans and Mycenaeans. *Nature* **548**, 214–218 (2017).
58. B. Darden, "On the question of the Anatolian origin of Indo-Hittite" in *Greater Anatolia and the Indo-Hittite Language Family*, R. Drews, Ed. (Journal of Indo-European Studies, Washington, 2001), pp. 184–228.
59. A. T. Smith, *The Political Machine: Assembling Sovereignty in the Bronze Age Caucasus* (Princeton Univ. Press, 2015).
60. A. Sagona, *The Archaeology of the Caucasus: From Earliest Settlements to the Iron Age* (Cambridge Univ. Press, 2017).
61. C. Burney, D. M. Lang, *The Peoples of the Hills: Ancient Ararat and Caucasus* (Weidenfeld and Nicolson, London, 1971).
62. M. T. Larsen, *Ancient Kanesh: A Merchant Colony in Bronze Age Anatolia* (Cambridge Univ. Press, 2015).
63. M. Forlanini, "An attempt at reconstructing the branches of the Hittite royal family of the Early Kingdom period" in *Pax Hethitica: Studies on the Hittites and their neighbours in honour of Itamar Singer*, Y. Cohen, A. Gilan, J. L. Miller, Eds. (Harrassowitz, Wiesbaden, 2010), p. 115.
64. P. Skoglund, H. Malmström, A. Omrak, M. Raghavan, C. Valdiosera, T. Günther, P. Hall, K. Tambets, J. Parik, K.-G. Sjögren, J. Apel, E. Willerslev, J. Storå, A. Götherström, M. Jakobsson, Genomic diversity and admixture differs for Stone-Age Scandinavian foragers and farmers. *Science* **344**, 747–750 (2014). doi:10.1126/science.1253448
65. N. Lazaridis, A. Patterson, A. Mittnik, G. Renaud, S. Mallick, K. Kirsanow, P. H. Sudmant, J. G. Schraiber, S. Castellano, M. Lipson, B. Berger, C. Economou, R. Bollongino, Q. Fu, K. I. Bos, S. Nordenfelt, H. Li, C. de Filippo, K. Prüfer, S. Sawyer, C. Posth, W. Haak, F. Hallgren, E. Fornander, N. Rohland, D. Delsate, M. Francken, J.-M. Guinet, J. Wahl, G.

- Ayodo, H. A. Babiker, G. Bailliet, E. Balanovska, O. Balanovsky, R. Barrantes, G. Bedoya, H. Ben-Ami, J. Bene, F. Berrada, C. M. Bravi, F. Brisighelli, G. B. J. Busby, F. Cali, M. Churnosov, D. E. C. Cole, D. Corach, L. Damba, G. van Driem, S. Dryomov, J.-M. Dugoujon, S. A. Fedorova, I. Gallego Romero, M. Gubina, M. Hammer, B. M. Henn, T. Hervig, U. Hodoglugil, A. R. Jha, S. Karachanak-Yankova, R. Khusainova, E. Khusnutdinova, R. Kittles, T. Kivisild, W. Klitz, V. Kučinskas, A. Kushniarevich, L. Laredj, S. Litvinov, T. Loukidis, R. W. Mahley, B. Melegh, E. Metspalu, J. Molina, J. Mountain, K. Näkkäläjärvi, D. Nesheva, T. Nyambo, L. Osipova, J. Parik, F. Platonov, O. Posukh, V. Romano, F. Rothhammer, I. Rudan, R. Ruizbakiev, H. Sahakyan, A. Sajantila, A. Salas, E. B. Starikovskaya, A. Tarekegn, D. Toncheva, S. Turdikulova, I. Uktveryte, O. Utevska, R. Vasquez, M. Villena, M. Voevoda, C. A. Winkler, L. Yepiskoposyan, P. Zalloua, T. Zemunik, A. Cooper, C. Capelli, M. G. Thomas, A. Ruiz-Linares, S. A. Tishkoff, L. Singh, K. Thangaraj, R. Villems, D. Comas, R. Sukernik, M. Metspalu, M. Meyer, E. E. Eichler, J. Burger, M. Slatkin, S. Pääbo, J. Kelso, D. Reich, J. Krause, Ancient human genomes suggest three ancestral populations for present-day Europeans. *Nature* **513**, 409–413 (2014). [doi:10.1038/nature13673](https://doi.org/10.1038/nature13673)
66. L. Rahmstorf, “Indications of Aegean-Caucasian relations during the third millennium BC”, in *Von Maikop bis Trialeti. Gewinnung und Verbreitung von Metallen und Obsidian in Kaukasien im 4.-2. Jt. v. Chr.*, S. Hansen, A. Hauptmann, I. Motzenbäcker, E. Pernicka, Eds. (Verlag Rudolf Habelt, Bonn, 2010), pp. 263–295.
67. I. Mathieson, S. Alpaslan-Roodenberg, C. Posth, A. Szécsényi-Nagy, N. Rohland, S. Mallick, I. Olalde, N. Broomandkhoshbacht, F. Candilio, O. Cheronet, D. Fernandes, M. Ferry, B. Gamarra, G. G. Fortes, W. Haak, E. Harney, E. Jones, D. Keating, B. Krause-Kyora, I. Kucukkalipci, M. Michel, A. Mittnik, K. Nägele, M. Novak, J. Oppenheimer, N. Patterson, S. Pfrengle, K. Sirak, K. Stewardson, S. Vai, S. Alexandrov, K. W. Alt, R. Andreescu, D. Antonović, A. Ash, N. Atanassova, K. Bacvarov, M. B. Gusztáv, H. Bocherens, M. Bolus, A. Boroneanț, Y. Boyadzhiev, A. Budnik, J. Burmaz, S. Chohadzhiev, N. J. Conard, R. Cottiaux, M. Čuka, C. Cupillard, D. G. Drucker, N. Elenski, M. Francken, B. Galabova, G. Ganetsovski, B. Gély, T. Hajdu, V. Handzhyska, K. Harvati, T. Higham, S. Iliev, I. Janković, I. Karavanić, D. J. Kennett, D. Komšo, A. Kozak, D. Labuda, M. Lari, C. Lazar, M. Leppek, K. Leshtakov, D. L. Vetro, D. Los, I. Lozanov, M. Malina, F. Martini, K. McSweeney, H. Meller, M. Mendišić, P. Mirea, V. Moiseyev, V. Petrova, T. D. Price, A. Simalcik, L. Sineo, M. Šlaus, V. Slavchev, P. Stanev, A. Starović, T. Szeniczey, S. Talamo, M. Teschler-Nicola, C. Thevenet, I. Valchev, F. Valentin, S. Vasilyev, F. Veljanovska, S. Venelinova, E. Veselovskaya, B. Viola, C. Virag, J. Zaninović, S. Zäuner, P. W. Stockhammer, G. Catalano, R. Krauß, D. Caramelli, G. Zariņa, B. Gaydarska, M. Lillie, A. G. Nikitin, I. Potekhina, A. Papathanasiou, D. Borić, C. Bonsall, J. Krause, R. Pinhasi, D. Reich, The genomic history of southeastern Europe. *Nature* **555**, 197–203 (2018). [doi:10.1038/nature25778](https://doi.org/10.1038/nature25778)
68. S. Lumsden, “Material culture and the Middle Ground in the Old Assyrian Colony period” in *Old Assyrian studies in Memory of Paul Garelli* (Nederlands Instituut voor het Nabije Oosten, 2008), pp. 21–43.
69. M. T. Larsen, A. W. Lassen, “Cultural exchange at Kültepe” in *Extraction and Control: Studies In Honor of Matthew W Stolper* (Oriental Institute of the University of Chicago, 2014), pp. 171–188.

70. A. Lehrman, "Reconstructing Proto-Indo-Hittite" in *Greater Anatolia and the Indo-Hittite Language Family*, R. Drews, Ed. (Journal of Indo-European Studies monographs, 2001), vol. 38, pp. 106–130.
71. C. Watkins, "An Indo-European linguistic area and its characteristics: Anatolia" in *Areal Diffusion and Genetic Inheritance: Problems in Comparative Linguistics*, A.Y. Aikhenvald, R. M. W. Dixon, Eds. (Oxford Univ. Press, 2001), pp. 44–63.
72. N. Oettinger, "Indogermanische Sprachträger lebten schon im 3. Jahrtausend v. Chr. in Kleinasien" in *Die Hethiter und ihr Reich: Das Volk der 1000 Götter*, T. Özgüç, Ed. (Stuttgart, Theiss, 2002), pp. 50–55.
73. H. C. Melchert, Ed., *The Luwians* (Brill, 2003).
74. J. McKinley, "Compiling a skeletal inventory: disarticulated and co-mingled remains" in *Guidelines to the Standards for Recording Human Remains*, M. Brickley, J. McKinley, Eds. (BABAO and IFA, Reading, 2004) pp. 14–17.
75. J. H. Schwartz, *Skeleton Keys: An Introduction to Human Skeletal Morphology, Development and Analysis* (Oxford Univ. Press, Oxford, 2007).
76. T. W. Phenice, A newly developed visual method of sexing the os pubis. *Am. J. Phys. Anthropol.* **30**, 297–301 (1969). [doi:10.1002/ajpa.1330300214](https://doi.org/10.1002/ajpa.1330300214)
77. D. Ferembach, I. Schwindezy, M. Stoukal, Recommendations for age and sex diagnoses of skeletons. *J. Hum. Evol.* **9**, 517–549 (1980). [doi:10.1016/0047-2484\(80\)90061-5](https://doi.org/10.1016/0047-2484(80)90061-5)
78. S. R. Loth, M. Henneberg, Mandibular ramus flexure: A morphologic indicator of sexual dimorphism in the human skeleton. *Am. J. Phys. Anthropol.* **99**, 473–485 (1996). [doi:10.1002/\(SICI\)1096-8644\(199603\)99:3<473:AID-AJPA8>3.0.CO;2-X](https://doi.org/10.1002/(SICI)1096-8644(199603)99:3<473:AID-AJPA8>3.0.CO;2-X)
79. S. T. Brooks, J. M. Suchey, Skeletal age determination based on the os pubis: A comparison of the Acsádi-Nemeskéri and Suchey-Brooks methods. *Hum. Evol.* **5**, 227–238 (1990). [doi:10.1007/BF02437238](https://doi.org/10.1007/BF02437238)
80. C. O. Lovejoy, R. S. Meindl, T. R. Pryzbeck, R. P. Mensforth, Chronological metamorphosis of the auricular surface of the ilium: A new method for the determination of adult skeletal age at death. *Am. J. Phys. Anthropol.* **68**, 15–28 (1985). [doi:10.1002/ajpa.1330680103](https://doi.org/10.1002/ajpa.1330680103)
81. D. R. Brothwell, *Digging up Bones* (Oxford Univ. Press, Oxford, 1981).
82. M. Trotter, "Estimation of stature from intact long bones" in *Personal Identification in Mass Disasters*, T. D. Stewart, Ed. (Smithsonian Institution, Washington, 1970), pp. 71–83.
83. I. V. Mertz, V. K. Mertz, "Novye materialy rannego bronzovogo veka iz Zapadnoj chasti Kulundinskoj ravniny" in *Sokhranenie i izuchenie kul'turnogo nasledija Altajskogo kraja: Materialy XVIII XIX regional'nyh nauchno-prakticheskikh konferencij*, G. A. Kubareva, V. P. Semibratov, Eds. (Azbuka, Barnaul, 2013), pp. 207–215.
84. V. K. Merz, I. V. Merz Pogrebeniya, "'yamnogo' tipa Vostochnogo i Severo-Vostochnogo Kazakhstana (k postanovke problemy)" in *Afanasyevskiy Sbornik*, N. F. Stepanova, A. V. Polyakov, S. S. Tur, P. I. Shulga, Eds. (Azbuka, Barnaul, 2010), pp. 134–144.
85. G. A. Maksimenkov, "Okunevskaya Kultura," thesis abstract, Institute of History, Philology and Philosophy, Novosibirsk (1975).

86. I. P. Lazaretov, “K voprosu o yamno-katakombnykh svyazyah okunevskoy kul’tury” in *Problemy izucheniya okunevskoy kul’tury*, D. G. Savinov, Ed. (St. Petersburg State University, St. Petersburg, 1995) pp. 14–16.
87. M. N. Komarova, Burials of the Okunev Ulus. *Sovetskaya Archaeologia* **9**, 47–60 (1947).
88. A. W. Weber, R. J. Schulting, C. B. Ramsey, V. I. Bazaliiskii, O. I. Goriunova, E. B. Natal’ia, Chronology of middle Holocene hunter–gatherers in the Cis-Baikal region of Siberia: Corrections based on examination of the freshwater reservoir effect. *Quat. Int.* **419**, 74–98 (2016). doi:10.1016/j.quaint.2015.12.003
89. N. M. Moussa, V. I. Bazaliiskii, O. I. Goriunova, F. Bamforth, A. W. Weber, Y-chromosomal DNA analyzed for four prehistoric cemeteries from Cis-Baikal, Siberia. *J. Arch. Sci. Rep.* **17**, 932–942 (2018).
90. M. P. Ovchinnikov, *Materialy dlia izucheniia drevnostei v okrestnostiakh Irkutska. Izvestia VSORGO Vol XXXV* (Irkutskaia tipolitografiia, Irkutsk, 1904).
91. V. I. Bazaliiskii, N. A. Savelyev, The wolf of Baikal: The “Lokomotiv” early Neolithic cemetery in Siberia (Russia). *Antiquity* **77**, 20–30 (2003). doi:10.1017/S0003598X00061317
92. A. P. Okladnikov, A. K. Konopatskiy, Hunters for seal on the Baikal Lake in the Stone and Bronze Ages. *Folk Dan. Ethnogr. Tidsskr.* **16**, 299–308 (1974).
93. A. A. Tiutrin, V. I. Bazaliiskii, Mogil’nik v ust’e reki Idy v doline Angary. *Arkheologiiia Paleoekologiiia Ehnologiiia Sib Dalnego Vostoka* **1**, 85–90 (1996) [A cemetery at the mouth of the Ida River in the Angara River Valley].
94. A. W. Weber, H. G. McKenzie, A. R. Lieverse, O. I. Goriunova, Eds., *Kurma XI, a Middle Holocene hunter-gatherer cemetery on Lake Baikal, Siberia: Archaeological and Osteological Materials* (German Archaeological Institute, Berlin, 2012).
95. C. B. Ramsey, R. Schulting, O. I. Goriunova, V. I. Bazaliiskii, A. W. Weber, Analyzing radiocarbon reservoir offsets through stable nitrogen isotopes and Bayesian modeling: A case study using paired human and faunal remains from the Cis-Baikal region, Siberia. *Radiocarbon* **56**, 789–799 (2014). doi:10.2458/56.17160
96. T. Nomokonova, R. J. Losey, O. I. Goriunova, A. W. Weber, A freshwater old carbon offset in Lake Baikal, Siberia and problems with the radiocarbon dating of archaeological sediments: Evidence from the Sagan-Zaba II site. *Quat. Int.* **290**, 110–125 (2013). doi:10.1016/j.quaint.2012.06.007
97. R. J. Schulting, C. B. Ramsey, V. I. Bazaliiskii, O. I. Goriunova, A. W. Weber, Freshwater reservoir offsets investigated through paired human-faunal 14 C dating and stable carbon and nitrogen isotope analysis at Lake Baikal, Siberia. *Radiocarbon* **56**, 991–1008 (2014). doi:10.2458/56.17963
98. S. Omura, “Preliminary report on the ninth excavation at Kaman-Kalehöyük (1994)” in *Essays on Ancient Anatolia and Syria in the second and third millennium B.C.*, T. Mikasa, Ed. (Harrassowitz, Wiesbaden, 1996), pp. 87–163.
99. H. Hongo, “Continuity or changes: faunal remains from stratum IId at Kaman-Kalehöyük” in *Identifying Changes: The Transition from Bronze to Iron Ages in Anatolia and its*

- Neighbouring Regions*, B. Fischer, H. Genz, É. Jean, K. Köroğlu, Eds. (Türk Eskiçağ Bilimleri Enstitüsü, Istanbul, 2003), pp. 257–269.
100. S. Omura, “Kaman-Kalehöyük excavations in central Anatolia” in *The Oxford Handbook of Ancient Anatolia*, G. McMahon, S. Steadman, Eds. (Oxford Univ. Press, Oxford, 2011), pp. 1095–1111.
  101. S. Y. Şenyurt, A. Akçay, Y. Kemiş, “Ovaören 2013 Yılı Kazıları” in *36. Kazı Sonuçları Toplantısı*, H. Dönmez, Ed. (T. C. Kültür ve turizm bakanlığı, Ankara, 2014), vol. II, pp. 101–120.
  102. S. Y. Şenyurt, A. Akçay, Y. Kemiş, Nevşehir-Ovaören Kazısı 2012. *TEBE-Haberler* **36**, 24–26 (2013).
  103. T. Şener, “Ovaören/Topakhöyük ve Teras Yerleşimi Erken Tunç Çağı Mezarlarının Arkeolojik ve Antropolojik Açından Değerlendirilmesi” thesis, Gazi University (2014).
  104. V. M. Masson, G. A. Pugachenkova, *Jeitun settlement (problems of the origin of the producing economy)* (Nauka, Moscow, 1971).
  105. B. A. Kuftin, Studies of the Southern Turkmenistan Archeological Complex Expedition on studies of the Anau culture in 1952. *Izvestiya Akademii Nauk Turkmenskoy SSR. Seriya Oschestvennye Nauki* **1**, 22–29 (1954).
  106. B. A. Kuftin, Report on excavations of the XIV excavation team of the Southern Turkmenistan Archeological Complex Expedition of agricultural settlements of the Eneolithic and Bronze Age in 1952. *Trudy Uzhno-Turkmenistanskoy arkheologicheskoy kompleksnoy ekspeditsii*. **7**, 260–290 (1956).
  107. N. Y. Merpert, “The Eneolithic of the Southern part of the USSR and Eurasian steppes” in *Eneolithic of the USSR*, V. M. Masson, N. Y. Merpert, Eds. (Nauka, Moscow, 1982), pp. 322–331.
  108. V. M. Masson, *Srednyaya Aziya i Drevniy Vostok* (Nauka, Moscow-Leningrad, 1964).
  109. N. A. Avanesova, D. M. Jurakulova, “The ancient nomads of Zarafshan” in *Culture of nomadic peoples of Central Asia* (Proceedings of the International Conference, Samarkand, MICAI, 2008), pp. 13–33.
  110. P. B. Damgaard, A. Margaryan, H. Schroeder, L. Orlando, E. Willerslev, M. E. Allentoft, Improving access to endogenous DNA in ancient bones and teeth. *Sci. Rep.* **5**, 11184 (2015). doi:10.1038/srep11184
  111. E. Willerslev, A. Cooper, Review Paper. Ancient DNA. *Proc. R. Soc. London Ser. B* **272**, 3–16 (2005). doi:10.1098/rspb.2004.2813
  112. L. Orlando, A. Ginolhac, G. Zhang, D. Froese, A. Albrechtsen, M. Stiller, M. Schubert, E. Cappellini, B. Petersen, I. Moltke, P. L. F. Johnson, M. Fumagalli, J. T. Vilstrup, M. Raghavan, T. Korneliussen, A.-S. Malaspinas, J. Vogt, D. Szklarczyk, C. D. Kelstrup, J. Vinther, A. Dolocan, J. Stenderup, A. M. V. Velazquez, J. Cahill, M. Rasmussen, X. Wang, J. Min, G. D. Zazula, A. Seguin-Orlando, C. Mortensen, K. Magnussen, J. F. Thompson, J. Weinstock, K. Gregersen, K. H. Røed, V. Eisenmann, C. J. Rubin, D. C. Miller, D. F. Antczak, M. F. Bertelsen, S. Brunak, K. A. S. Al-Rasheid, O. Ryder, L. Andersson, J. Mundy, A. Krogh, M. T. P. Gilbert, K. Kjær, T. Sicheritz-Ponten, L. J.



- Jensen, J. V. Olsen, M. Hofreiter, R. Nielsen, B. Shapiro, J. Wang, E. Willerslev, Recalibrating Equus evolution using the genome sequence of an early Middle Pleistocene horse. *Nature* **499**, 74–78 (2013). [doi:10.1038/nature12323](https://doi.org/10.1038/nature12323)
113. R. Sinha, G. Stanley, G. S. Gulati, C. Ezran, K. J. Travaglini, Index switching causes “spreading-of-signal” among multiplexed samples in Illumina HiSeq 4000 DNA sequencing. *bioRxiv*, 125724 [Preprint] (9 April 2017). <https://doi.org/10.1101/125724>
  114. J. Dabney, M. Meyer, Length and GC-biases during sequencing library amplification: A comparison of various polymerase-buffer systems with ancient and modern DNA sequencing libraries. *Biotechniques* **52**, 87–94 (2012). [doi:10.2144/000113809](https://doi.org/10.2144/000113809)
  115. E. H. M. Wong, A. Khrunin, L. Nichols, D. Pushkarev, D. Khokhrin, D. Verbenko, O. Evgrafov, J. Knowles, J. Novembre, S. Limborska, A. Valouev, Reconstructing genetic history of Siberian and Northeastern European populations. *Genome Res.* **27**, 1–14 (2017). [doi:10.1101/gr.202945.115](https://doi.org/10.1101/gr.202945.115)
  116. H. Li, B. Handsaker, A. Wysoker, T. Fennell, J. Ruan, N. Homer, G. Marth, G. Abecasis, R. Durbin, 1000 Genome Project Data Processing Subgroup, The Sequence Alignment/Map format and SAMtools. *Bioinformatics* **25**, 2078–2079 (2009). [doi:10.1093/bioinformatics/btp352](https://doi.org/10.1093/bioinformatics/btp352)
  117. M. Schubert, S. Lindgreen, L. Orlando, AdapterRemoval v2: Rapid adapter trimming, identification, and read merging. *BMC Res. Notes* **9**, 88 (2016). [doi:10.1186/s13104-016-1900-2](https://doi.org/10.1186/s13104-016-1900-2)
  118. H. Li, Aligning sequence reads, clone sequences and assembly contigs with BWA-MEM. [arXiv:1303.3997](https://arxiv.org/abs/1303.3997) [q-bio.GN] (16 March 2013).
  119. M. A. DePristo, E. Banks, R. Poplin, K. V. Garimella, J. R. Maguire, C. Hartl, A. A. Philippakis, G. del Angel, M. A. Rivas, M. Hanna, A. McKenna, T. J. Fennell, A. M. Kernysky, A. Y. Sivachenko, K. Cibulskis, S. B. Gabriel, D. Altshuler, M. J. Daly, A framework for variation discovery and genotyping using next-generation DNA sequencing data. *Nat. Genet.* **43**, 491–498 (2011). [doi:10.1038/ng.806](https://doi.org/10.1038/ng.806)
  120. F. García-Alcalde, K. Okonechnikov, J. Carbonell, L. M. Cruz, S. Götz, S. Tarazona, J. Dopazo, T. F. Meyer, A. Conesa, Qualimap: Evaluating next-generation sequencing alignment data. *Bioinformatics* **28**, 2678–2679 (2012). [doi:10.1093/bioinformatics/bts503](https://doi.org/10.1093/bioinformatics/bts503)
  121. Q. Fu, A. Mittnik, P. L. F. Johnson, K. Bos, M. Lari, R. Bollongino, C. Sun, L. Giemsch, R. Schmitz, J. Burger, A. M. Ronchitelli, F. Martini, R. G. Cremonesi, J. Svoboda, P. Bauer, D. Caramelli, S. Castellano, D. Reich, S. Pääbo, J. Krause, A revised timescale for human evolution based on ancient mitochondrial genomes. *Curr. Biol.* **23**, 553–559 (2013). [doi:10.1016/j.cub.2013.02.044](https://doi.org/10.1016/j.cub.2013.02.044)
  122. R. E. Green, J. Krause, A. W. Briggs, T. Maricic, U. Stenzel, M. Kircher, N. Patterson, H. Li, W. Zhai, M. H.-Y. Fritz, N. F. Hansen, E. Y. Durand, A.-S. Malaspinas, J. D. Jensen, T. Marques-Bonet, C. Alkan, K. Prüfer, M. Meyer, H. A. Burbano, J. M. Good, R. Schultz, A. Aximu-Petri, A. Butthof, B. Höber, B. Höffner, M. Siegemund, A. Weihmann, C. Nusbaum, E. S. Lander, C. Russ, N. Novod, J. Affourtit, M. Egholm, C. Verna, P. Rudan, D. Brajkovic, Z. Kucan, I. Gusic, V. B. Doronichev, L. V. Golovanova, C. Lalueza-Fox, M. de la Rasilla, J. Fortea, A. Rosas, R. W. Schmitz, P. L. F. Johnson, E.

- E. Eichler, D. Falush, E. Birney, J. C. Mullikin, M. Slatkin, R. Nielsen, J. Kelso, M. Lachmann, D. Reich, S. Pääbo, A draft sequence of the Neandertal genome. *Science* **328**, 710–722 (2010). [doi:10.1126/science.1188021](https://doi.org/10.1126/science.1188021)
123. M. Rasmussen, X. Guo, Y. Wang, K. E. Lohmueller, S. Rasmussen, A. Albrechtsen, L. Skotte, S. Lindgreen, M. Metspalu, T. Jombart, T. Kivisild, W. Zhai, A. Eriksson, A. Manica, L. Orlando, F. M. De La Vega, S. Tridico, E. Metspalu, K. Nielsen, M. C. Ávila-Arcos, J. V. Moreno-Mayar, C. Muller, J. Dortch, M. T. P. Gilbert, O. Lund, A. Wesolowska, M. Karmin, L. A. Weinert, B. Wang, J. Li, S. Tai, F. Xiao, T. Hanihara, G. van Driem, A. R. Jha, F.-X. Ricaut, P. de Knijff, A. B. Migliano, I. Gallego Romero, K. Kristiansen, D. M. Lambert, S. Brunak, P. Forster, B. Brinkmann, O. Nehlich, M. Bunce, M. Richards, R. Gupta, C. D. Bustamante, A. Krogh, R. A. Foley, M. M. Lahr, F. Balloux, T. Sicheritz-Pontén, R. Villems, R. Nielsen, J. Wang, E. Willerslev, An Aboriginal Australian genome reveals separate human dispersals into Asia. *Science* **334**, 94–98 (2011). [doi:10.1126/science.1211177](https://doi.org/10.1126/science.1211177)
  124. P. Skoglund, J. Storå, A. Götherström, M. Jakobsson, Accurate sex identification of ancient human remains using DNA shotgun sequencing. *J. Archaeol. Sci.* **40**, 4477–4482 (2013). [doi:10.1016/j.jas.2013.07.004](https://doi.org/10.1016/j.jas.2013.07.004)
  125. M. Lipatov, K. Sanjeev, R. Patro, K. Veeramah, Maximum likelihood estimation of biological relatedness from low coverage sequencing data. bioRxiv, 023374 [Preprint] (29 July 2015). <https://doi.org/10.1101/023374>
  126. J. E. Wigginton, D. J. Cutler, G. R. Abecasis, A note on exact tests of Hardy-Weinberg equilibrium. *Am. J. Hum. Genet.* **76**, 887–893 (2005). [doi:10.1086/429864](https://doi.org/10.1086/429864)
  127. S. Purcell, B. Neale, K. Todd-Brown, L. Thomas, M. A. R. Ferreira, D. Bender, J. Maller, P. Sklar, P. I. W. de Bakker, M. J. Daly, P. C. Sham, PLINK: A tool set for whole-genome association and population-based linkage analyses. *Am. J. Hum. Genet.* **81**, 559–575 (2007). [doi:10.1086/519795](https://doi.org/10.1086/519795)
  128. Q. Fu, H. Li, P. Moorjani, F. Jay, S. M. Slepchenko, A. A. Bondarev, P. L. F. Johnson, A. Aximu-Petri, K. Prüfer, C. de Filippo, M. Meyer, N. Zwyns, D. C. Salazar-García, Y. V. Kuzmin, S. G. Keates, P. A. Kosintsev, D. I. Razhev, M. P. Richards, N. V. Peristov, M. Lachmann, K. Douka, T. F. G. Higham, M. Slatkin, J.-J. Hublin, D. Reich, J. Kelso, T. B. Viola, S. Pääbo, Genome sequence of a 45,000-year-old modern human from western Siberia. *Nature* **514**, 445–449 (2014). [doi:10.1038/nature13810](https://doi.org/10.1038/nature13810)
  129. O. Delaneau, J. Marchini, J.-F. Zagury, A linear complexity phasing method for thousands of genomes. *Nat. Methods* **9**, 179–181 (2011). [doi:10.1038/nmeth.1785](https://doi.org/10.1038/nmeth.1785)
  130. S. Leslie, B. Winney, G. Hellenthal, D. Davison, A. Boumertit, T. Day, K. Hutnik, E. C. Royrvik, B. Cunliffe, D. J. Lawson, D. Falush, C. Freeman, M. Pirinen, S. Myers, M. Robinson, P. Donnelly, W. Bodmer, Wellcome Trust Case Control Consortium 2, International Multiple Sclerosis Genetics Consortium, The fine-scale genetic structure of the British population. *Nature* **519**, 309–314 (2015). [doi:10.1038/nature14230](https://doi.org/10.1038/nature14230)
  131. P. F. Palamara, L. C. Francioli, P. R. Wilton, G. Genovese, A. Gusev, H. K. Finucane, S. Sankararaman, S. R. Sunyaev, P. I. W. de Bakker, J. Wakeley, I. Pe'er, A. L. Price, Genome of the Netherlands Consortium, Leveraging Distant Relatedness to Quantify

- Human Mutation and Gene-Conversion Rates. *Am. J. Hum. Genet.* **97**, 775–789 (2015). doi:10.1016/j.ajhg.2015.10.006
132. M. Lipson, P.-R. Loh, S. Sankararaman, N. Patterson, B. Berger, D. Reich, Calibrating the Human Mutation Rate via Ancestral Recombination Density in Diploid Genomes. *PLOS Genet.* **11**, e1005550 (2015). doi:10.1371/journal.pgen.1005550
  133. N. Patterson, P. Moorjani, Y. Luo, S. Mallick, N. Rohland, Y. Zhan, T. Genschoreck, T. Webster, D. Reich, Ancient admixture in human history. *Genetics* **192**, 1065–1093 (2012). doi:10.1534/genetics.112.145037
  134. H. Li, A statistical framework for SNP calling, mutation discovery, association mapping and population genetical parameter estimation from sequencing data. *Bioinformatics* **27**, 2987–2993 (2011). doi:10.1093/bioinformatics/btr509
  135. G. D. Poznik, B. M. Henn, M.-C. Yee, E. Sliwerska, G. M. Euskirchen, A. A. Lin, M. Snyder, L. Quintana-Murci, J. M. Kidd, P. A. Underhill, C. D. Bustamante, Sequencing Y chromosomes resolves discrepancy in time to common ancestor of males versus females. *Science* **341**, 562–565 (2013). doi:10.1126/science.1237619
  136. G. D. Poznik, Identifying Y-chromosome haplogroups in arbitrarily large samples of sequenced or genotyped men. bioRxiv, 088716 [Preprint]. (19 November 2016). <https://doi.org/10.1101/088716>
  137. M. Rasmussen, S. L. Anzick, M. R. Waters, P. Skoglund, M. DeGiorgio, T. W. Stafford Jr., S. Rasmussen, I. Moltke, A. Albrechtsen, S. M. Doyle, G. D. Poznik, V. Gudmundsdottir, R. Yadav, A.-S. Malaspina, S. S. White 5th, M. E. Allentoft, O. E. Cornejo, K. Tambets, A. Eriksson, P. D. Heintzman, M. Karmin, T. S. Korneliussen, D. J. Meltzer, T. L. Pierre, J. Stenderup, L. Saag, V. M. Warmuth, M. C. Lopes, R. S. Malhi, S. Brunak, T. Sicheritz-Ponten, I. Barnes, M. Collins, L. Orlando, F. Balloux, A. Manica, R. Gupta, M. Metspalu, C. D. Bustamante, M. Jakobsson, R. Nielsen, E. Willerslev, The genome of a Late Pleistocene human from a Clovis burial site in western Montana. *Nature* **506**, 225–229 (2014). doi:10.1038/nature13025
  138. M. Rasmussen, Y. Li, S. Lindgreen, J. S. Pedersen, A. Albrechtsen, I. Moltke, M. Metspalu, E. Metspalu, T. Kivisild, R. Gupta, M. Bertalan, K. Nielsen, M. T. P. Gilbert, Y. Wang, M. Raghavan, P. F. Campos, H. M. Kamp, A. S. Wilson, A. Gledhill, S. Tridico, M. Bunce, E. D. Lorenzen, J. Binladen, X. Guo, J. Zhao, X. Zhang, H. Zhang, Z. Li, M. Chen, L. Orlando, K. Kristiansen, M. Bak, N. Tommerup, C. Bendixen, T. L. Pierre, B. Grønnow, M. Meldgaard, C. Andreasen, S. A. Fedorova, L. P. Osipova, T. F. G. Higham, C. B. Ramsey, T. V. O. Hansen, F. C. Nielsen, M. H. Crawford, S. Brunak, T. Sicheritz-Pontén, R. Villems, R. Nielsen, A. Krogh, J. Wang, E. Willerslev, Ancient human genome sequence of an extinct Palaeo-Eskimo. *Nature* **463**, 757–762 (2010). doi:10.1038/nature08835
  139. C. Gamba, E. R. Jones, M. D. Teasdale, R. L. McLaughlin, G. Gonzalez-Fortes, V. Mattiangeli, L. Domboróczki, I. Kővári, I. Pap, A. Anders, A. Whittle, J. Dani, P. Raczky, T. F. G. Higham, M. Hofreiter, D. G. Bradley, R. Pinhasi, Genome flux and stasis in a five millennium transect of European prehistory. *Nat. Commun.* **5**, 5257 (2014). doi:10.1038/ncomms6257

140. R. C. Edgar, MUSCLE: Multiple sequence alignment with high accuracy and high throughput. *Nucleic Acids Res.* **32**, 1792–1797 (2004). doi:10.1093/nar/gkh340
141. S. Kumar, G. Stecher, K. Tamura, MEGA7: Molecular evolutionary genetics analysis version 7.0 for bigger datasets. *Mol. Biol. Evol.* **33**, 1870–1874 (2016). doi:10.1093/molbev/msw054
142. M. Rasmussen, M. Sikora, A. Albrechtsen, T. S. Korneliussen, J. V. Moreno-Mayar, G. D. Poznik, C. P. E. Zollikofer, M. P. de León, M. E. Allentoft, I. Moltke, H. Jónsson, C. Valdiosera, R. S. Malhi, L. Orlando, C. D. Bustamante, T. W. Stafford Jr., D. J. Meltzer, R. Nielsen, E. Willerslev, The ancestry and affiliations of Kennewick Man. *Nature* **523**, 455–458 (2015).
143. M. C. Dulik, S. I. Zhadanov, L. P. Osipova, A. Askapuli, L. Gau, O. Gokcumen, S. Rubinstein, T. G. Schurr, Mitochondrial DNA and Y chromosome variation provides evidence for a recent common ancestry between Native Americans and Indigenous Altaians. *Am. J. Hum. Genet.* **90**, 229–246 (2012). doi:10.1016/j.ajhg.2011.12.014
144. T. Kivisild, The study of human Y chromosome variation through ancient DNA. *Hum. Genet.* **136**, 529–546 (2017). doi:10.1007/s00439-017-1773-z
145. Q. Fu, M. Hajdinjak, O. T. Moldovan, S. Constantin, S. Mallick, P. Skoglund, N. Patterson, N. Rohland, I. Lazaridis, B. Nickel, B. Viola, K. Prüfer, M. Meyer, J. Kelso, D. Reich, S. Pääbo, An early modern human from Romania with a recent Neanderthal ancestor. *Nature* **524**, 216–219 (2015). doi:10.1038/nature14558
146. C. Keyser, C. Hollard, A. Gonzalez, J.-L. Fausser, E. Rivals, A. N. Alexeev, A. Riberon, E. Crubézy, B. Ludes, The ancient Yakuts: A population genetic enigma. *Philos. Trans. R. Soc. Lond. B Biol. Sci.* **370**, 20130385 (2015). doi:10.1098/rstb.2013.0385
147. M. Karmin, L. Saag, M. Vicente, M. A. Wilson Sayres, M. Järve, U. G. Talas, S. Rootsi, A.-M. Ilumäe, R. Mägi, M. Mitt, L. Pagani, T. Puurand, Z. Faltyskova, F. Clemente, A. Cardona, E. Metspalu, H. Sahakyan, B. Yunusbayev, G. Hudjashov, M. DeGiorgio, E.-L. Loogväli, C. Eichstaedt, M. Eelmets, G. Chaubey, K. Tambets, S. Litvinov, M. Mormina, Y. Xue, Q. Ayub, G. Zoraqi, T. S. Korneliussen, F. Akhatova, J. Lachance, S. Tishkoff, K. Momynaliev, F.-X. Ricaut, P. Kusuma, H. Razafindrazaka, D. Pierron, M. P. Cox, G. N. N. Sultana, R. Willerslev, C. Muller, M. Westaway, D. Lambert, V. Skaro, L. Kovačević, S. Turdikulova, D. Dalimova, R. Khusainova, N. Trofimova, V. Akhmetova, I. Khidiyatova, D. V. Lichman, J. Isakova, E. Pocheshkhova, Z. Sabitov, N. A. Barashkov, P. Nymadawa, E. Mihailov, J. W. T. Seng, I. Evseeva, A. B. Migliano, S. Abdullah, G. Andriadze, D. Primorac, L. Atramentova, O. Utevska, L. Yepiskoposyan, D. Marjanovic, A. Kushniarevich, D. M. Behar, C. Gilissen, L. Vissers, J. A. Veltman, E. Balanovska, M. Derenko, B. Malyarchuk, A. Metspalu, S. Fedorova, A. Eriksson, A. Manica, F. L. Mendez, T. M. Karafet, K. R. Veeramah, N. Bradman, M. F. Hammer, L. P. Osipova, O. Balanovsky, E. K. Khusnutdinova, K. Johnsen, M. Remm, M. G. Thomas, C. Tyler-Smith, P. A. Underhill, E. Willerslev, R. Nielsen, M. Metspalu, R. Villems, T. Kivisild, A recent bottleneck of Y chromosome diversity coincides with a global change in culture. *Genome Res.* **25**, 459–466 (2015). doi:10.1101/gr.186684.114
148. P. A. Underhill, G. D. Poznik, S. Rootsi, M. Järve, A. A. Lin, J. Wang, B. Passarelli, J. Kanbar, N. M. Myres, R. J. King, J. Di Cristofaro, H. Sahakyan, D. M. Behar, A.

- Kushniarevich, J. Šarac, T. Šaric, P. Rudan, A. K. Pathak, G. Chaubey, V. Grugni, O. Semino, L. Yepiskoposyan, A. Bahmanimehr, S. Farjadian, O. Balanovsky, E. K. Khusnutdinova, R. J. Herrera, J. Chiaroni, C. D. Bustamante, S. R. Quake, T. Kivisild, R. Villems, The phylogenetic and geographic structure of Y-chromosome haplogroup R1a. *Eur. J. Hum. Genet.* **23**, 1–8 (2014).
149. Z. Hofmanová, S. Kreutzer, G. Hellenthal, C. Sell, Y. Diekmann, D. Díez-Del-Molino, L. van Dorp, S. López, A. Kousathanas, V. Link, K. Kirsanow, L. M. Cassidy, R. Martiniano, M. Strobel, A. Scheu, K. Kotsakis, P. Halstead, S. Triantaphyllou, N. Kyparissi-Apostolika, D. Urem-Kotsou, C. Ziota, F. Adaktylou, S. Gopalan, D. M. Bobo, L. Winkelbach, J. Blöcher, M. Unterländer, C. Leuenberger, Ç. Çilingiroğlu, B. Horejs, F. Gerritsen, S. J. Shennan, D. G. Bradley, M. Currat, K. R. Veeramah, D. Wegmann, M. G. Thomas, C. Papageorgopoulou, J. Burger, Early farmers from across Europe directly descended from Neolithic Aegeans. *Proc. Natl. Acad. Sci. U.S.A.* **113**, 6886–6891 (2016). doi:10.1073/pnas.1523951113
  150. V. Battaglia, V. Grugni, U. A. Perego, N. Angerhofer, J. E. Gomez-Palmieri, S. R. Woodward, A. Achilli, N. Myres, A. Torroni, O. Semino, The first peopling of South America: New evidence from Y-chromosome haplogroup Q. *PLOS ONE* **8**, e71390 (2013). doi:10.1371/journal.pone.0071390
  151. H. Weissensteiner, D. Pacher, A. Kloss-Brandstätter, L. Forer, G. Specht, H.-J. Bandelt, F. Kronenberg, A. Salas, S. Schönherr, HaploGrep 2: Mitochondrial haplogroup classification in the era of high-throughput sequencing. *Nucleic Acids Res.* **44** (W1), W58–W63 (2016). doi:10.1093/nar/gkw233
  152. A. Stamatakis, RAxML version 8: A tool for phylogenetic analysis and post-analysis of large phylogenies. *Bioinformatics* **30**, 1312–1313 (2014). doi:10.1093/bioinformatics/btu033
  153. S. A. Fedorova, M. Reidla, E. Metspalu, M. Metspalu, S. Rootsi, K. Tambets, N. Trofimova, S. I. Zhadanov, B. Hooshiar Kashani, A. Olivieri, M. I. Voevoda, L. P. Osipova, F. A. Platonov, M. I. Tomskey, E. K. Khusnutdinova, A. Torroni, R. Villems, Autosomal and uniparental portraits of the native populations of Sakha (Yakutia): Implications for the peopling of Northeast Eurasia. *BMC Evol. Biol.* **13**, 127 (2013). doi:10.1186/1471-2148-13-127
  154. P. Flegontov, N. E. Altinisik, P. Changmai, N. Rohland, Paleo-Eskimo genetic legacy across North America. bioRxiv, 203018 [Preprint]. (13 October 2017). <https://doi.org/10.1101/203018>
  155. A. T. Duggan, M. Whitten, V. Wiebe, M. Crawford, A. Butthof, V. Spitsyn, S. Makarov, I. Novgorodov, V. Osakovsky, B. Pakendorf, Investigating the prehistory of Tungusic peoples of Siberia and the Amur-Ussuri region with complete mtDNA genome sequences and Y-chromosomal. *PLOS ONE* **8**, e83570 (2013). doi:10.1371/journal.pone.0083570
  156. C. Der Sarkissian, O. Balanovsky, G. Brandt, V. Khartanovich, A. Buzhilova, S. Koshel, V. Zaporozhchenko, D. Gronenborn, V. Moiseyev, E. Kolpakov, V. Shumkin, K. W. Alt, E. Balanovska, A. Cooper, W. Haak, Genographic Consortium, Ancient DNA reveals prehistoric gene-flow from siberia in the complex human population history of North East Europe. *PLOS Genet.* **9**, e1003296 (2013). doi:10.1371/journal.pgen.1003296

157. M. Ingman, U. Gyllensten, A recent genetic link between Sami and the Volga-Ural region of Russia. *Eur. J. Hum. Genet.* **15**, 115–120 (2007). doi:10.1038/sj.ejhg.5201712
158. M. Derenko, B. Malyarchuk, T. Grzybowski, G. Denisova, U. Rogalla, M. Perkova, I. Dambueva, I. Zakharov, Origin and post-glacial dispersal of mitochondrial DNA haplogroups C and D in northern Asia. *PLOS ONE* **5**, e15214 (2010). doi:10.1371/journal.pone.0015214
159. D. Comas, S. Plaza, R. S. Wells, N. Yuldaseva, O. Lao, F. Calafell, J. Bertranpetit, Admixture, migrations, and dispersals in Central Asia: Evidence from maternal DNA lineages. *Eur. J. Hum. Genet.* **12**, 495–504 (2004). doi:10.1038/sj.ejhg.5201160
160. E. Crubézy, S. Amory, C. Keyser, C. Bouakaze, M. Bodner, M. Gibert, A. Röck, W. Parson, A. Alexeev, B. Ludes, Human evolution in Siberia: From frozen bodies to ancient DNA. *BMC Evol. Biol.* **10**, 25 (2010). doi:10.1186/1471-2148-10-25
161. M. Pala, A. Olivieri, A. Achilli, M. Accetturo, E. Metspalu, M. Reidla, E. Tamm, M. Karmin, T. Reisberg, B. Hooshiar Kashani, U. A. Perego, V. Carossa, F. Gandini, J. B. Pereira, P. Soares, N. Angerhofer, S. Rychkov, N. Al-Zahery, V. Carelli, M. H. Sanati, M. Houshmand, J. Hatina, V. Macaulay, L. Pereira, S. R. Woodward, W. Davies, C. Gamble, D. Baird, O. Semino, R. Villems, A. Torroni, M. B. Richards, Mitochondrial DNA signals of late glacial recolonization of Europe from near eastern refugia. *Am. J. Hum. Genet.* **90**, 915–924 (2012). doi:10.1016/j.ajhg.2012.04.003
162. S. Mallick, H. Li, M. Lipson, I. Mathieson, M. Gymrek, F. Racimo, M. Zhao, N. Chennagiri, S. Nordenfelt, A. Tandon, P. Skoglund, I. Lazaridis, S. Sankararaman, Q. Fu, N. Rohland, G. Renaud, Y. Erlich, T. Willems, C. Gallo, J. P. Spence, Y. S. Song, G. Poletti, F. Balloux, G. van Driem, P. de Knijff, I. G. Romero, A. R. Jha, D. M. Behar, C. M. Bravi, C. Capelli, T. Hervig, A. Moreno-Estrada, O. L. Posukh, E. Balanovska, O. Balanovsky, S. Karachanak-Yankova, H. Sahakyan, D. Toncheva, L. Yepiskoposyan, C. Tyler-Smith, Y. Xue, M. S. Abdullah, A. Ruiz-Linares, C. M. Beall, A. Di Rienzo, C. Jeong, E. B. Starikovskaya, E. Metspalu, J. Parik, R. Villems, B. M. Henn, U. Hodoglugil, R. Mahley, A. Sajantila, G. Stamatoyannopoulos, J. T. S. Wee, R. Khusainova, E. Khusnutdinova, S. Litvinov, G. Ayodo, D. Comas, M. F. Hammer, T. Kivisild, W. Klitz, C. A. Winkler, D. Labuda, M. Bamshad, L. B. Jorde, S. A. Tishkoff, W. S. Watkins, M. Metspalu, S. Dryomov, R. Sukernik, L. Singh, K. Thangaraj, S. Pääbo, J. Kelso, N. Patterson, D. Reich, The Simons Genome Diversity Project: 300 genomes from 142 diverse populations. *Nature* **538**, 201–206 (2016). doi:10.1038/nature18964
163. I. Mathieson, G. McVean, Demography and the age of rare variants. *PLOS Genet.* **10**, e1004528 (2014). doi:10.1371/journal.pgen.1004528
164. T. D. O'Connor, W. Fu, NHLBI GO Exome Sequencing Project, ESP Population Genetics and Statistical Analysis Working Group, Emily Turner, J. C. Mychaleckyj, B. Logsdon, P. Auer, C. S. Carlson, S. M. Leal, J. D. Smith, M. J. Rieder, M. J. Bamshad, D. A. Nickerson, J. M. Akey, Rare variation facilitates inferences of fine-scale population structure in humans. *Mol. Biol. Evol.* **32**, 653–660 (2015).

165. S. Sawyer, J. Krause, K. Guschanski, V. Savolainen, S. Pääbo, Temporal patterns of nucleotide misincorporations and DNA fragmentation in ancient DNA. *PLOS ONE* **7**, e34131 (2012). [doi:10.1371/journal.pone.0034131](https://doi.org/10.1371/journal.pone.0034131)
166. G. N. Lance, W. T. Williams, Computer programs for hierarchical polythetic classification (“Similarity analyses”). *Comput. J.* **9**, 60–64 (1966). [doi:10.1093/comjnl/9.1.60](https://doi.org/10.1093/comjnl/9.1.60)
167. M. Maechler, P. Rousseeuw, A. Struyf, M. Hubert, K. Hornik, Cluster: luster analysis basics and extensions, R Package (2012).
168. P. Reimer, S. Hoper, J. MacDonald, R. Reimer, S. Svyatko, M. Thompson, “The Queen’s University, Belfast: Laboratory Protocols Used for AMS Radiocarbon Dating at the 14CHRONO Centre”, (Rep. 5/2015, Historic England, 2015).
